# Supplementary material for: Modulation of fracture healing by the transient accumulation of senescent cells
Source: eLife. 2021 Oct 7;10:e69958. doi: 10.7554/eLife.69958 (PMC8526061; doi:10.7554/eLife.69958)
Supplement: Figure 1—source data 1. [file elife-69958-fig1-data1.xlsx]

## Sheet: Fig. 1B_REVIGO
TermID	Name	Frequency	PlotX	PlotY	PlotSize	Value	Uniqueness	Dispensability	Representative	Eliminated
GO:0001503	"ossification"	0.045	3.872	6.015	4.003	-21.478	0.818	0	-1	False
GO:0008152	"metabolic process"	63.536	2.58	-7.957	7.155	-2.465	1	0	-1	False
GO:0009653	"anatomical structure morphogenesis"	0.911	2.231	6.627	5.311	-34.579	0.726	0	-1	False
GO:0072359	"circulatory system development"	0.217	null	null	4.688	-17.952	0.707	0.706	9653	True
GO:0035295	"tube development"	0.223	null	null	4.7	-19.609	0.717	0.708	9653	True
GO:0060429	"epithelium development"	0.259	null	null	4.766	-10.044	0.735	0.718	9653	True
GO:0009790	"embryo development"	0.302	null	null	4.832	-3.31	0.711	0.728	9653	True
GO:0031214	"biomineral tissue development"	0.017	null	null	3.578	-8.411	0.734	0.732	9653	True
GO:0009888	"tissue development"	0.457	null	null	5.012	-24.079	0.74	0.758	9653	True
GO:0048762	"mesenchymal cell differentiation"	0.036	null	null	3.909	-2.47	0.715	0.773	9653	True
GO:0061448	"connective tissue development"	0.051	null	null	4.063	-8.496	0.763	0.793	9653	True
GO:0030154	"cell differentiation"	1.006	null	null	5.355	-13.678	0.711	0.798	9653	True
GO:0048869	"cellular developmental process"	1.023	null	null	5.362	-14.262	0.727	0.809	9653	True
GO:0000904	"cell morphogenesis involved in differentiation"	0.161	null	null	4.56	-7.049	0.726	0.822	9653	True
GO:0032989	"cellular component morphogenesis"	0.176	null	null	4.598	-8.999	0.71	0.829	9653	True
GO:0048731	"system development"	1.191	null	null	5.428	-32.532	0.679	0.838	9653	True
GO:0007399	"nervous system development"	0.541	null	null	5.085	-11.614	0.687	0.845	9653	True
GO:0002009	"morphogenesis of an epithelium"	0.133	null	null	4.477	-5.253	0.732	0.853	9653	True
GO:0048729	"tissue morphogenesis"	0.158	null	null	4.55	-6.961	0.731	0.865	9653	True
GO:0048513	"animal organ development"	0.734	null	null	5.218	-24.153	0.68	0.873	9653	True
GO:0061138	"morphogenesis of a branching epithelium"	0.034	null	null	3.882	-3.077	0.731	0.882	9653	True
GO:0120039	"plasma membrane bounded cell projection morphogenesis"	0.136	null	null	4.487	-3.403	0.706	0.884	9653	True
GO:0022008	"neurogenesis"	0.353	null	null	4.9	-7.606	0.683	0.885	9653	True
GO:0048666	"neuron development"	0.229	null	null	4.711	-7.009	0.688	0.885	9653	True
GO:0007275	"multicellular organism development"	1.587	null	null	5.553	-27.6	0.683	0.892	9653	True
GO:0048468	"cell development"	0.475	null	null	5.029	-8.042	0.723	0.912	9653	True
GO:0061564	"axon development"	0.122	null	null	4.439	-3.031	0.678	0.92	9653	True
GO:0048856	"anatomical structure development"	2.018	null	null	5.657	-28.825	0.715	0.923	9653	True
GO:0060562	"epithelial tube morphogenesis"	0.084	null	null	4.277	-2.311	0.706	0.941	9653	True
GO:0031175	"neuron projection development"	0.177	null	null	4.601	-6.321	0.671	0.947	9653	True
GO:0030182	"neuron differentiation"	0.275	null	null	4.791	-6.422	0.685	0.956	9653	True
GO:0032990	"cell part morphogenesis"	0.142	null	null	4.504	-3.236	0.71	0.962	9653	True
GO:0048699	"generation of neurons"	0.32	null	null	4.858	-6.73	0.683	0.967	9653	True
GO:0030282	"bone mineralization"	0.01	null	null	3.363	-6.371	0.735	0.972	9653	True
GO:0048858	"cell projection morphogenesis"	0.137	null	null	4.489	-3.564	0.706	0.993	9653	True
GO:0048812	"neuron projection morphogenesis"	0.135	null	null	4.484	-2.053	0.665	0.997	9653	True
GO:0009987	"cellular process"	82.432	-1.208	7.209	7.268	-10.461	1	0	-1	False
GO:0022610	"biological adhesion"	0.549	6.984	5.409	5.092	-19.025	1	0	-1	False
GO:0023052	"signaling"	7.023	0.17	7.461	6.199	-2.943	1	0	-1	False
GO:0030198	"extracellular matrix organization"	0.063	-6.062	-0.396	4.15	-29.317	0.959	0	-1	False
GO:0030199	"collagen fibril organization"	0.01	null	null	3.35	-18.697	0.961	0.886	30198	True
GO:0032501	"multicellular organismal process"	2.455	-4.848	-4.671	5.742	-9.077	1	0	-1	False
GO:0032502	"developmental process"	2.243	-0.978	-0.96	5.703	-27.076	1	0	-1	False
GO:0040007	"growth"	0.12	-4.72	-5.3	4.433	-4.316	1	0	-1	False
GO:0040011	"locomotion"	1.012	-5.708	-3.555	5.357	-15.451	1	0	-1	False
GO:0050793	"regulation of developmental process"	1.304	6.399	0.032	5.468	-23.999	0.819	0	-1	False
GO:0051179	"localization"	18.989	-6.155	-2.914	6.631	-38.531	1	0	-1	False
GO:0065007	"biological regulation"	22.831	-4.016	-1.768	6.711	-6.84	1	0	-1	False
GO:0050673	"epithelial cell proliferation"	0.018	-5.48	-4.285	3.6	-2.554	0.997	0.004	-1	False
GO:0007155	"cell adhesion"	0.535	-0.742	6.392	5.081	-19.522	0.981	0.005	-1	False
GO:0034446	"substrate adhesion-dependent cell spreading"	0.01	null	null	3.373	-4.337	0.759	0.719	7155	True
GO:0031589	"cell-substrate adhesion"	0.055	null	null	4.093	-9.035	0.983	0.813	7155	True
GO:0098609	"cell-cell adhesion"	0.206	null	null	4.667	-4.092	0.982	0.907	7155	True
GO:0008283	"cell population proliferation"	0.1	-4.964	-2.692	4.353	-11.771	0.997	0.006	-1	False
GO:0016477	"cell migration"	0.208	-1.457	-5.489	4.67	-17.345	0.923	0.006	-1	False
GO:0001667	"ameboidal-type cell migration"	0.05	null	null	4.05	-2.579	0.931	0.733	16477	True
GO:0010631	"epithelial cell migration"	0.022	null	null	3.692	-2.694	0.764	0.769	16477	True
GO:0006935	"chemotaxis"	0.548	null	null	5.091	-3.823	0.931	0.799	16477	True
GO:0042330	"taxis"	0.552	null	null	5.094	-3.67	0.939	0.874	16477	True
GO:0048870	"cell motility"	0.62	null	null	5.144	-15.072	0.915	0.897	16477	True
GO:0090132	"epithelium migration"	0.023	null	null	3.705	-2.61	0.823	0.989	16477	True
GO:0006915	"apoptotic process"	0.215	-0.427	7.278	4.684	-4.81	0.99	0.006	-1	False
GO:0012501	"programmed cell death"	0.236	null	null	4.725	-4.434	0.99	0.984	6915	True
GO:0008219	"cell death"	0.244	-3.503	-2.854	4.74	-7.339	0.996	0.006	-1	False
GO:0030029	"actin filament-based process"	0.361	-1.895	6.922	4.91	-5.689	0.996	0.006	-1	False
GO:0009100	"glycoprotein metabolic process"	0.555	-4.437	3.976	5.096	-16.62	0.946	0.007	-1	False
GO:0006928	"movement of cell or subcellular component"	1.001	-1.041	-1.988	5.353	-16.265	0.996	0.007	-1	False
GO:0071840	"cellular component organization or biogenesis"	9.001	-4.372	-3.78	6.306	-9.738	0.995	0.01	-1	False
GO:0007154	"cell communication"	7.555	0.014	3.577	6.23	-2.417	0.995	0.014	-1	False
GO:0030574	"collagen catabolic process"	0.008	-2.436	-1.873	3.265	-3.446	0.995	0.023	-1	False
GO:0032963	"collagen metabolic process"	0.015	-3.119	-0.64	3.53	-8.836	0.995	0.024	-1	False
GO:0070085	"glycosylation"	0.655	-0.405	5.526	5.169	-5.408	0.993	0.032	-1	False
GO:0044272	"sulfur compound biosynthetic process"	1.368	-3.916	5.728	5.488	-2.876	0.971	0.053	-1	False
GO:1901135	"carbohydrate derivative metabolic process"	7.284	-1.028	4.435	6.215	-13.977	0.986	0.065	-1	False
GO:0044281	"small molecule metabolic process"	16.281	-6.104	-2.208	6.564	-6.826	0.989	0.075	-1	False
GO:0006793	"phosphorus metabolic process"	14.797	-1.724	0.37	6.522	-3.46	0.982	0.089	-1	False
GO:0005975	"carbohydrate metabolic process"	6.091	-3.234	1.056	6.137	-4.604	0.985	0.094	-1	False
GO:0043413	"macromolecule glycosylation"	0.507	-2.474	5.65	5.057	-5.321	0.971	0.13	-1	False
GO:0006796	"phosphate-containing compound metabolic process"	14.505	-0.779	0.705	6.514	-2.903	0.978	0.131	-1	False
GO:0016310	"phosphorylation"	8.291	null	null	6.271	-3.003	0.98	0.737	6796	True
GO:1901564	"organonitrogen compound metabolic process"	32.955	-2.496	2.942	6.87	-7.591	0.977	0.136	-1	False
GO:0043436	"oxoacid metabolic process"	9.315	-1.212	2.135	6.321	-2.278	0.977	0.146	-1	False
GO:0017185	"peptidyl-lysine hydroxylation"	0.002	-2.828	6.108	2.68	-2.91	0.979	0.191	-1	False
GO:0010810	"regulation of cell-substrate adhesion"	0.036	7.23	1.637	3.91	-5.022	0.848	0.2	-1	False
GO:1900024	"regulation of substrate adhesion-dependent cell spreading"	0.009	null	null	3.322	-2.676	0.806	0.773	10810	True
GO:0045785	"positive regulation of cell adhesion"	0.07	null	null	4.195	-3.366	0.774	0.875	10810	True
GO:0010811	"positive regulation of cell-substrate adhesion"	0.021	null	null	3.668	-2.028	0.79	0.892	10810	True
GO:0010770	"positive regulation of cell morphogenesis involved in differentiation"	0.011	null	null	3.38	-2.053	0.752	0.958	10810	True
GO:0030155	"regulation of cell adhesion"	0.128	7.714	-0.023	4.46	-6.807	0.846	0.223	-1	False
GO:0018126	"protein hydroxylation"	0.023	-3.041	5.426	3.723	-4.032	0.975	0.224	-1	False
GO:0030334	"regulation of cell migration"	0.165	7.219	0.948	4.571	-11.937	0.787	0.228	-1	False
GO:0051046	"regulation of secretion"	0.111	null	null	4.398	-3.654	0.805	0.745	30334	True
GO:0051270	"regulation of cellular component movement"	0.194	null	null	4.639	-11.261	0.795	0.778	30334	True
GO:1903530	"regulation of secretion by cell"	0.103	null	null	4.365	-3.288	0.797	0.779	30334	True
GO:0032880	"regulation of protein localization"	0.172	null	null	4.588	-3.13	0.801	0.781	30334	True
GO:0051050	"positive regulation of transport"	0.157	null	null	4.548	-2.668	0.738	0.804	30334	True
GO:0051049	"regulation of transport"	0.473	null	null	5.027	-5.07	0.785	0.849	30334	True
GO:0010632	"regulation of epithelial cell migration"	0.042	null	null	3.974	-2.001	0.757	0.891	30334	True
GO:1903532	"positive regulation of secretion by cell"	0.041	null	null	3.966	-3.107	0.753	0.926	30334	True
GO:0040017	"positive regulation of locomotion"	0.096	null	null	4.335	-5.849	0.767	0.93	30334	True
GO:0050708	"regulation of protein secretion"	0.044	null	null	3.993	-2.707	0.809	0.93	30334	True
GO:0051047	"positive regulation of secretion"	0.045	null	null	4.003	-2.132	0.756	0.931	30334	True
GO:0051272	"positive regulation of cellular component movement"	0.095	null	null	4.328	-5.845	0.74	0.933	30334	True
GO:0002791	"regulation of peptide secretion"	0.049	null	null	4.04	-2.697	0.812	0.937	30334	True
GO:0030335	"positive regulation of cell migration"	0.088	null	null	4.298	-6.37	0.739	0.94	30334	True
GO:2000145	"regulation of cell motility"	0.179	null	null	4.604	-11.578	0.786	0.979	30334	True
GO:2000147	"positive regulation of cell motility"	0.092	null	null	4.316	-6.249	0.738	0.992	30334	True
GO:0040012	"regulation of locomotion"	0.199	4.88	0.366	4.651	-11.353	0.846	0.232	-1	False
GO:0051674	"localization of cell"	0.62	-0.376	-6.986	5.144	-15.072	0.936	0.239	-1	False
GO:2000026	"regulation of multicellular organismal development"	0.278	4.799	-0.858	4.796	-18.21	0.753	0.24	-1	False
GO:0070167	"regulation of biomineral tissue development"	0.019	null	null	3.635	-2.397	0.789	0.717	2000026	True
GO:0051094	"positive regulation of developmental process"	0.241	null	null	4.735	-14.822	0.722	0.719	2000026	True
GO:0030278	"regulation of ossification"	0.025	null	null	3.744	-5.949	0.818	0.73	2000026	True
GO:0048522	"positive regulation of cellular process"	1.903	null	null	5.632	-12.673	0.721	0.76	2000026	True
GO:1901342	"regulation of vasculature development"	0.059	null	null	4.119	-4.587	0.773	0.777	2000026	True
GO:0051130	"positive regulation of cellular component organization"	0.316	null	null	4.851	-3.79	0.758	0.781	2000026	True
GO:0045765	"regulation of angiogenesis"	0.057	null	null	4.11	-4.095	0.772	0.787	2000026	True
GO:0051960	"regulation of nervous system development"	0.076	null	null	4.231	-3.606	0.769	0.802	2000026	True
GO:0022603	"regulation of anatomical structure morphogenesis"	0.902	null	null	5.307	-14.031	0.759	0.808	2000026	True
GO:0045595	"regulation of cell differentiation"	0.298	null	null	4.826	-13.04	0.775	0.814	2000026	True
GO:0051247	"positive regulation of protein metabolic process"	0.477	null	null	5.031	-2.991	0.749	0.816	2000026	True
GO:0032270	"positive regulation of cellular protein metabolic process"	0.461	null	null	5.016	-2.063	0.743	0.818	2000026	True
GO:0051241	"negative regulation of multicellular organismal process"	0.183	null	null	4.614	-10.253	0.768	0.849	2000026	True
GO:0051240	"positive regulation of multicellular organismal process"	0.251	null	null	4.752	-16.56	0.72	0.872	2000026	True
GO:0022604	"regulation of cell morphogenesis"	0.777	null	null	5.242	-4.026	0.76	0.895	2000026	True
GO:0008360	"regulation of cell shape"	0.746	null	null	5.225	-3.021	0.729	0.957	2000026	True
GO:0042127	"regulation of cell population proliferation"	0.302	7.366	-0.914	4.833	-13.902	0.835	0.242	-1	False
GO:0042981	"regulation of apoptotic process"	0.317	5.357	-1.293	4.853	-5.025	0.815	0.243	-1	False
GO:0010942	"positive regulation of cell death"	0.099	null	null	4.346	-2.282	0.759	0.888	42981	True
GO:0060548	"negative regulation of cell death"	0.184	null	null	4.618	-3.813	0.802	0.934	42981	True
GO:0043069	"negative regulation of programmed cell death"	0.168	null	null	4.579	-2.575	0.803	0.939	42981	True
GO:0043067	"regulation of programmed cell death"	0.329	null	null	4.869	-5.033	0.814	0.981	42981	True
GO:0043066	"negative regulation of apoptotic process"	0.163	null	null	4.564	-2.284	0.804	0.981	42981	True
GO:0010941	"regulation of cell death"	0.353	7.35	-0.458	4.9	-7.65	0.833	0.246	-1	False
GO:0048193	"Golgi vesicle transport"	0.356	-0.022	-6.513	4.904	-3.795	0.935	0.251	-1	False
GO:0006888	"endoplasmic reticulum to Golgi vesicle-mediated transport"	0.162	null	null	4.562	-2.872	0.932	0.706	48193	True
GO:0051239	"regulation of multicellular organismal process"	0.548	6.589	0.851	5.091	-22.645	0.833	0.257	-1	False
GO:0042592	"homeostatic process"	1.122	5.88	1.049	5.402	-6.282	0.798	0.258	-1	False
GO:0019220	"regulation of phosphate metabolic process"	0.663	6.469	-1.306	5.174	-4.703	0.8	0.262	-1	False
GO:0010562	"positive regulation of phosphorus metabolic process"	0.231	null	null	4.715	-4.068	0.749	0.899	19220	True
GO:0045937	"positive regulation of phosphate metabolic process"	0.231	null	null	4.715	-4.068	0.747	0.899	19220	True
GO:0001932	"regulation of protein phosphorylation"	0.411	null	null	4.966	-2.476	0.803	0.948	19220	True
GO:0042325	"regulation of phosphorylation"	0.458	null	null	5.013	-3.368	0.806	0.958	19220	True
GO:0001934	"positive regulation of protein phosphorylation"	0.183	null	null	4.614	-2.737	0.75	0.979	19220	True
GO:0042327	"positive regulation of phosphorylation"	0.208	null	null	4.67	-3.587	0.748	0.989	19220	True
GO:0032879	"regulation of localization"	0.703	6.843	0.431	5.199	-13.457	0.829	0.264	-1	False
GO:0009966	"regulation of signal transduction"	0.849	6.956	-1.115	5.281	-15.563	0.762	0.269	-1	False
GO:0070374	"positive regulation of ERK1 and ERK2 cascade"	0.031	null	null	3.846	-2.924	0.756	0.72	9966	True
GO:0090287	"regulation of cellular response to growth factor stimulus"	0.068	null	null	4.185	-2.074	0.817	0.731	9966	True
GO:0032102	"negative regulation of response to external stimulus"	0.072	null	null	4.209	-2.115	0.801	0.735	9966	True
GO:0032101	"regulation of response to external stimulus"	0.207	null	null	4.667	-3.241	0.806	0.806	9966	True
GO:0043408	"regulation of MAPK cascade"	0.148	null	null	4.522	-4.963	0.79	0.819	9966	True
GO:0048585	"negative regulation of response to stimulus"	0.402	null	null	4.956	-7.933	0.775	0.858	9966	True
GO:0048584	"positive regulation of response to stimulus"	0.465	null	null	5.019	-2.935	0.724	0.87	9966	True
GO:0009968	"negative regulation of signal transduction"	0.325	null	null	4.863	-5.454	0.762	0.881	9966	True
GO:0009967	"positive regulation of signal transduction"	0.327	null	null	4.866	-9.502	0.715	0.881	9966	True
GO:0023057	"negative regulation of signaling"	0.338	null	null	4.881	-5.746	0.782	0.883	9966	True
GO:0010648	"negative regulation of cell communication"	0.339	null	null	4.882	-5.816	0.777	0.884	9966	True
GO:0023056	"positive regulation of signaling"	0.356	null	null	4.903	-7.68	0.736	0.888	9966	True
GO:0010647	"positive regulation of cell communication"	0.358	null	null	4.906	-7.559	0.732	0.889	9966	True
GO:0043410	"positive regulation of MAPK cascade"	0.099	null	null	4.348	-4.914	0.736	0.889	9966	True
GO:0070372	"regulation of ERK1 and ERK2 cascade"	0.048	null	null	4.032	-4.222	0.804	0.894	9966	True
GO:1902531	"regulation of intracellular signal transduction"	0.451	null	null	5.007	-3.63	0.773	0.909	9966	True
GO:1902533	"positive regulation of intracellular signal transduction"	0.21	null	null	4.675	-2.761	0.723	0.945	9966	True
GO:0023051	"regulation of signaling"	0.944	6.192	0.447	5.327	-11.279	0.825	0.272	-1	False
GO:0007166	"cell surface receptor signaling pathway"	0.845	5.63	-2.781	5.279	-15.098	0.783	0.274	-1	False
GO:0010646	"regulation of cell communication"	0.941	5.869	-1.06	5.326	-11.211	0.819	0.277	-1	False
GO:0048583	"regulation of response to stimulus"	1.154	6.828	-0.067	5.414	-10.59	0.821	0.279	-1	False
GO:0051128	"regulation of cellular component organization"	0.988	6.61	-0.852	5.347	-6.836	0.818	0.281	-1	False
GO:0065008	"regulation of biological quality"	3.066	5.891	-0.002	5.839	-16.901	0.815	0.291	-1	False
GO:0006954	"inflammatory response"	0.09	4.498	-6.568	4.304	-4.275	0.966	0.304	-1	False
GO:0019538	"protein metabolic process"	20.195	-3.096	3.798	6.657	-3.966	0.968	0.305	-1	False
GO:0050790	"regulation of catalytic activity"	1.903	5.636	0.324	5.632	-4.198	0.817	0.306	-1	False
GO:0043085	"positive regulation of catalytic activity"	0.605	null	null	5.134	-3.29	0.835	0.78	50790	True
GO:0044093	"positive regulation of molecular function"	0.684	null	null	5.187	-2.902	0.834	0.79	50790	True
GO:0048518	"positive regulation of biological process"	2.07	5.679	-0.562	5.668	-13.684	0.811	0.31	-1	False
GO:0065009	"regulation of molecular function"	2.645	5.521	-0.152	5.775	-5.543	0.818	0.32	-1	False
GO:0033036	"macromolecule localization"	3.636	-0.665	-6.619	5.913	-12.594	0.924	0.321	-1	False
GO:0032940	"secretion by cell"	0.632	-0.793	-5.708	5.153	-6.708	0.926	0.321	-1	False
GO:0009306	"protein secretion"	0.409	null	null	4.964	-3.585	0.905	0.94	32940	True
GO:0002790	"peptide secretion"	0.412	null	null	4.967	-4.604	0.918	0.941	32940	True
GO:0046903	"secretion"	0.675	-0.251	-6.72	5.182	-7.926	0.937	0.324	-1	False
GO:0048519	"negative regulation of biological process"	2.519	6.049	-0.59	5.753	-11.11	0.808	0.324	-1	False
GO:0048523	"negative regulation of cellular process"	2.096	6.645	-0.443	5.674	-9.631	0.777	0.325	-1	False
GO:0051093	"negative regulation of developmental process"	0.183	null	null	4.615	-4.824	0.764	0.706	48523	True
GO:0050808	"synapse organization"	0.058	-5.916	0.341	4.118	-2.209	0.963	0.327	-1	False
GO:0043062	"extracellular structure organization"	0.064	-6.182	0.331	4.16	-27.349	0.962	0.329	-1	False
GO:0070371	"ERK1 and ERK2 cascade"	0.005	5.463	-4.005	3.017	-4.729	0.85	0.337	-1	False
GO:0016192	"vesicle-mediated transport"	1.336	-0.499	-6.038	5.478	-2.844	0.928	0.353	-1	False
GO:0009719	"response to endogenous stimulus"	0.514	4.663	-6.286	5.063	-2.652	0.961	0.356	-1	False
GO:0051174	"regulation of phosphorus metabolic process"	0.663	6.186	-1.353	5.174	-4.684	0.82	0.361	-1	False
GO:0006029	"proteoglycan metabolic process"	0.032	-4.945	3.822	3.857	-10.939	0.94	0.367	-1	False
GO:0009101	"glycoprotein biosynthetic process"	0.529	null	null	5.076	-9.823	0.923	0.777	6029	True
GO:0006487	"protein N-linked glycosylation"	0.115	null	null	4.414	-2.211	0.927	0.86	6029	True
GO:0006486	"protein glycosylation"	0.507	null	null	5.057	-5.321	0.918	0.981	6029	True
GO:0097435	"supramolecular fiber organization"	0.308	-5.814	0.041	4.841	-10.952	0.958	0.369	-1	False
GO:0051641	"cellular localization"	2.351	-0.903	-6.84	5.723	-8.559	0.925	0.381	-1	False
GO:0006044	"N-acetylglucosamine metabolic process"	0.063	-5.373	3.154	4.149	-2.878	0.961	0.386	-1	False
GO:0008104	"protein localization"	3.124	-0.54	-6.344	5.847	-11.019	0.911	0.397	-1	False
GO:0034613	"cellular protein localization"	1.711	null	null	5.585	-4.929	0.907	0.848	8104	True
GO:0070727	"cellular macromolecule localization"	1.72	null	null	5.588	-4.72	0.907	0.901	8104	True
GO:0045184	"establishment of protein localization"	2.927	null	null	5.819	-6.98	0.91	0.913	8104	True
GO:0051649	"establishment of localization in cell"	1.928	null	null	5.637	-2.681	0.916	0.914	8104	True
GO:0071705	"nitrogen compound transport"	4.658	-0.926	-6.587	6.02	-10.207	0.92	0.422	-1	False
GO:0000165	"MAPK cascade"	0.09	5.576	-3.304	4.307	-5.022	0.818	0.422	-1	False
GO:0009611	"response to wounding"	0.101	4.291	-6.597	4.355	-2.24	0.965	0.424	-1	False
GO:0046849	"bone remodeling"	0.01	4.125	6.022	3.335	-8.935	0.831	0.426	-1	False
GO:0045453	"bone resorption"	0.004	null	null	2.986	-5.278	0.711	0.885	46849	True
GO:0015833	"peptide transport"	3.142	-1.313	-6.358	5.849	-8.293	0.904	0.429	-1	False
GO:0071702	"organic substance transport"	5.734	null	null	6.111	-11.814	0.902	0.802	15833	True
GO:0042886	"amide transport"	3.202	null	null	5.858	-9.029	0.914	0.847	15833	True
GO:0015031	"protein transport"	2.84	null	null	5.805	-7.185	0.892	0.949	15833	True
GO:1901566	"organonitrogen compound biosynthetic process"	15.628	-3.555	4.207	6.546	-2.095	0.962	0.431	-1	False
GO:0042221	"response to chemical"	3.298	4.49	-6.128	5.87	-9.372	0.954	0.437	-1	False
GO:0010033	"response to organic substance"	0.953	4.238	-6.185	5.331	-4.417	0.95	0.444	-1	False
GO:0070887	"cellular response to chemical stimulus"	1.809	null	null	5.61	-3.734	0.941	0.761	10033	True
GO:0048771	"tissue remodeling"	0.019	3.995	6.156	3.642	-10.371	0.827	0.445	-1	False
GO:0030030	"cell projection organization"	0.67	-6.162	0.068	5.178	-8.92	0.955	0.449	-1	False
GO:0090130	"tissue migration"	0.024	3.899	5.869	3.736	-2.527	0.825	0.451	-1	False
GO:0050789	"regulation of biological process"	21.13	6.171	-0.374	6.677	-2.178	0.771	0.452	-1	False
GO:0030036	"actin cytoskeleton organization"	0.348	-6.187	-0.151	4.893	-5.822	0.954	0.454	-1	False
GO:0007015	"actin filament organization"	0.202	null	null	4.657	-4.644	0.953	0.944	30036	True
GO:0120036	"plasma membrane bounded cell projection organization"	0.35	-5.882	-0.19	4.896	-7.857	0.945	0.454	-1	False
GO:0007167	"enzyme linked receptor protein signaling pathway"	0.216	5.556	-3.081	4.687	-8.563	0.8	0.456	-1	False
GO:0007169	"transmembrane receptor protein tyrosine kinase signaling pathway"	0.136	null	null	4.485	-7.922	0.807	0.743	7167	True
GO:1905114	"cell surface receptor signaling pathway involved in cell-cell signaling"	0.169	null	null	4.579	-2.387	0.804	0.756	7167	True
GO:0007267	"cell-cell signaling"	0.32	6.197	-5.788	4.857	-2.263	0.973	0.469	-1	False
GO:0030203	"glycosaminoglycan metabolic process"	1.061	-4.621	3.475	5.378	-11.786	0.937	0.499	-1	False
GO:0006024	"glycosaminoglycan biosynthetic process"	0.793	null	null	5.251	-8.037	0.934	0.942	30203	True
GO:0006023	"aminoglycan biosynthetic process"	0.809	null	null	5.26	-8.555	0.934	0.944	30203	True
GO:0030001	"metal ion transport"	1.492	-1.526	-6.29	5.526	-4.15	0.916	0.534	-1	False
GO:0098662	"inorganic cation transmembrane transport"	2.274	null	null	5.709	-2.832	0.907	0.804	30001	True
GO:0006022	"aminoglycan metabolic process"	1.144	-4.518	3.609	5.41	-11.115	0.947	0.539	-1	False
GO:0006829	"zinc ion transport"	0.046	-2.007	-6.144	4.019	-3.814	0.94	0.541	-1	False
GO:0030316	"osteoclast differentiation"	0.008	2.998	6.251	3.256	-11.24	0.745	0.541	-1	False
GO:0002521	"leukocyte differentiation"	0.065	null	null	4.166	-2.508	0.711	0.781	30316	True
GO:0002573	"myeloid leukocyte differentiation"	0.024	null	null	3.725	-6.24	0.728	0.84	30316	True
GO:0001894	"tissue homeostasis"	0.041	4.819	3.442	3.96	-3.741	0.674	0.549	-1	False
GO:0001649	"osteoblast differentiation"	0.016	2.924	6.057	3.559	-5.066	0.753	0.553	-1	False
GO:0036075	"replacement ossification"	0.006	null	null	3.127	-2.629	0.831	0.835	1649	True
GO:0071363	"cellular response to growth factor stimulus"	0.107	4.04	-6.196	4.382	-3.948	0.951	0.574	-1	False
GO:0016043	"cellular component organization"	7.326	-6.02	-0.002	6.217	-11.444	0.949	0.575	-1	False
GO:0098660	"inorganic ion transmembrane transport"	2.651	-1.284	-6.122	5.776	-3.056	0.91	0.578	-1	False
GO:0010769	"regulation of cell morphogenesis involved in differentiation"	0.015	7.29	-2.513	3.518	-2.042	0.819	0.582	-1	False
GO:0006810	"transport"	18.119	-0.893	-6.371	6.61	-23.221	0.901	0.583	-1	False
GO:0055085	"transmembrane transport"	13.277	null	null	6.475	-6.746	0.902	0.746	6810	True
GO:0051234	"establishment of localization"	18.248	null	null	6.613	-22.492	0.903	0.79	6810	True
GO:0050654	"chondroitin sulfate proteoglycan metabolic process"	0.01	-5.087	3.663	3.35	-5.244	0.937	0.598	-1	False
GO:0030204	"chondroitin sulfate metabolic process"	0.007	null	null	3.217	-4.762	0.927	0.859	50654	True
GO:0030166	"proteoglycan biosynthetic process"	0.026	null	null	3.762	-4.915	0.931	0.92	50654	True
GO:0030206	"chondroitin sulfate biosynthetic process"	0.005	null	null	3.089	-2.264	0.928	0.953	50654	True
GO:0050650	"chondroitin sulfate proteoglycan biosynthetic process"	0.008	null	null	3.255	-2.668	0.934	0.972	50654	True
GO:0006812	"cation transport"	3.571	-1.272	-6.491	5.905	-6.058	0.911	0.603	-1	False
GO:0060348	"bone development"	0.038	3.168	6.277	3.933	-16.248	0.721	0.608	-1	False
GO:0060349	"bone morphogenesis"	0.019	null	null	3.636	-7.384	0.72	0.825	60348	True
GO:0048705	"skeletal system morphogenesis"	0.057	null	null	4.112	-10.666	0.703	0.884	60348	True
GO:0051216	"cartilage development"	0.042	null	null	3.98	-8.299	0.71	0.89	60348	True
GO:0060350	"endochondral bone morphogenesis"	0.012	null	null	3.42	-7.453	0.728	0.894	60348	True
GO:0002062	"chondrocyte differentiation"	0.014	null	null	3.504	-4.721	0.721	0.911	60348	True
GO:0060351	"cartilage development involved in endochondral bone morphogenesis"	0.006	null	null	3.16	-2.697	0.73	0.915	60348	True
GO:0001958	"endochondral ossification"	0.006	null	null	3.127	-2.629	0.731	0.934	60348	True
GO:0001763	"morphogenesis of a branching structure"	0.038	3.511	6.308	3.934	-3.484	0.743	0.608	-1	False
GO:0035556	"intracellular signal transduction"	3.862	5.689	-2.505	5.939	-6.291	0.75	0.62	-1	False
GO:0007165	"signal transduction"	6.903	null	null	6.191	-5.041	0.734	0.833	35556	True
GO:0048592	"eye morphogenesis"	0.051	3.318	6.29	4.061	-2.803	0.711	0.632	-1	False
GO:0090596	"sensory organ morphogenesis"	0.078	null	null	4.247	-2.353	0.704	0.874	48592	True
GO:0001654	"eye development"	0.105	null	null	4.374	-2.126	0.71	0.948	48592	True
GO:0072001	"renal system development"	0.064	3.15	6.018	4.157	-4.693	0.724	0.634	-1	False
GO:0072009	"nephron epithelium development"	0.021	null	null	3.671	-2.08	0.726	0.918	72001	True
GO:0072073	"kidney epithelium development"	0.027	null	null	3.781	-2.534	0.722	0.933	72001	True
GO:0001822	"kidney development"	0.06	null	null	4.127	-3.671	0.718	0.983	72001	True
GO:0001655	"urogenital system development"	0.07	3.417	5.999	4.195	-6.159	0.729	0.639	-1	False
GO:0006082	"organic acid metabolic process"	9.556	-1.118	2.274	6.332	-2.221	0.977	0.644	-1	False
GO:1901137	"carbohydrate derivative biosynthetic process"	4.817	-4.743	3.858	6.035	-8.872	0.94	0.647	-1	False
GO:0007224	"smoothened signaling pathway"	0.024	5.474	-3.578	3.74	-3.844	0.829	0.655	-1	False
GO:0034220	"ion transmembrane transport"	5.548	-1.16	-6.271	6.096	-5.236	0.902	0.658	-1	False
GO:0001501	"skeletal system development"	0.113	3.299	6.126	4.405	-31.367	0.72	0.666	-1	False
GO:0001568	"blood vessel development"	0.115	3.285	5.971	4.414	-17.363	0.712	0.667	-1	False
GO:0060840	"artery development"	0.018	null	null	3.607	-2.299	0.743	0.867	1568	True
GO:0001944	"vasculature development"	0.126	null	null	4.452	-17.952	0.711	0.911	1568	True
GO:0007507	"heart development"	0.125	null	null	4.447	-2.62	0.703	0.916	1568	True
GO:0001525	"angiogenesis"	0.071	null	null	4.204	-11.393	0.708	0.952	1568	True
GO:0048514	"blood vessel morphogenesis"	0.095	null	null	4.331	-14.989	0.703	0.972	1568	True
GO:0046850	"regulation of bone remodeling"	0.008	3.536	-0.493	3.237	-2.502	0.83	0.674	-1	False
GO:0070848	"response to growth factor"	0.11	3.994	-6.345	4.393	-3.549	0.956	0.675	-1	False
GO:0071310	"cellular response to organic substance"	0.658	null	null	5.17	-2.252	0.944	0.779	70848	True
GO:0008285	"negative regulation of cell population proliferation"	0.124	7.532	0.491	4.447	-8.039	0.815	0.68	-1	False
GO:0050678	"regulation of epithelial cell proliferation"	0.057	null	null	4.107	-2.373	0.848	0.817	8285	True
GO:0008284	"positive regulation of cell population proliferation"	0.15	null	null	4.528	-5.283	0.764	0.877	8285	True
GO:0000041	"transition metal ion transport"	0.531	-1.686	-6.253	5.077	-2.899	0.925	0.681	-1	False
GO:0034103	"regulation of tissue remodeling"	0.01	3.643	-0.709	3.348	-2.144	0.828	0.686	-1	False
GO:1903510	"mucopolysaccharide metabolic process"	0.024	-5.025	3.19	3.739	-8.969	0.953	0.687	-1	False
GO:0098771	"inorganic ion homeostasis"	0.484	5.948	1.378	5.037	-6.128	0.794	0.688	-1	False
GO:0019725	"cellular homeostasis"	0.709	null	null	5.203	-5.529	0.79	0.864	98771	True
GO:0048878	"chemical homeostasis"	0.62	null	null	5.145	-5.223	0.796	0.885	98771	True
GO:0055076	"transition metal ion homeostasis"	0.236	null	null	4.725	-2.857	0.806	0.927	98771	True
GO:0055082	"cellular chemical homeostasis"	0.412	null	null	4.967	-3.219	0.795	0.934	98771	True
GO:0050801	"ion homeostasis"	0.499	null	null	5.05	-5.625	0.795	0.95	98771	True
GO:0006873	"cellular ion homeostasis"	0.368	null	null	4.918	-3.121	0.796	0.965	98771	True
GO:0055065	"metal ion homeostasis"	0.37	null	null	4.92	-3.589	0.799	0.965	98771	True
GO:0030003	"cellular cation homeostasis"	0.326	null	null	4.866	-2.351	0.798	0.965	98771	True
GO:0055080	"cation homeostasis"	0.446	null	null	5.001	-5.185	0.796	0.982	98771	True
GO:0045597	"positive regulation of cell differentiation"	0.147	6.851	-1.888	4.519	-9.32	0.715	0.69	-1	False
GO:0045670	"regulation of osteoclast differentiation"	0.011	null	null	3.387	-3.885	0.783	0.741	45597	True
GO:2001206	"positive regulation of osteoclast development"	0.001	null	null	2.27	-2.082	0.767	0.818	45597	True
GO:0051962	"positive regulation of nervous system development"	0.044	null	null	3.999	-3.911	0.721	0.844	45597	True
GO:0010720	"positive regulation of cell development"	0.048	null	null	4.034	-4.933	0.733	0.849	45597	True
GO:0060284	"regulation of cell development"	0.088	null	null	4.297	-4.692	0.783	0.855	45597	True
GO:1902105	"regulation of leukocyte differentiation"	0.047	null	null	4.028	-3.323	0.765	0.879	45597	True
GO:0045672	"positive regulation of osteoclast differentiation"	0.005	null	null	3.036	-3.218	0.747	0.894	45597	True
GO:0002761	"regulation of myeloid leukocyte differentiation"	0.02	null	null	3.651	-2.927	0.776	0.912	45597	True
GO:0050769	"positive regulation of neurogenesis"	0.035	null	null	3.891	-2.071	0.494	0.915	45597	True
GO:0050767	"regulation of neurogenesis"	0.059	null	null	4.124	-2.287	0.522	0.948	45597	True
GO:0035239	"tube morphogenesis"	0.171	3.488	6.151	4.584	-18.594	0.706	0.691	-1	False
GO:0009887	"animal organ morphogenesis"	0.239	null	null	4.731	-17.436	0.687	0.75	35239	True
GO:0048568	"embryonic organ development"	0.124	null	null	4.447	-4.84	0.708	0.767	35239	True
GO:0007423	"sensory organ development"	0.158	null	null	4.552	-2.62	0.705	0.782	35239	True
GO:0048646	"anatomical structure formation involved in morphogenesis"	0.397	null	null	4.951	-15.359	0.726	0.805	35239	True
GO:0000902	"cell morphogenesis"	0.311	null	null	4.845	-9.404	0.731	0.824	35239	True
GO:0043009	"chordate embryonic development"	0.148	null	null	4.521	-2.251	0.722	0.876	35239	True
GO:0048706	"embryonic skeletal system development"	0.041	null	null	3.965	-2.135	0.722	0.898	35239	True
GO:0008589	"regulation of smoothened signaling pathway"	0.019	7.795	-1.695	3.634	-2.727	0.819	0.694	-1	False
GO:0006811	"ion transport"	10.217	-0.857	-6.238	6.361	-8.891	0.91	0.697	-1	False
GO:0048871	"multicellular organismal homeostasis"	0.062	4.863	3.314	4.145	-2.036	0.667	0.698	-1	False

## Sheet: Fig. 1C
Process	Negative regulation of _x000B_cellular process	Regulation of _x000B_cell proliferation	Regulation of _x000B_cell death	Regulation of _x000B_apoptotic process	Negative regulation of cell _x000B_population proliferation
p-value	9.13e-09	9.44622e-06	2.24e-08	1.25353e-14	2.34e-10

## Sheet: Fig. 1D
	baseMean	log2FoldChange	lfcSE	stat	pvalue	padj
Col10a1	27153.8	-7.05518	0.799625	-8.82312	1.11316e-18	1.64676e-17		Ctrl. Vs. Day 14
Snorc	479.986	-6.13783	0.722502	-8.49525	1.97512e-17	2.58855e-16		log2fc ≥ 8, base mean ≥ 10, padj ≤0.05
Clec3a	2601.11	-6.11982	0.839412	-7.2906	3.08577e-13	2.56686e-12
R3hdml	83.7135	-5.91425	0.766166	-7.71928	1.16991e-14	1.16611e-13
Panx3	1449.48	-5.73706	0.393421	-14.5825	3.62968e-48	9.32964e-46
Matn1	121.496	-5.2548	0.77803	-6.75398	1.43843e-11	9.89905e-11
Col9a1	6909.06	-5.17896	0.66241	-7.81835	5.35191e-15	5.54974e-14
Meltf	236.134	-4.982	1.0256	-4.85764	1.18794e-06	4.50278e-06
Ppp1r1b	68.0951	-4.91876	0.996696	-4.93507	8.01216e-07	3.1115e-06
Col9a2	5562.69	-4.89315	0.647816	-7.55329	4.24383e-14	3.91854e-13
Cnmd	1843.57	-4.86148	0.622443	-7.81032	5.70429e-15	5.89138e-14
Col9a3	5304.16	-4.75788	0.620225	-7.67122	1.70368e-14	1.66032e-13
Matn3	3020.07	-4.73003	0.514664	-9.1905	3.91003e-20	6.84855e-19
Brinp3	120.81	-4.66528	0.378088	-12.3391	5.57607e-35	3.95382e-33
Scn1a	62.5884	-4.54762	0.267273	-17.0149	6.36611e-65	5.95029e-62
Ihh	310.907	-4.35493	0.335967	-12.9624	1.9995e-38	2.05579e-36
Tcfl5	47.3799	-4.30897	0.330196	-13.0497	6.37866e-39	6.86724e-37
Foxa3	48.7686	-4.2769	0.452995	-9.44138	3.67886e-21	7.00448e-20
Raet1d	11.274	-4.2343	0.609416	-6.94812	3.70184e-12	2.72347e-11
Gal	28.5741	-4.18549	0.314034	-13.3282	1.58745e-40	2.09248e-38
Steap1	64.1809	-4.17317	0.332307	-12.5582	3.58557e-36	2.81412e-34
Sstr2	23.6769	-4.16406	0.315532	-13.1969	9.13626e-40	1.07354e-37
Mia	98.2757	-4.11513	0.760852	-5.40858	6.35253e-08	2.85711e-07
Hapln1	3469.23	-4.08829	0.61087	-6.69257	2.19287e-11	1.48085e-10
Pde11a	31.2011	-3.97654	0.49643	-8.01028	1.14447e-15	1.26798e-14
Moxd1	711.463	-3.94459	0.348632	-11.3145	1.11252e-29	4.68788e-28
Prkg2	428.898	-3.9325	0.538725	-7.29965	2.88523e-13	2.40881e-12
Frzb	977.115	-3.89391	0.279613	-13.9261	4.39847e-44	8.0755e-42
Ocstamp	329.679	-3.86297	0.284416	-13.5821	5.11441e-42	7.62084e-40
Slc5a7	19.1703	-3.78768	0.525131	-7.21283	5.48019e-13	4.44007e-12
Ptgs2	1851.82	-3.76129	0.197388	-19.0553	5.93766e-81	2.03493e-77
Ooep	14.4567	-3.74105	0.43335	-8.63285	5.984e-18	8.25832e-17
Acan	18504	-3.72599	0.5512	-6.75978	1.38198e-11	9.5329e-11
Dcstamp	264.77	-3.68145	0.286029	-12.8709	6.5642e-38	6.52075e-36
Sox11	127.56	-3.67253	0.284311	-12.9173	3.59525e-38	3.6063e-36
Pkhd1	30.4299	-3.65682	0.489222	-7.47477	7.73365e-14	6.89623e-13
Epyc	72.9927	-3.65425	1.03088	-3.54477	0.000392954	0.00104789
Mt3	198.703	-3.60281	0.240518	-14.9794	1.00153e-50	3.43242e-48
Map3k21	75.7589	-3.58923	0.3257	-11.0201	3.05851e-28	1.11117e-26
1520401A03Rik	21.5135	-3.58226	0.431594	-8.30007	1.04046e-16	1.27276e-15
Ucma	356.632	-3.5676	0.576414	-6.1893	6.04311e-10	3.46237e-09
Nell1	25.5241	-3.48065	0.301256	-11.5538	7.06395e-31	3.45847e-29
Cdkn2a	27.8988	-3.46333	0.318129	-10.8865	1.3363e-27	4.49727e-26
Gzmc	19.3707	-3.45671	0.527556	-6.5523	5.66574e-11	3.65906e-10
Adm2	15.7069	-3.45651	0.635745	-5.43694	5.42023e-08	2.45498e-07
Msln	56.5592	-3.41341	0.286665	-11.9073	1.08412e-32	6.22704e-31
Rbp4	389.557	-3.40805	0.276015	-12.3473	5.03665e-35	3.59613e-33
Wdr72	26.3308	-3.32595	0.393665	-8.44868	2.94612e-17	3.80535e-16
Slitrk6	385.784	-3.29509	0.238857	-13.7952	2.72244e-43	4.44297e-41
Ctsk	14304.8	-3.27135	0.250153	-13.0774	4.43556e-39	4.90368e-37
Chga	11.4383	-3.23844	0.640129	-5.05904	4.21381e-07	1.69833e-06
Oscar	242.393	-3.16861	0.287785	-11.0103	3.4071e-28	1.23345e-26
Bcan	137.205	-3.15528	0.311621	-10.1254	4.26354e-24	1.05121e-22
Slc18a1	65.7885	-3.09984	0.243578	-12.7263	4.22485e-37	3.71264e-35
Mest	4026.77	-3.09937	0.164724	-18.8156	5.6302e-79	1.28638e-75
AI593442	47.0806	-3.09206	0.378477	-8.16974	3.09051e-16	3.6211e-15
Mmp13	11879.3	-3.0425	0.281413	-10.8115	3.03623e-27	9.97348e-26
Slc9b2	732.078	-3.03199	0.282804	-10.7211	8.09962e-27	2.57423e-25
Ckb	3621.92	-3.01082	0.227998	-13.2055	8.15708e-40	9.80901e-38
Atp6v0d2	1202.91	-2.96378	0.262112	-11.3073	1.20761e-29	5.05744e-28
Ptgs2os	15.4002	-2.95899	0.431245	-6.86152	6.8133e-12	4.8748e-11
Carmil1	841.104	-2.93562	0.138649	-21.173	1.69451e-99	1.74221e-95
Loxl4	2601.25	-2.9239	0.287624	-10.1657	2.82127e-24	7.09215e-23
Acp5	12525.5	-2.92299	0.28667	-10.1963	2.05885e-24	5.25262e-23
Drd4	19.8245	-2.92067	0.320757	-9.10555	8.58299e-20	1.44429e-18
Gsg1l	113.953	-2.91498	0.255872	-11.3923	4.56563e-30	2.01034e-28
Scin	380.876	-2.90811	0.244214	-11.908	1.07505e-32	6.19221e-31
Comp	12878.7	-2.89816	0.375875	-7.71043	1.2539e-14	1.24681e-13
Pcolce2	660.19	-2.8939	0.334432	-8.65319	5.00783e-18	6.97669e-17
Ibsp	38425.3	-2.89245	0.225451	-12.8296	1.11923e-37	1.07046e-35
Mmp9	13994.1	-2.87645	0.248022	-11.5976	4.24033e-31	2.16362e-29
Bdh2	57.3882	-2.87643	0.23905	-12.0327	2.39089e-33	1.45887e-31
Slc37a2	2582.09	-2.86405	0.219464	-13.0502	6.34047e-39	6.86206e-37
Cdsn	24.1127	-2.86082	0.376512	-7.59821	3.00256e-14	2.83349e-13
Cyp2s1	72.059	-2.83651	0.284894	-9.95639	2.365e-23	5.47652e-22
Rarres1	52.8289	-2.78805	0.237756	-11.7265	9.32192e-32	5.08453e-30
Gzme	52.6181	-2.77473	0.448995	-6.17986	6.41567e-10	3.65748e-09
Col2a1	66468.5	-2.77101	0.722875	-3.83331	0.000126428	0.000364415
Gm10635	12.9586	-2.77088	0.330676	-8.37945	5.31754e-17	6.68365e-16
Fkbp11	374.313	-2.76923	0.208006	-13.3132	1.93966e-40	2.5085e-38
Adamts16	91.3272	-2.75905	0.421916	-6.53933	6.17965e-11	3.97598e-10
Matn4	844.445	-2.74843	0.202683	-13.5603	6.88613e-42	1.01142e-39
Mmp12	55.4298	-2.74304	0.360806	-7.60254	2.90379e-14	2.74784e-13
Cthrc1	2028.19	-2.73985	0.256697	-10.6735	1.35425e-26	4.21931e-25
Anxa8	1013.71	-2.71614	0.263082	-10.3243	5.47174e-25	1.45557e-23
Gpnmb	809.977	-2.69316	0.232336	-11.5917	4.54098e-31	2.30559e-29
Bcl2a1b	48.36	-2.69183	0.220136	-12.2281	2.20156e-34	1.48917e-32
Dcx	10.3574	-2.68192	0.587577	-4.56437	5.00994e-06	1.74846e-05
Gramd2	80.5816	-2.64996	0.282846	-9.36892	7.32767e-21	1.36608e-19
Lrrc55	45.6516	-2.6457	0.359929	-7.35061	1.97307e-13	1.68419e-12
Kcne3	46.1202	-2.64203	0.241206	-10.9534	6.39855e-28	2.23006e-26
Aplnr	1269.46	-2.63314	0.342076	-7.69752	1.38731e-14	1.36731e-13
Agtr2	30.6741	-2.63241	0.404534	-6.50727	7.65275e-11	4.85091e-10
Mymx	36.0382	-2.61192	0.534585	-4.88589	1.02962e-06	3.93752e-06
C1qtnf3	10860.4	-2.61164	0.25328	-10.3113	6.266e-25	1.65827e-23
Siglec15	151.667	-2.60371	0.377394	-6.89916	5.23093e-12	3.79413e-11
Adamts18	183.927	-2.59152	0.236463	-10.9595	5.98283e-28	2.09226e-26
Tm4sf19	214.783	-2.50978	0.227435	-11.0352	2.58545e-28	9.47674e-27
Tnfrsf9	62.9624	-2.50742	0.254233	-9.86269	6.04076e-23	1.34871e-21
Tspan6	586.99	-2.48986	0.141971	-17.5378	7.37542e-69	7.98215e-66
Cd68	1747.66	-2.487	0.165591	-15.019	5.51474e-51	1.95517e-48
Cstb	602.509	-2.48399	0.193458	-12.84	9.79146e-38	9.49726e-36
Snx10	1020.8	-2.48317	0.171468	-14.4819	1.57762e-47	3.86197e-45
Spint1	51.5115	-2.48076	0.346081	-7.16816	7.60145e-13	6.06082e-12
Nipal2	23.4546	-2.47965	0.271957	-9.1178	7.66672e-20	1.29754e-18
Mymk	103.596	-2.47902	0.45667	-5.42848	5.68366e-08	2.5709e-07
Fabp7	16.7866	-2.47152	0.22194	-11.136	8.38263e-29	3.20991e-27
Notum	103.915	-2.46253	0.183423	-13.4254	4.29324e-41	5.88546e-39
Hpgd	902.726	-2.46199	0.232451	-10.5914	3.26532e-26	9.78787e-25
Cgref1	1446.95	-2.45209	0.235066	-10.4315	1.78106e-25	5.03077e-24
Gm19316	218.034	-2.44932	0.247674	-9.88931	4.6322e-23	1.04328e-21
Nebl	91.9334	-2.43695	0.229758	-10.6066	2.77763e-26	8.41183e-25
Aldoc	103.931	-2.43648	0.190852	-12.7664	2.52634e-37	2.32955e-35
Capn6	1813.72	-2.42106	0.199335	-12.1457	6.04451e-34	3.94582e-32
Rufy4	201.042	-2.41986	0.212751	-11.3741	5.62533e-30	2.45591e-28
Serpine2	5423.44	-2.40597	0.140048	-17.1796	3.77491e-66	3.69635e-63
Tfpi2	287.098	-2.40432	0.271354	-8.86047	7.96787e-19	1.19769e-17
Shtn1	421.265	-2.4043	0.187151	-12.8468	8.9611e-38	8.73304e-36
Timp1	2555.68	-2.39259	0.198297	-12.0657	1.60258e-33	9.986e-32
Rab38	106.691	-2.37465	0.18316	-12.9649	1.93495e-38	2.00952e-36
Unc5c	281.041	-2.37247	0.244034	-9.7219	2.43212e-22	5.17183e-21
Prnd	195.662	-2.36287	0.324855	-7.27362	3.49988e-13	2.89374e-12
Gm10494	11.8824	-2.3628	0.311346	-7.58899	3.22397e-14	3.02577e-13
Hexb	1830.59	-2.35863	0.12947	-18.2176	3.74395e-74	6.99881e-71
Mgarp	29.3007	-2.35072	0.510458	-4.60513	4.1221e-06	1.45216e-05
Bcat1	768.022	-2.34307	0.254894	-9.19234	3.84392e-20	6.73849e-19
Glb1	923.072	-2.32384	0.163035	-14.2536	4.25691e-46	8.93212e-44
Spp1	25840.1	-2.31648	0.231191	-10.0198	1.2479e-23	2.96311e-22
Cemip	1069.2	-2.31553	0.279145	-8.29508	1.08508e-16	1.32576e-15
Pmaip1	122.851	-2.30997	0.204947	-11.2711	1.82379e-29	7.51557e-28
Ffar4	47.7872	-2.30908	0.249329	-9.26117	2.02205e-20	3.64093e-19
Adgrv1	10.1091	-2.30853	0.418802	-5.51222	3.54342e-08	1.64683e-07
Hapln3	22.3577	-2.2957	0.257082	-8.92981	4.26745e-19	6.65793e-18
Cd109	2978.06	-2.28367	0.158822	-14.3788	7.02955e-47	1.6061e-44
Scube1	301.525	-2.27486	0.428245	-5.31205	1.08399e-07	4.74256e-07
Krt18	15.3519	-2.27439	0.472238	-4.81619	1.46327e-06	5.47973e-06
Pak3	279.313	-2.26972	0.193695	-11.718	1.03042e-31	5.57591e-30
Clca2	22.1567	-2.26347	0.308856	-7.32855	2.3265e-13	1.96953e-12
Srpx2	1844.34	-2.26047	0.127856	-17.6798	5.99704e-70	7.25395e-67
Mmp3	81.937	-2.25846	0.38353	-5.8886	3.89478e-09	2.02653e-08
Nmb	77.0563	-2.2581	0.211523	-10.6754	1.32644e-26	4.15153e-25
Srd5a1	89.0941	-2.25486	0.149253	-15.1076	1.44248e-51	5.2038e-49
Myh8	850.169	-2.23426	0.472292	-4.73068	2.23768e-06	8.15986e-06
Pcdh17	192.199	-2.23137	0.132445	-16.8476	1.09289e-63	9.77095e-61
Hey1	293.882	-2.23126	0.23179	-9.62618	6.19888e-22	1.25708e-20
Gpr137b-ps	437.774	-2.228	0.156053	-14.2772	3.03556e-46	6.50211e-44
Gpr137b	332.407	-2.22733	0.184106	-12.0981	1.08091e-33	6.87304e-32
Atp6v1a	2740.13	-2.22356	0.134153	-16.5748	1.05936e-61	7.77983e-59
Ccl9	1027.32	-2.21861	0.226853	-9.77994	1.37286e-22	2.98415e-21
C2cd4a	10.1991	-2.21554	0.322285	-6.87449	6.22134e-12	4.46525e-11
Epha3	883.603	-2.21328	0.174201	-12.7053	5.52617e-37	4.81502e-35
Cfap45	48.4871	-2.20616	0.229067	-9.63105	5.91246e-22	1.20255e-20
Fblim1	498.589	-2.19211	0.1364	-16.0712	4.06093e-58	2.25689e-55
Lgi3	25.207	-2.19178	0.245672	-8.92157	4.59739e-19	7.14046e-18
Nyap2	65.3238	-2.17872	0.306134	-7.11687	1.10406e-12	8.63222e-12
Aldh1l2	1294.65	-2.17184	0.163219	-13.3063	2.1268e-40	2.73334e-38
Clec4n	205.693	-2.17136	0.276375	-7.85659	3.94746e-15	4.14987e-14
Hhip	120.691	-2.16781	0.370113	-5.85714	4.70894e-09	2.42682e-08
Stra6l	24.9328	-2.16559	0.345129	-6.27473	3.50249e-10	2.06662e-09
St18	39.0182	-2.16012	0.214982	-10.0479	9.38312e-24	2.26196e-22
Eef1akmt3	40.7814	-2.15338	0.219575	-9.80704	1.05e-22	2.29205e-21
4933407I18Rik	32.2012	-2.15193	0.302844	-7.10575	1.19673e-12	9.3037e-12
Insl6	10.7142	-2.1463	0.330119	-6.50158	7.94813e-11	5.03194e-10
Efcab1	10.1038	-2.14409	0.389148	-5.50971	3.59434e-08	1.66878e-07
Dlk1	62.5212	-2.13789	0.351196	-6.08745	1.1472e-09	6.39291e-09
Tnfrsf11a	708.114	-2.1316	0.189157	-11.269	1.86752e-29	7.68038e-28
Enc1	756.405	-2.12507	0.173512	-12.2474	1.73466e-34	1.18504e-32
Nlrp10	24.5729	-2.12309	0.283122	-7.49885	6.43784e-14	5.81129e-13
Smpd3	5344.29	-2.12057	0.279785	-7.57931	3.4739e-14	3.24257e-13
Atp6v1b2	1652.94	-2.11954	0.126053	-16.8147	1.90403e-63	1.63136e-60
Hapln4	112.598	-2.11818	0.284713	-7.43971	1.00904e-13	8.86328e-13
Rnd1	243.186	-2.11471	0.167263	-12.643	1.22306e-36	1.00599e-34
Susd5	1428.11	-2.11006	0.299067	-7.05548	1.72011e-12	1.31783e-11
Syt6	114.13	-2.10416	0.244954	-8.59	8.69672e-18	1.18745e-16
Lbhd2	12.9225	-2.10287	0.35511	-5.92174	3.18562e-09	1.67577e-08
Dlk2	26.3747	-2.09137	0.40568	-5.15522	2.5334e-07	1.05305e-06
Gm2115	36.7335	-2.07863	0.282633	-7.35451	1.91632e-13	1.6378e-12
Mex3a	328.854	-2.07478	0.196049	-10.583	3.57377e-26	1.06969e-24
Mme	799.57	-2.06612	0.169959	-12.1566	5.29392e-34	3.46684e-32
Galnt6	515.448	-2.06589	0.163125	-12.6645	9.30679e-37	7.87301e-35
Fam167a	590.899	-2.06482	0.234417	-8.80829	1.27065e-18	1.86899e-17
Ifi30	1591.44	-2.05985	0.144991	-14.2067	8.32726e-46	1.67876e-43
Car12	1060.8	-2.05957	0.534364	-3.85425	0.000116086	0.000336397
Ephb1	36.73	-2.05314	0.214745	-9.56082	1.16822e-21	2.31874e-20
Gpx7	633.478	-2.05219	0.19102	-10.7434	6.36839e-27	2.05256e-25
Mdfi	498.254	-2.05167	0.169635	-12.0946	1.12794e-33	7.13013e-32
Chrng	79.8879	-2.05159	0.438761	-4.67587	2.92704e-06	1.05335e-05
Mst1r	418.185	-2.04836	0.258103	-7.93619	2.08486e-15	2.25875e-14
Slc14a2	16.7358	-2.04702	0.228881	-8.94361	3.76661e-19	5.90341e-18
Efna4	49.5902	-2.04043	0.194592	-10.4857	1.00484e-25	2.90204e-24
Hoxb2	131.523	-2.03867	0.200838	-10.1508	3.28557e-24	8.20913e-23
Sgsm1	52.5359	-2.03783	0.156259	-13.0414	7.11618e-39	7.58187e-37
Cldn2	23.111	-2.03656	0.400728	-5.08215	3.73192e-07	1.5145e-06
Has2	492.034	-2.03482	0.212354	-9.58221	9.49907e-22	1.90009e-20
Gm20056	130.798	-2.03263	0.152593	-13.3206	1.75647e-40	2.28597e-38
Arsb	2058.21	-2.03181	0.190348	-10.6741	1.34488e-26	4.20286e-25
Rab11fip4	406.896	-2.03039	0.176984	-11.4721	1.8213e-30	8.45405e-29
Sgms2	7985.16	-2.02683	0.198769	-10.1969	2.0467e-24	5.22812e-23
Fkbp7	669.878	-2.02137	0.188358	-10.7315	7.23905e-27	2.31864e-25
Kcnh2	146.856	-2.02071	0.169235	-11.9403	7.29955e-33	4.26422e-31
Sox9	595.002	-2.01378	0.283391	-7.106	1.19458e-12	9.2905e-12
Tubb6	3127.67	-2.0129	0.13503	-14.9071	2.96411e-50	9.83079e-48
Lurap1l	224.171	-2.00681	0.180837	-11.0974	1.29192e-28	4.84776e-27
Sdc1	1223.49	-1.99816	0.176547	-11.318	1.0692e-29	4.51459e-28
Tmem86a	519.519	-1.98774	0.145555	-13.6563	1.85085e-42	2.86158e-40
Tead2	362.461	-1.98552	0.111756	-17.7665	1.28427e-70	1.65052e-67
Prss46	39.5041	-1.98226	0.271559	-7.29955	2.88739e-13	2.40964e-12
Tox	32.8033	-1.97558	0.261079	-7.56696	3.82052e-14	3.5516e-13
Fn1	75404.1	-1.96919	0.175537	-11.2181	3.32401e-29	1.33239e-27
Prdm1	251.578	-1.968	0.179123	-10.9869	4.41913e-28	1.57488e-26
Klf14	24.9211	-1.96703	0.366094	-5.37303	7.74241e-08	3.44753e-07
Apln	826.614	-1.96578	0.260548	-7.54479	4.53008e-14	4.17562e-13
Cdr2l	1382.39	-1.96145	0.149236	-13.1432	1.86123e-39	2.13813e-37
Fkbp10	4470.36	-1.959	0.164159	-11.9336	7.9117e-33	4.59571e-31
Akr1b8	275.12	-1.94501	0.131226	-14.8219	1.05803e-49	3.15309e-47
Kdelr3	1323.1	-1.94441	0.17583	-11.0585	1.99496e-28	7.36803e-27
Creb3l3	85.2993	-1.94071	0.278544	-6.96733	3.23013e-12	2.39615e-11
Tnc	49493.3	-1.94049	0.14376	-13.4982	1.60321e-41	2.26862e-39
Col18a1	2715.77	-1.94003	0.111747	-17.3609	1.63177e-67	1.67771e-64
Gale	423.044	-1.93505	0.188842	-10.2469	1.22145e-24	3.18741e-23
Lrrc66	10.7165	-1.93331	0.344567	-5.61083	2.01357e-08	9.62907e-08
Smpdl3b	151.119	-1.92762	0.188162	-10.2445	1.25306e-24	3.26573e-23
Tbx20	13.784	-1.92053	0.35561	-5.40066	6.63945e-08	2.97964e-07
Serpinh1	24178.2	-1.92008	0.194626	-9.86547	5.87562e-23	1.31327e-21
Slc13a3	64.8815	-1.91916	0.210214	-9.12954	6.87929e-20	1.17296e-18
Dusp4	199.117	-1.91372	0.188019	-10.1784	2.47706e-24	6.24979e-23
Cdkn2b	101.815	-1.90754	0.198228	-9.62291	6.39918e-22	1.29642e-20
Gpr153	1993.62	-1.9014	0.131897	-14.4157	4.1197e-47	9.73717e-45
Oit3	32.4373	-1.90087	0.221076	-8.59829	8.09119e-18	1.10698e-16
Veph1	12.1551	-1.8993	0.368305	-5.15685	2.51134e-07	1.04451e-06
Jdp2	1196.72	-1.89903	0.130382	-14.5651	4.6799e-48	1.18806e-45
Odaph	18.7585	-1.89805	0.532653	-3.56339	0.000366096	0.000980723
Tsku	856.781	-1.89463	0.152652	-12.4115	2.26484e-35	1.67525e-33
Ranbp3l	51.3483	-1.89236	0.224858	-8.41579	3.90245e-17	4.98423e-16
Fcrlb	34.8944	-1.89202	0.331771	-5.70279	1.17865e-08	5.79964e-08
Gm10554	97.1675	-1.89076	0.160959	-11.7468	7.33485e-32	4.01134e-30
Ccr1	1161.63	-1.8882	0.183779	-10.2743	9.20155e-25	2.41341e-23
Ccdc80	7840.12	-1.888	0.172087	-10.9712	5.25724e-28	1.84794e-26
Trpa1	18.6109	-1.88609	0.454416	-4.15057	3.31645e-05	0.000103484
Tcf7	223.709	-1.88568	0.204902	-9.20283	3.48636e-20	6.1326e-19
Creg2	24.1084	-1.88558	0.233338	-8.08091	6.42847e-16	7.2751e-15
Pheta1	423.208	-1.88525	0.13279	-14.1973	9.52488e-46	1.90155e-43
Mmp16	721.494	-1.88507	0.195682	-9.63332	5.783e-22	1.17972e-20
Cyp4v3	322.992	-1.88426	0.149993	-12.5623	3.4012e-36	2.69298e-34
Rbp1	222.436	-1.87517	0.212408	-8.82814	1.06429e-18	1.57787e-17
Ifitm5	520.947	-1.87238	0.244775	-7.6494	2.01926e-14	1.94665e-13
Maged2	1586.67	-1.86372	0.134227	-13.8848	7.82966e-44	1.38794e-41
Avpr1a	104.057	-1.85707	0.235311	-7.892	2.9738e-15	3.16349e-14
Fscn1	1932.93	-1.85283	0.169202	-10.9504	6.61283e-28	2.28922e-26
Gm10616	11.1383	-1.84115	0.440229	-4.18224	2.88647e-05	9.06729e-05
Ppic	2725.39	-1.84053	0.176843	-10.4077	2.28592e-25	6.36067e-24
P3h1	2604.57	-1.83829	0.16786	-10.9514	6.54615e-28	2.26996e-26
Pycr1	338.146	-1.83777	0.167115	-10.997	3.95077e-28	1.41533e-26
Dusp9	62.207	-1.83774	0.190529	-9.64544	5.13886e-22	1.05459e-20
Serf1	144.626	-1.83482	0.165459	-11.0893	1.41439e-28	5.28804e-27
Lxn	346.234	-1.83326	0.151909	-12.0681	1.55621e-33	9.72657e-32
Vcan	5368.48	-1.82662	0.164996	-11.0707	1.74097e-28	6.45037e-27
Rpl39l	101.228	-1.82533	0.273043	-6.68514	2.30709e-11	1.55442e-10
Tacr1	23.8096	-1.8192	0.264328	-6.88236	5.88695e-12	4.23116e-11
Ctsz	3566.65	-1.818	0.101216	-17.9616	3.89357e-72	5.33757e-69
Serpinb8	134.487	-1.81715	0.146541	-12.4003	2.60506e-35	1.91314e-33
Atp6v1c1	912.258	-1.81373	0.0949667	-19.0985	2.59609e-81	1.06767e-77
Capg	1801.52	-1.81345	0.109019	-16.6343	3.93282e-62	3.11041e-59
Tmem98	225.348	-1.81191	0.143739	-12.6056	1.96777e-36	1.58679e-34
Nrn1	151.184	-1.81017	0.283899	-6.37611	1.8164e-10	1.10407e-09
Spin2c	10.7369	-1.8088	0.29881	-6.05333	1.41883e-09	7.79884e-09
Podnl1	671.867	-1.80481	0.162063	-11.1364	8.33963e-29	3.1994e-27
A630023A22Rik	10.2196	-1.80465	0.457742	-3.9425	8.06369e-05	0.000238993
Tmem26	216.709	-1.80346	0.196666	-9.17017	4.7226e-20	8.16058e-19
Rcn1	2125.99	-1.80226	0.135987	-13.2531	4.32712e-40	5.39264e-38
Eps8l2	269.669	-1.80216	0.289816	-6.21829	5.02612e-10	2.89989e-09
C430049B03Rik	278.25	-1.79548	0.197444	-9.09361	9.58084e-20	1.60171e-18
Arfgef3	116.292	-1.78479	0.205067	-8.70343	3.21992e-18	4.56945e-17
Nipal1	13.9717	-1.7842	0.344243	-5.18298	2.18366e-07	9.14887e-07
Dgki	170.364	-1.78326	0.257729	-6.91913	4.54424e-12	3.32301e-11
Slc25a43	27.0763	-1.783	0.199222	-8.94979	3.56157e-19	5.59912e-18
Pth1r	3844.63	-1.78172	0.188598	-9.44716	3.48152e-21	6.65339e-20
Plb1	25.3637	-1.77823	0.240654	-7.38916	1.47755e-13	1.27552e-12
Rcor2	411.286	-1.77267	0.236857	-7.48412	7.2027e-14	6.44233e-13
Piezo2	955.644	-1.77223	0.161461	-10.9762	4.9757e-28	1.76102e-26
Tmem255a	46.1473	-1.77143	0.186795	-9.48328	2.46409e-21	4.75766e-20
Papss2	1930.72	-1.77031	0.168237	-10.5227	6.7873e-26	1.98531e-24
P3h4	1422.86	-1.7685	0.147871	-11.9597	5.77709e-33	3.38445e-31
Serpind1	37.5118	-1.76627	0.169945	-10.3932	2.66328e-25	7.32153e-24
Gpx8	868.411	-1.75361	0.158577	-11.0584	1.99581e-28	7.36803e-27
Hexa	3079.3	-1.75019	0.0997002	-17.5545	5.4972e-69	6.27994e-66
Ostc	950.798	-1.74977	0.166076	-10.5359	5.90089e-26	1.73343e-24
Gusb	1360.99	-1.74912	0.10587	-16.5214	2.57348e-61	1.70705e-58
Colec12	2471.59	-1.74842	0.128882	-13.5661	6.36314e-42	9.41333e-40
Corin	21.0638	-1.7483	0.237875	-7.34967	1.9869e-13	1.6953e-12
Nid2	1208.3	-1.74197	0.155209	-11.2234	3.12934e-29	1.25934e-27
Card14	137.723	-1.74141	0.237756	-7.32436	2.40038e-13	2.0254e-12
Adam12	2843.33	-1.74088	0.165262	-10.5341	6.01796e-26	1.7653e-24
Kcns1	140.241	-1.73634	0.316723	-5.48221	4.20036e-08	1.9314e-07
Pabpc4l	63.6659	-1.73143	0.150255	-11.5233	1.00709e-30	4.79368e-29
Csf1r	4155.77	-1.73118	0.149704	-11.564	6.27295e-31	3.0933e-29
Alpl	4931.79	-1.72578	0.202358	-8.52835	1.48445e-17	1.97699e-16
Ces2e	19.7868	-1.72571	0.285395	-6.04674	1.47809e-09	8.11154e-09
Lgmn	3326.78	-1.725	0.143764	-11.9989	3.60228e-33	2.1659e-31
Trpv4	626.925	-1.72321	0.215932	-7.98036	1.45909e-15	1.59729e-14
Slc46a1	133.657	-1.72295	0.151759	-11.3532	7.14617e-30	3.0742e-28
Gm19705	23.5457	-1.72181	0.226751	-7.5934	3.1161e-14	2.92854e-13
Itgav	4668.1	-1.72142	0.122248	-14.0814	4.93989e-45	9.40547e-43
Tgfbr1	2317.8	-1.72107	0.104721	-16.4348	1.07708e-60	6.92128e-58
Adamts9	1516.38	-1.7205	0.134062	-12.8336	1.06253e-37	1.02097e-35
Fam102a	1359.31	-1.71819	0.16421	-10.4633	1.27311e-25	3.64842e-24
Fkbp14	1005.42	-1.71736	0.181085	-9.48372	2.45382e-21	4.74229e-20
Atp6v1h	763.283	-1.71712	0.108179	-15.873	9.74456e-57	5.13788e-54
Pcolce	4925.98	-1.71388	0.159028	-10.7772	4.40997e-27	1.43258e-25
S100a4	944.818	-1.71283	0.187532	-9.13356	6.62799e-20	1.13199e-18
Antxrl	11.8752	-1.71215	0.384916	-4.44811	8.66278e-06	2.914e-05
Crtap	1897.68	-1.71207	0.146861	-11.6577	2.09547e-31	1.09087e-29
Pdgfrl	595.642	-1.71141	0.156861	-10.9104	1.02847e-27	3.49562e-26
Fam167b	89.5682	-1.71036	0.199414	-8.57694	9.74313e-18	1.32418e-16
Rai14	1843.81	-1.70952	0.0897709	-19.0431	7.4922e-81	2.20089e-77
Tax1bp3	66.6848	-1.70795	0.152132	-11.2267	3.01478e-29	1.21794e-27
St8sia2	62.7552	-1.70723	0.238672	-7.15303	8.48809e-13	6.7131e-12
Trem2	247.666	-1.70419	0.237861	-7.16463	7.79945e-13	6.20186e-12
Prdx4	573.304	-1.70406	0.150097	-11.353	7.16286e-30	3.07495e-28
Bmp1	4886.85	-1.70389	0.137904	-12.3556	4.54198e-35	3.26562e-33
Peg12	101.167	-1.70341	0.147321	-11.5626	6.37792e-31	3.13005e-29
Atp6v0e	1149.22	-1.70054	0.123051	-13.8198	1.93721e-43	3.23861e-41
Zfp57	56.7682	-1.69877	0.191087	-8.89005	6.1081e-19	9.32448e-18
Tceal9	1066.63	-1.69803	0.118179	-14.3683	8.18387e-47	1.84928e-44
Efemp2	1654.03	-1.69609	0.138986	-12.2033	2.98332e-34	1.99824e-32
Ephb2	520.364	-1.69097	0.167395	-10.1017	5.42949e-24	1.32283e-22
Snx7	601.97	-1.69037	0.14358	-11.773	5.37726e-32	2.98039e-30
Efna3	16.585	-1.68857	0.275198	-6.13585	8.47066e-10	4.77473e-09
Raet1e	12.7627	-1.68811	0.298927	-5.64722	1.63059e-08	7.89679e-08
Klhl13	735.704	-1.68405	0.185915	-9.05816	1.32665e-19	2.17196e-18
Spats2	226.779	-1.68402	0.123448	-13.6415	2.26777e-42	3.48001e-40
Gldn	60.4689	-1.68344	0.310011	-5.43027	5.62703e-08	2.5464e-07
Pdia5	334.567	-1.68316	0.134107	-12.5509	3.93128e-36	3.07372e-34
Vkorc1	826.142	-1.68248	0.16595	-10.1385	3.72954e-24	9.26214e-23
Ttyh2	823.55	-1.68215	0.108762	-15.4663	5.85702e-54	2.56251e-51
Adamts4	1269.7	-1.68037	0.239011	-7.0305	2.05794e-12	1.56095e-11
Bok	316.363	-1.6798	0.152877	-10.988	4.36629e-28	1.55875e-26
Krt7	10.9158	-1.6735	0.356972	-4.68805	2.75817e-06	9.94325e-06
Tnfsf11	274.766	-1.67056	0.253157	-6.5989	4.14208e-11	2.71167e-10
Il12rb1	34.6067	-1.66968	0.240242	-6.94998	3.65345e-12	2.6898e-11
Ppm1e	494.822	-1.66545	0.175573	-9.48583	2.40469e-21	4.66047e-20
Slc4a2	1958.68	-1.66312	0.109268	-15.2205	2.58601e-52	1.00332e-49
Tspan10	10.3798	-1.66272	0.393376	-4.22681	2.37032e-05	7.5264e-05
Pi15	495.26	-1.66181	0.219666	-7.56517	3.87361e-14	3.59932e-13
Lif	431.141	-1.65952	0.22466	-7.38678	1.50422e-13	1.29745e-12
Lpar4	202.55	-1.65877	0.248107	-6.68572	2.29794e-11	1.54876e-10
Gnptab	1440.14	-1.6558	0.103676	-15.9709	2.03718e-57	1.10238e-54
Gpr68	253.418	-1.65522	0.135845	-12.1846	3.75445e-34	2.4824e-32
Sdc2	1824.78	-1.65482	0.134837	-12.2727	1.26925e-34	8.72895e-33
Tcirg1	3064.97	-1.65098	0.152342	-10.8374	2.28958e-27	7.59366e-26
Ms4a7	312.179	-1.64738	0.220409	-7.47421	7.76667e-14	6.92268e-13
Olfml3	4902.7	-1.64173	0.126094	-13.0199	9.42876e-39	9.94275e-37
Chst5	35.1819	-1.64112	0.320471	-5.12096	3.0399e-07	1.24869e-06
Cd63	2849.93	-1.63919	0.112111	-14.6211	2.06075e-48	5.43271e-46
Cbr3	86.8671	-1.63878	0.154687	-10.5941	3.17261e-26	9.52384e-25
2810025M15Rik	175.982	-1.63788	0.111569	-14.6804	8.60678e-49	2.35975e-46
Tmem97	291.081	-1.63473	0.160903	-10.1597	2.99961e-24	7.53125e-23
Igsf11	19.4138	-1.63395	0.224114	-7.29069	3.08361e-13	2.5661e-12
Rftn2	621.772	-1.63335	0.157879	-10.3455	4.38412e-25	1.17844e-23
Kazald1	927.398	-1.63321	0.232954	-7.01085	2.36875e-12	1.78159e-11
Marcksl1	697.371	-1.63179	0.15128	-10.7865	3.98677e-27	1.29787e-25
C130050O18Rik	359.143	-1.63054	0.126785	-12.8607	7.49051e-38	7.36973e-36
Neto2	128.402	-1.63036	0.14628	-11.1455	7.53492e-29	2.89609e-27
Tent5a	2430.05	-1.6302	0.160659	-10.1469	3.41965e-24	8.5131e-23
C77080	397.95	-1.6299	0.157352	-10.3583	3.83915e-25	1.04286e-23
Scrn1	142.943	-1.62966	0.179319	-9.08803	1.00854e-19	1.6847e-18
Gabrb3	109.021	-1.62894	0.23168	-7.03099	2.05067e-12	1.55601e-11
Adcy3	872.99	-1.62735	0.146214	-11.1299	8.97119e-29	3.42253e-27
Bcar3	736.098	-1.62709	0.135802	-11.9813	4.45153e-33	2.63795e-31
Kcnj15	194.949	-1.62683	0.267816	-6.07444	1.2442e-09	6.89608e-09
Syt8	38.7211	-1.62638	0.607193	-2.67852	0.00739475	0.0155941
Hyal1	226.385	-1.62616	0.144324	-11.2675	1.89977e-29	7.78187e-28
Ccdc116	77.4628	-1.62388	0.193595	-8.38801	4.94453e-17	6.24535e-16
Crocc2	13.018	-1.62194	0.349971	-4.6345	3.57809e-06	1.27206e-05
Peg10	444.825	-1.61994	0.144336	-11.2234	3.12951e-29	1.25934e-27
Inava	12.6102	-1.6192	0.594785	-2.72232	0.00648246	0.0138262
Pkp1	19.946	-1.61918	0.664165	-2.43791	0.0147723	0.0291548
Msi1	152.02	-1.61901	0.205367	-7.8835	3.18333e-15	3.37764e-14
Rcn3	6019.83	-1.61497	0.15545	-10.389	2.78216e-25	7.62793e-24
Nt5dc2	1042.64	-1.61326	0.185353	-8.70369	3.21276e-18	4.56242e-17
Kdelr2	4361.65	-1.61028	0.133987	-12.0182	2.85221e-33	1.725e-31
Qsox1	2088.19	-1.60665	0.108759	-14.7726	2.2011e-49	6.28629e-47
Cybrd1	257.001	-1.60483	0.18334	-8.7533	2.07198e-18	3.00678e-17
Lpar3	131.566	-1.60288	0.167365	-9.57716	9.97479e-22	1.99331e-20
Armcx2	831.704	-1.59971	0.126387	-12.6573	1.01979e-36	8.48988e-35
Fmn1	499.705	-1.59892	0.111032	-14.4005	5.13387e-47	1.19963e-44
Zim1	429.777	-1.5958	0.216186	-7.38161	1.56388e-13	1.34609e-12
Antxr2	2150.34	-1.59577	0.108318	-14.7322	4.00443e-49	1.11275e-46
Eva1a	72.3804	-1.5955	0.186521	-8.55399	1.18907e-17	1.60439e-16
Ddah1	573.718	-1.59533	0.193375	-8.24995	1.5846e-16	1.90886e-15
Srpx	960.915	-1.5947	0.178879	-8.91494	4.88077e-19	7.55747e-18
Arsi	545.914	-1.59368	0.283811	-5.6153	1.96218e-08	9.40082e-08
Hey2	44.9134	-1.59288	0.228203	-6.98012	2.94933e-12	2.19736e-11
Ncald	151.59	-1.59216	0.108654	-14.6536	1.27794e-48	3.41277e-46
Vash2	178.061	-1.58905	0.180663	-8.79568	1.42184e-18	2.08688e-17
Sparc	59706.6	-1.5856	0.205655	-7.71003	1.25789e-14	1.24957e-13
Sp6	267.092	-1.58423	0.206157	-7.68459	1.53487e-14	1.50508e-13
Pde9a	53.0416	-1.5838	0.1765	-8.97335	2.87635e-19	4.56024e-18
Lox	11808	-1.58376	0.199374	-7.94365	1.96319e-15	2.13029e-14
Cdh2	1408.83	-1.57918	0.184124	-8.57671	9.76238e-18	1.32592e-16
Npc2	3316.36	-1.57754	0.100812	-15.6484	3.40519e-55	1.66717e-52
Prss50	50.5507	-1.57724	0.265651	-5.93728	2.89784e-09	1.53262e-08
Arf4	2641.6	-1.57707	0.119501	-13.1972	9.10684e-40	1.07354e-37
Tmem263	1465.99	-1.57477	0.140846	-11.1808	5.06357e-29	1.99086e-27
Gask1b	1479.67	-1.5745	0.167685	-9.38961	6.02244e-21	1.12786e-19
Kank4	113.608	-1.5742	0.251876	-6.24988	4.10777e-10	2.39898e-09
Olfml2b	3971.67	-1.57377	0.141922	-11.089	1.41854e-28	5.2939e-27
Eva1b	487.724	-1.56887	0.142321	-11.0235	2.94396e-28	1.07525e-26
St8sia6	128.992	-1.56883	0.189802	-8.26564	1.3895e-16	1.6827e-15
Nudt22	187.348	-1.56542	0.122254	-12.8047	1.54325e-37	1.44904e-35
Cd276	993.379	-1.56485	0.154771	-10.1108	4.95027e-24	1.21182e-22
Fkbp9	5455.79	-1.55659	0.13641	-11.4111	3.67896e-30	1.64457e-28
Mdk	372.446	-1.55643	0.204084	-7.62638	2.41441e-14	2.30383e-13
Ttc26	132.14	-1.5552	0.132891	-11.7028	1.2336e-31	6.62311e-30
Gabrb2	35.5863	-1.55517	0.411888	-3.7757	0.000159556	0.000454049
Papss1	744.598	-1.55268	0.128325	-12.0996	1.06175e-33	6.78039e-32
Shc2	696.256	-1.5523	0.132774	-11.6912	1.41295e-31	7.46902e-30
Clcn7	1319.86	-1.55132	0.0821285	-18.8889	1.40762e-79	3.6181e-76
Aspg	91.7219	-1.54988	0.274755	-5.64097	1.69096e-08	8.17571e-08
Ppib	1172.01	-1.54674	0.145713	-10.615	2.53802e-26	7.72031e-25
Disp2	25.7735	-1.54102	0.293598	-5.24876	1.5313e-07	6.55454e-07
Kazn	262.673	-1.54038	0.137522	-11.201	4.03165e-29	1.60664e-27
Plxnb1	880.297	-1.54021	0.20374	-7.5597	4.03993e-14	3.7471e-13
Akr1c13	23.8006	-1.53655	0.225815	-6.80448	1.01418e-11	7.09579e-11
1700066M21Rik	253.639	-1.53336	0.206227	-7.43529	1.04339e-13	9.16104e-13
Lrrc17	769.445	-1.53157	0.207859	-7.36831	1.72805e-13	1.48305e-12
Maged1	5881.45	-1.53087	0.123714	-12.3742	3.60482e-35	2.61929e-33
Galnt12	70.6249	-1.52912	0.152744	-10.011	1.36351e-23	3.22274e-22
Slc16a7	155.556	-1.52696	0.149763	-10.1958	2.07003e-24	5.27461e-23
Traf1	159.422	-1.52334	0.113415	-13.4316	3.94716e-41	5.44735e-39
Slc25a5	1310.16	-1.52247	0.121194	-12.5623	3.40503e-36	2.69298e-34
Reps2	341.3	-1.52075	0.115181	-13.2031	8.41518e-40	1.00024e-37
Adgrl3	73.4928	-1.52051	0.241889	-6.28599	3.25772e-10	1.92884e-09
Trps1	3152.34	-1.5184	0.103516	-14.6683	1.02909e-48	2.78436e-46
Id3	2995.39	-1.51531	0.170391	-8.89311	5.9422e-19	9.09824e-18
Vat1l	20.0077	-1.51445	0.430047	-3.52159	0.000428963	0.00113626
Adamts7	262.181	-1.51118	0.129135	-11.7023	1.23975e-31	6.63879e-30
Aldh1a3	551.755	-1.50799	0.293353	-5.14051	2.73987e-07	1.13155e-06
Galnt5	398.39	-1.50141	0.129634	-11.5819	5.09079e-31	2.55946e-29
Gfra4	45.5618	-1.50087	0.189587	-7.91648	2.44325e-15	2.62902e-14
Uap1l1	554.034	-1.50026	0.115289	-13.013	1.03201e-38	1.08272e-36
Sec16b	787.258	-1.50013	0.117231	-12.7964	1.71717e-37	1.60501e-35
Nt5e	976.107	-1.49411	0.241421	-6.18881	6.06216e-10	3.47232e-09
Sh3bgrl2	403.141	-1.49374	0.132565	-11.268	1.8886e-29	7.75155e-28
Slc6a2	158.432	-1.49365	0.250695	-5.95805	2.55261e-09	1.36124e-08
Creb3l1	1002.02	-1.49143	0.209963	-7.10327	1.21841e-12	9.46153e-12
Fxyd5	1815.73	-1.4894	0.113921	-13.0739	4.64132e-39	5.10371e-37
Rhod	156.05	-1.48774	0.173259	-8.58677	8.94499e-18	1.21973e-16
4930404N11Rik	296.641	-1.48764	0.135103	-11.0112	3.37502e-28	1.22399e-26
Serpinf1	7291.56	-1.48465	0.189291	-7.84321	4.39162e-15	4.58633e-14
Atp6v0b	1769.86	-1.48272	0.0759108	-19.5324	5.82881e-85	2.99644e-81
Rom1	265.806	-1.48024	0.124116	-11.9262	8.6391e-33	5.00411e-31
Ctsa	3169.94	-1.48005	0.0815611	-18.1465	1.36776e-73	2.34376e-70
Ncmap	101.411	-1.47997	0.562613	-2.63053	0.00852514	0.017736
Gxylt2	460.736	-1.47862	0.159974	-9.24286	2.40003e-20	4.28774e-19
Myo1e	2276.95	-1.47802	0.103108	-14.3347	1.32802e-46	2.90511e-44
Galm	101.728	-1.47729	0.147213	-10.035	1.06937e-23	2.56586e-22
Pla2g4a	582.764	-1.4696	0.135073	-10.88	1.43494e-27	4.8135e-26
Emcn	497.046	-1.46521	0.138292	-10.5951	3.14106e-26	9.44294e-25
Galnt3	264.486	-1.46504	0.171917	-8.52179	1.57105e-17	2.08422e-16
Sp7	1982.91	-1.46443	0.181311	-8.07687	6.64499e-16	7.50362e-15
Tmem119	2495.98	-1.46422	0.190203	-7.69823	1.37963e-14	1.36129e-13
Crmp1	20.1944	-1.4641	0.27104	-5.40178	6.59843e-08	2.96252e-07
A630014C17Rik	11.2293	-1.46334	0.318402	-4.5959	4.30888e-06	1.51459e-05
Ydjc	169.092	-1.462	0.145875	-10.0222	1.21709e-23	2.8933e-22
Pimreg	147.766	-1.46089	0.142237	-10.2708	9.54069e-25	2.49599e-23
A130050O07Rik	123.368	-1.46078	0.235719	-6.19715	5.74937e-10	3.29869e-09
1810062G17Rik	16.2105	-1.4605	0.263508	-5.54253	2.98139e-08	1.39586e-07
Angpt4	130.623	-1.45957	0.229714	-6.35385	2.09991e-10	1.26666e-09
Atp6v0c	871.138	-1.45819	0.116318	-12.5362	4.73013e-36	3.67041e-34
Slc35f2	28.6262	-1.4575	0.250379	-5.82119	5.84308e-09	2.97404e-08
Grb10	6749.2	-1.45717	0.132207	-11.0218	2.99836e-28	1.09318e-26
Lrrc42	242.166	-1.4571	0.130014	-11.2073	3.75525e-29	1.4994e-27
Slc2a10	419.841	-1.45512	0.142857	-10.1859	2.29341e-24	5.82214e-23
Oaf	434.054	-1.45343	0.135647	-10.7148	8.67325e-27	2.75228e-25
Cpz	756.296	-1.45172	0.335656	-4.32501	1.52526e-05	4.97128e-05
Ephx4	14.764	-1.44852	0.262662	-5.51475	3.49285e-08	1.62497e-07
Csrp2	934.072	-1.44805	0.178619	-8.10691	5.19218e-16	5.93479e-15
Mydgf	804.72	-1.44684	0.11371	-12.724	4.35262e-37	3.80863e-35
Ankrd55	13.427	-1.44219	0.273018	-5.2824	1.27504e-07	5.52321e-07
Clba1	58.3138	-1.44165	0.180419	-7.99057	1.3432e-15	1.47702e-14
Slc39a1	2170.29	-1.44103	0.0861581	-16.7254	8.56542e-63	7.04523e-60
Ccbe1	226.941	-1.44079	0.158992	-9.06201	1.28066e-19	2.10169e-18
Tnmd	809.542	-1.43839	0.316121	-4.55013	5.36124e-06	1.86316e-05
Heyl	356.647	-1.4374	0.162366	-8.85287	8.52985e-19	1.27842e-17
Gm6682	10.4026	-1.43605	0.366762	-3.91547	9.02285e-05	0.000265622
St6galnac4	1212.8	-1.43578	0.0966498	-14.8554	6.41374e-50	1.95822e-47
Ptch1	747.353	-1.43544	0.170607	-8.41369	3.97318e-17	5.06513e-16
Mfsd12	552.352	-1.43494	0.125521	-11.4318	2.89935e-30	1.31031e-28
Renbp	291.799	-1.43404	0.118986	-12.0521	1.89088e-33	1.16414e-31
Adamts12	956.102	-1.43061	0.122033	-11.7231	9.70529e-32	5.27963e-30
Ikbip	1100.88	-1.4302	0.118654	-12.0535	1.85971e-33	1.14839e-31
Ssr2	2210.82	-1.42837	0.113467	-12.5884	2.44555e-36	1.96437e-34
Lctl	16.7657	-1.4275	0.244241	-5.84466	5.07604e-09	2.60471e-08
Atp6ap2	1042.52	-1.42729	0.111867	-12.7588	2.78445e-37	2.53348e-35
Praf2	339.578	-1.42712	0.116975	-12.2002	3.10066e-34	2.07009e-32
Golm1	933.076	-1.42264	0.106183	-13.398	6.21502e-41	8.29867e-39
Hilpda	323.147	-1.42187	0.165604	-8.58596	9.00787e-18	1.22749e-16
Tceal8	710.258	-1.4214	0.114142	-12.4529	1.349e-35	1.00505e-33
Slc12a8	27.1874	-1.42112	0.226112	-6.28505	3.27746e-10	1.93941e-09
Lamb1	2898.13	-1.41925	0.154755	-9.17095	4.68866e-20	8.10875e-19
Tmie	219.174	-1.41815	0.214094	-6.62396	3.49702e-11	2.30922e-10
Mamdc2	604.205	-1.41764	0.196786	-7.204	5.84717e-13	4.71511e-12
Chsy1	2934.03	-1.41534	0.139371	-10.1552	3.141e-24	7.86703e-23
1110008P14Rik	352.485	-1.41271	0.106932	-13.2113	7.55277e-40	9.13574e-38
Ctxn1	44.0114	-1.41249	0.161848	-8.72723	2.60983e-18	3.74501e-17
Slc6a1	12.6584	-1.40973	0.449421	-3.13676	0.00170824	0.00405946
Copz2	869.174	-1.40884	0.126765	-11.1138	1.07436e-28	4.06104e-27
Cd28	58.6932	-1.40762	0.189849	-7.41443	1.22151e-13	1.06477e-12
Lgals3	2398.15	-1.4069	0.154588	-9.10092	8.9571e-20	1.50478e-18
Pgf	206.23	-1.4047	0.196984	-7.13103	9.96185e-13	7.80959e-12
L3hypdh	142.718	-1.40389	0.187406	-7.49115	6.82752e-14	6.14148e-13
Tafa2	17.7843	-1.40177	0.439942	-3.18627	0.00144119	0.00347382
Actg2	202.892	-1.40159	0.324538	-4.31872	1.5694e-05	5.10677e-05
Kcnab3	24.0255	-1.40045	0.187327	-7.47596	7.66408e-14	6.84012e-13
Col13a1	1423	-1.39917	0.161566	-8.66006	4.71514e-18	6.59126e-17
Fndc7	13.6539	-1.39906	0.290566	-4.81493	1.47249e-06	5.51027e-06
Mmp11	146.67	-1.39883	0.135285	-10.3399	4.64918e-25	1.24481e-23
Fbn2	2332.85	-1.39825	0.23462	-5.95964	2.52787e-09	1.3498e-08
Sec24d	2889.32	-1.39567	0.119299	-11.6989	1.29114e-31	6.87818e-30
Fabp5	41.3964	-1.39547	0.232658	-5.99797	1.99794e-09	1.08058e-08
Tmem144	39.0036	-1.39524	0.181526	-7.68614	1.51639e-14	1.48838e-13
Slc2a13	455.908	-1.39509	0.18215	-7.65899	1.87402e-14	1.81344e-13
Gm9512	14.814	-1.39408	0.299591	-4.65328	3.26703e-06	1.16814e-05
Gm15663	50.1923	-1.39175	0.1825	-7.62602	2.42109e-14	2.30913e-13
Rasl11a	76.4467	-1.38857	0.22748	-6.10414	1.03354e-09	5.77678e-09
Mmp14	8617.69	-1.38759	0.138978	-9.98424	1.78665e-23	4.17963e-22
Ugdh	1500.33	-1.38571	0.11286	-12.2781	1.18687e-34	8.21735e-33
Miat	231.831	-1.38519	0.198922	-6.96347	3.3199e-12	2.45742e-11
Tmem59	1334.9	-1.3828	0.102446	-13.4978	1.61075e-41	2.26862e-39
Tbrg1	1496.51	-1.3828	0.0987673	-14.0006	1.54567e-44	2.88943e-42
Gprc5c	1785.49	-1.38266	0.129861	-10.6472	1.79679e-26	5.53932e-25
Myo1b	2451.59	-1.38238	0.11115	-12.4371	1.64385e-35	1.22031e-33
Cdo1	315.264	-1.38211	0.248029	-5.57239	2.51263e-08	1.18912e-07
Sec61b	550.453	-1.37997	0.160673	-8.58866	8.79917e-18	1.20065e-16
Lat2	277.868	-1.37943	0.133881	-10.3034	6.80242e-25	1.79792e-23
Myof	2478.98	-1.37819	0.0924195	-14.9124	2.73851e-50	9.23146e-48
Chn1	368.694	-1.37676	0.237619	-5.794	6.87289e-09	3.46986e-08
Otog	13.2441	-1.37638	0.416607	-3.3038	0.00095385	0.002374
Snhg18	385.238	-1.37282	0.131663	-10.4268	1.87135e-25	5.26853e-24
Wdr91	584.887	-1.37162	0.115145	-11.9121	1.02329e-32	5.91067e-31
Itih5l-ps	52.9585	-1.37005	0.398974	-3.43393	0.000594892	0.0015424
Gdf5	87.3401	-1.37001	0.379407	-3.61093	0.000305098	0.00082734
Calcr	52.9657	-1.36941	0.410577	-3.33532	0.000852008	0.00214153
Pxdc1	735.435	-1.36898	0.119189	-11.4858	1.55448e-30	7.28127e-29
Upp1	152.076	-1.3679	0.148868	-9.18864	3.9783e-20	6.95628e-19
Gm14230	16.699	-1.36769	0.223706	-6.11378	9.72968e-10	5.45897e-09
Srm	826.151	-1.36758	0.135175	-10.1171	4.64008e-24	1.13995e-22
Naglu	582.209	-1.36706	0.0980026	-13.9492	3.1815e-44	5.89381e-42
Slc25a13	216.694	-1.36689	0.133532	-10.2364	1.36174e-24	3.52958e-23
Sec61a1	5846.58	-1.36671	0.104008	-13.1405	1.93051e-39	2.2054e-37
Clec14a	411.384	-1.36655	0.178416	-7.65938	1.86839e-14	1.81054e-13
Ccdc122	59.4618	-1.36226	0.150345	-9.06088	1.29402e-19	2.12024e-18
4833422C13Rik	85.8511	-1.36173	0.187832	-7.24974	4.17567e-13	3.42635e-12
Col1a2	389859	-1.3602	0.209162	-6.50309	7.86847e-11	4.98304e-10
Aqp5	16.8135	-1.35978	0.385033	-3.53159	0.000413067	0.00109698
Mpv17l	78.8467	-1.35912	0.155303	-8.75138	2.10768e-18	3.05428e-17
Cd5	29.9421	-1.35897	0.244707	-5.55347	2.80051e-08	1.31688e-07
Gm19845	32.3995	-1.35854	0.250703	-5.41894	5.9954e-08	2.7018e-07
Pcdhb22	139.051	-1.35704	0.134887	-10.0606	8.2533e-24	2.00369e-22
Car13	148.608	-1.35567	0.115226	-11.7653	5.88911e-32	3.25532e-30
Mcam	1528.17	-1.35293	0.145156	-9.32054	1.15753e-20	2.12711e-19
Gmppb	587.867	-1.3519	0.122856	-11.0039	3.65822e-28	1.3151e-26
Gpc6	504.621	-1.35127	0.151053	-8.94565	3.69754e-19	5.79959e-18
Atox1	613.888	-1.35032	0.141089	-9.57063	1.06253e-21	2.11713e-20
Hif1a	4543.26	-1.34984	0.102951	-13.1116	2.82678e-39	3.20708e-37
Yipf5	716.172	-1.3489	0.0983765	-13.7116	8.65596e-43	1.37979e-40
Penk	204.451	-1.34798	0.236296	-5.70464	1.16589e-08	5.74233e-08
Atp6v0c-ps2	28.8169	-1.34683	0.175738	-7.66386	1.80426e-14	1.75335e-13
Dynlt1a	29.7749	-1.34504	0.435127	-3.09114	0.00199389	0.00468148
Cryzl2	171.748	-1.34502	0.120575	-11.155	6.76841e-29	2.61124e-27
Niban2	2952.84	-1.34452	0.102115	-13.1667	1.36405e-39	1.57578e-37
Socs1	203.003	-1.3441	0.121394	-11.0722	1.71189e-28	6.35406e-27
Unc5b	2278.68	-1.34393	0.188962	-7.11217	1.14232e-12	8.91781e-12
Chst1	177.262	-1.34379	0.164226	-8.18257	2.77862e-16	3.26495e-15
Tmem35b	84.3106	-1.34351	0.129836	-10.3478	4.28317e-25	1.15736e-23
Kcnk1	427.624	-1.34329	0.268021	-5.01187	5.39033e-07	2.13938e-06
Nupr1	532.018	-1.34306	0.231227	-5.80839	6.30748e-09	3.19696e-08
Myl4	521.776	-1.34137	0.294467	-4.55525	5.23243e-06	1.8224e-05
B4galt2	546.587	-1.34093	0.114997	-11.6606	2.02524e-31	1.05698e-29
Sgpl1	1894.48	-1.34063	0.0978415	-13.702	9.87618e-43	1.56218e-40
Xylb	43.9075	-1.34022	0.186862	-7.17223	7.37877e-13	5.89241e-12
Gem	273.11	-1.3399	0.171849	-7.79695	6.34202e-15	6.50429e-14
4930533B01Rik	10.1463	-1.33971	0.293064	-4.57138	4.84523e-06	1.69385e-05
Ppp1r3b	559.334	-1.33942	0.16977	-7.88963	3.03085e-15	3.22251e-14
Tmeff1	150.845	-1.33877	0.16769	-7.98361	1.42119e-15	1.55861e-14
Kbtbd11	634.885	-1.33557	0.158948	-8.40253	4.36964e-17	5.54647e-16
C3ar1	774.597	-1.33513	0.208983	-6.3887	1.67299e-10	1.02234e-09
Pcsk6	2990.4	-1.33503	0.166372	-8.02439	1.02033e-15	1.13534e-14
Scube3	108.188	-1.33304	0.23348	-5.70944	1.13351e-08	5.5976e-08
Emb	1383.17	-1.33259	0.115158	-11.5718	5.72471e-31	2.8503e-29
Npas3	23.9791	-1.33218	0.263138	-5.06267	4.13435e-07	1.66826e-06
Fam171a2	279.871	-1.3321	0.133305	-9.99287	1.6377e-23	3.85751e-22
P2ry10b	169.411	-1.33154	0.166354	-8.00429	1.20156e-15	1.32766e-14
Sardh	491.453	-1.33088	0.135616	-9.81365	9.83408e-23	2.15355e-21
Robo2	400.496	-1.33006	0.200029	-6.64934	2.9441e-11	1.95667e-10
Mfap2	361.71	-1.33004	0.193932	-6.85828	6.9694e-12	4.97956e-11
Klhdc8a	20.6269	-1.32952	0.294632	-4.51248	6.40753e-06	2.20037e-05
Lacc1	176.168	-1.3292	0.13251	-10.0309	1.11446e-23	2.67094e-22
Adgrg2	113.711	-1.32918	0.17029	-7.80535	5.93384e-15	6.11311e-14
Plxnd1	3954.49	-1.32809	0.138839	-9.56569	1.1146e-21	2.21873e-20
Tspan4	1175.7	-1.32498	0.128664	-10.298	7.19117e-25	1.89714e-23
Tmtc4	238.93	-1.32428	0.142448	-9.29659	1.45017e-20	2.65065e-19
Prr7	178.104	-1.32398	0.111722	-11.8506	2.13713e-32	1.2073e-30
Baalc	37.4096	-1.32137	0.250294	-5.27927	1.29697e-07	5.60992e-07
Serp1	3252.54	-1.32105	0.109503	-12.064	1.6363e-33	1.01653e-31
Col4a5	143.554	-1.31974	0.254072	-5.19434	2.05448e-07	8.64814e-07
Map4k4	5674.73	-1.31927	0.0927209	-14.2284	6.10359e-46	1.24265e-43
Scd2	3649.49	-1.31881	0.196204	-6.72161	1.79722e-11	1.22088e-10
Aldh18a1	1298.57	-1.3184	0.126619	-10.4123	2.17787e-25	6.06823e-24
Fam114a1	1843.61	-1.31743	0.113252	-11.6327	2.81148e-31	1.45258e-29
Ptx3	798.024	-1.31688	0.223134	-5.90176	3.5964e-09	1.87793e-08
Wnk4	145.624	-1.31651	0.270041	-4.87521	1.08692e-06	4.13971e-06
Matk	203.325	-1.31486	0.171206	-7.68001	1.59077e-14	1.55693e-13
Cdh11	4938.77	-1.31393	0.157835	-8.32472	8.45275e-17	1.04205e-15
Nrp2	8934.34	-1.31306	0.136474	-9.62133	6.49837e-22	1.31392e-20
Xlr	11.8516	-1.31256	0.291459	-4.50342	6.68698e-06	2.28983e-05
Tcaf1	614.602	-1.31114	0.133683	-9.80785	1.04168e-22	2.27631e-21
Fhl2	493.164	-1.30986	0.138712	-9.44299	3.62307e-21	6.91106e-20
Plcd1	996.823	-1.30907	0.128003	-10.2269	1.50296e-24	3.88748e-23
Xpr1	2609.82	-1.30896	0.0861214	-15.199	3.59064e-52	1.3673e-49
Fosl2	3891.97	-1.30767	0.0999658	-13.0812	4.21944e-39	4.68996e-37
Nudcd1	399.364	-1.30611	0.111458	-11.7184	1.02532e-31	5.56299e-30
Ell2	1791.98	-1.30536	0.107789	-12.1103	9.31607e-34	5.9678e-32
Fibin	1205.62	-1.30509	0.201658	-6.47179	9.68504e-11	6.05698e-10
Col5a2	53482.4	-1.30342	0.177615	-7.33845	2.16078e-13	1.83604e-12
Havcr2	211.738	-1.30319	0.220118	-5.92041	3.21138e-09	1.68846e-08
Calu	10022.1	-1.30217	0.114588	-11.3639	6.32228e-30	2.73695e-28
Gm13446	38.3358	-1.30129	0.210444	-6.18356	6.26704e-10	3.57771e-09
Gm4788	34.8181	-1.30013	0.22167	-5.86514	4.48745e-09	2.3179e-08
Gm7334	20.687	-1.29867	0.219507	-5.9163	3.2927e-09	1.72768e-08
P4hb	8716.2	-1.29848	0.0966348	-13.437	3.66915e-41	5.09789e-39
Hsd3b7	831.025	-1.29707	0.0716884	-18.0932	3.60464e-73	5.70172e-70
Dap	1571.67	-1.29663	0.132461	-9.78879	1.25787e-22	2.74e-21
Frk	247.597	-1.29317	0.134588	-9.60835	7.37173e-22	1.48467e-20
Nectin3	369.848	-1.29303	0.135601	-9.53551	1.49154e-21	2.94061e-20
Stk39	482.56	-1.29141	0.130299	-9.91107	3.72642e-23	8.47637e-22
Pik3r3	361.241	-1.28967	0.154175	-8.36495	6.01425e-17	7.52714e-16
Pdia4	3206.68	-1.28799	0.108539	-11.8666	1.76519e-32	1.0027e-30
Acot12	16.8809	-1.28795	0.306608	-4.20065	2.66147e-05	8.40415e-05
Camk2n2	40.3638	-1.28743	0.231977	-5.54983	2.85947e-08	1.34245e-07
Fstl1	9941.46	-1.28555	0.156063	-8.23738	1.76022e-16	2.11176e-15
Atp6v1e1	1449.35	-1.28544	0.0833139	-15.4289	1.04671e-53	4.48407e-51
Ccdc68	40.2384	-1.28492	0.165859	-7.74704	9.40627e-15	9.43518e-14
Adgra3	1292.54	-1.28469	0.105091	-12.2245	2.29908e-34	1.55003e-32
Akr1c12	12.916	-1.28402	0.299326	-4.28969	1.7892e-05	5.773e-05
Ccl3	93.0628	-1.2835	0.278337	-4.6113	4.0015e-06	1.41258e-05
Ift20	466.536	-1.28272	0.12099	-10.6018	2.92312e-26	8.8135e-25
Ptk7	1417.22	-1.28185	0.112477	-11.3966	4.34881e-30	1.92311e-28
P4ha2	1606.56	-1.28175	0.158977	-8.06247	7.47672e-16	8.40589e-15
Pdgfc	482.385	-1.28169	0.0929821	-13.7843	3.16752e-43	5.12864e-41
Macroh2a2	222.995	-1.28148	0.132681	-9.65836	4.53077e-22	9.36344e-21
Src	1158.63	-1.28142	0.123146	-10.4058	2.33375e-25	6.48499e-24
Myo19	368.764	-1.28064	0.123776	-10.3464	4.34527e-25	1.17259e-23
Mtus2	25.4887	-1.2805	0.246243	-5.20016	1.99121e-07	8.39213e-07
Col1a1	510292	-1.28049	0.244872	-5.22922	1.70226e-07	7.25013e-07
Spred1	1239.97	-1.27846	0.088393	-14.4633	2.06595e-47	4.9979e-45
Ckap4	4776.87	-1.27711	0.124739	-10.2383	1.33557e-24	3.47197e-23
Lrrc59	3521.72	-1.27566	0.0997033	-12.7946	1.75841e-37	1.63612e-35
Tnfrsf23	322.966	-1.27511	0.125867	-10.1306	4.04094e-24	9.98725e-23
Atp8b2	2885.04	-1.27392	0.0967323	-13.1695	1.31462e-39	1.53594e-37
Csrnp3	214.695	-1.27381	0.26841	-4.74578	2.07704e-06	7.61322e-06
Morf4l2	2517.76	-1.27342	0.0963209	-13.2206	6.67217e-40	8.16666e-38
Ctnnb1	13152.6	-1.27215	0.0838179	-15.1775	4.98062e-52	1.86212e-49
Alx4	219.139	-1.27195	0.143046	-8.89191	6.00679e-19	9.1903e-18
Rab34	484.131	-1.2719	0.113383	-11.2178	3.33629e-29	1.33471e-27
Lyplal1	59.0612	-1.27156	0.169567	-7.49889	6.43618e-14	5.81129e-13
Gdpd5	198.696	-1.27109	0.0973598	-13.0555	5.90919e-39	6.42914e-37
Cmtm3	819.791	-1.27071	0.111047	-11.443	2.5494e-30	1.16238e-28
Scn3a	68.3782	-1.26843	0.199617	-6.35432	2.09344e-10	1.26313e-09
Foxs1	124.58	-1.2666	0.201896	-6.27353	3.52961e-10	2.08143e-09
Cpne8	250.239	-1.26659	0.167935	-7.54217	4.62198e-14	4.25052e-13
Dynll1	852.347	-1.26321	0.139333	-9.06617	1.23277e-19	2.02795e-18
Col27a1	2918.79	-1.26254	0.212198	-5.94983	2.6842e-09	1.42623e-08
Klra17	26.716	-1.26223	0.230801	-5.4689	4.52827e-08	2.07106e-07
Frmd5	27.5143	-1.2621	0.205171	-6.15145	7.67769e-10	4.34442e-09
Ctsh	1329.74	-1.26181	0.112839	-11.1824	4.97137e-29	1.96212e-27
Mfge8	3201.54	-1.26175	0.142579	-8.84948	8.79301e-19	1.31594e-17
Pcdh12	345.168	-1.2616	0.160771	-7.84721	4.25407e-15	4.44946e-14
Peg3	3802.03	-1.26155	0.156106	-8.08135	6.4054e-16	7.25298e-15
Gm10629	58.5513	-1.26106	0.295817	-4.26296	2.01735e-05	6.45647e-05
Chadl	131.881	-1.26064	0.374158	-3.36928	0.000753647	0.00191159
Cnpy2	851.105	-1.26061	0.11456	-11.0039	3.65822e-28	1.3151e-26
Zfp618	123.815	-1.25939	0.123745	-10.1774	2.50262e-24	6.30655e-23
Lman1	3719.27	-1.25863	0.089213	-14.1082	3.38328e-45	6.56324e-43
Ccnd1	1319.03	-1.2581	0.14759	-8.5243	1.53735e-17	2.04216e-16
Snai1	369.809	-1.25797	0.162123	-7.75937	8.53497e-15	8.61583e-14
Tmem178	32.3088	-1.25735	0.252927	-4.97122	6.65335e-07	2.60646e-06
Col14a1	2696.53	-1.25717	0.192488	-6.53115	6.52683e-11	4.18364e-10
Sox4	1313.19	-1.25631	0.185715	-6.76471	1.33581e-11	9.22373e-11
Grn	3249.82	-1.25524	0.130672	-9.60599	7.54275e-22	1.51614e-20
Scara3	1733.05	-1.2552	0.145276	-8.64013	5.61497e-18	7.78561e-17
Copb1	2103.84	-1.25483	0.0970166	-12.9341	2.88866e-38	2.92608e-36
Crabp2	87.6054	-1.25439	0.312732	-4.01107	6.0443e-05	0.000182483
Mdfic	990.806	-1.25401	0.0844181	-14.8548	6.47567e-50	1.95822e-47
Slc31a1	898.967	-1.25174	0.098699	-12.6824	7.40533e-37	6.34482e-35
Tmsb10	720.714	-1.25136	0.187601	-6.67034	2.55207e-11	1.70883e-10
Mgat3	127.522	-1.25096	0.158446	-7.89522	2.89807e-15	3.08612e-14
Tbc1d8b	638.098	-1.25061	0.125452	-9.96884	2.0866e-23	4.85921e-22
Mmp23	799.566	-1.25001	0.160838	-7.77185	7.735e-15	7.84681e-14
Matn2	828.775	-1.24931	0.200137	-6.24229	4.31218e-10	2.51051e-09
Gpr183	202.877	-1.24885	0.140372	-8.89668	5.75396e-19	8.82317e-18
Me2	1000.57	-1.24711	0.147072	-8.47962	2.25939e-17	2.94796e-16
Loxl3	1935.22	-1.24659	0.136311	-9.14519	5.95247e-20	1.02342e-18
Tmed3	1750.67	-1.24623	0.128154	-9.72449	2.37097e-22	5.05226e-21
Pkp2	93.8041	-1.24589	0.153335	-8.12528	4.4634e-16	5.14756e-15
Gm10808	126.893	-1.24543	0.160093	-7.77942	7.28554e-15	7.41647e-14
Cox6a1	1716.13	-1.24452	0.144667	-8.60263	7.7908e-18	1.06873e-16
Gm17455	11.4276	-1.24446	0.329681	-3.77476	0.000160165	0.000455654
Chrna7	45.7459	-1.24311	0.20879	-5.95388	2.6186e-09	1.3939e-08
Cd1d1	197.252	-1.24301	0.159414	-7.79735	6.32184e-15	6.49006e-14
Rab13	239.122	-1.24292	0.107731	-11.5372	8.56382e-31	4.14348e-29
Itm2c	3554.51	-1.24259	0.099325	-12.5103	6.55423e-36	5.01021e-34
BC043934	22.2576	-1.24257	0.179384	-6.92686	4.30269e-12	3.15199e-11
Txndc5	4717.36	-1.24006	0.0898862	-13.7959	2.69775e-43	4.4379e-41
Stk32b	29.5369	-1.23951	0.390411	-3.17488	0.00149896	0.00359944
Gns	2991.84	-1.2376	0.105827	-11.6946	1.35896e-31	7.20424e-30
Tuba1a	69.4249	-1.23725	0.191501	-6.46077	1.04172e-10	6.49316e-10
Mageh1	150.393	-1.23611	0.162348	-7.614	2.65743e-14	2.52284e-13
Poglut2	358.683	-1.23442	0.121785	-10.1361	3.82175e-24	9.47969e-23
Galk2	290.076	-1.23361	0.088726	-13.9036	6.02709e-44	1.09677e-41
Ost4	554.805	-1.2335	0.144372	-8.54394	1.29725e-17	1.74349e-16
Sinhcaf	31.6873	-1.23307	0.172888	-7.13215	9.88117e-13	7.76113e-12
Sh3bgrl	1889.16	-1.23299	0.102588	-12.0189	2.82734e-33	1.715e-31
Prkch	701.349	-1.22923	0.083121	-14.7884	1.73927e-49	5.03727e-47
Map4k3	1139.38	-1.22809	0.0963749	-12.7428	3.41761e-37	3.05549e-35
8030451A03Rik	27.9059	-1.22777	0.254256	-4.82886	1.37319e-06	5.15273e-06
Glt8d1	559.007	-1.22763	0.0861563	-14.2489	4.55646e-46	9.36944e-44
Epb41l3	703.524	-1.2276	0.131848	-9.31073	1.26961e-20	2.32682e-19
Metrnl	1203.18	-1.22651	0.130324	-9.41124	4.90325e-21	9.25855e-20
Nradd	129.968	-1.22646	0.149039	-8.2291	1.88618e-16	2.2576e-15
Zc3hav1l	299.754	-1.22574	0.12362	-9.91539	3.56872e-23	8.13565e-22
Rhoc	1729.88	-1.22537	0.105807	-11.5812	5.13485e-31	2.57532e-29
Hmgcll1	91.0759	-1.22429	0.204343	-5.99134	2.08123e-09	1.12385e-08
Lasp1	3230.83	-1.22046	0.115425	-10.5736	3.9495e-26	1.17872e-24
Eif1a	911.149	-1.21994	0.0989625	-12.3273	6.45515e-35	4.54579e-33
BC039771	18.5319	-1.21887	0.217989	-5.59145	2.25183e-08	1.07062e-07
Med10	289.687	-1.21853	0.104422	-11.6693	1.82998e-31	9.59946e-30
Foxc1	745.496	-1.21817	0.161664	-7.53523	4.87479e-14	4.46903e-13
Stt3a	3537.61	-1.21785	0.10555	-11.5381	8.47347e-31	4.10943e-29
Zfp947	23.7088	-1.21681	0.208158	-5.84562	5.0467e-09	2.59115e-08
Wnk3	111.538	-1.21552	0.136862	-8.88141	6.60205e-19	1.00283e-17
Ramp3	52.5781	-1.2147	0.20695	-5.8695	4.37113e-09	2.26008e-08
Copb2	4048.77	-1.21422	0.0821047	-14.7886	1.73437e-49	5.03727e-47
Slc41a2	720.65	-1.2138	0.127674	-9.50707	1.96113e-21	3.82606e-20
Bfsp1	85.1038	-1.21338	0.136675	-8.87786	6.81584e-19	1.03282e-17
Mtap	469.702	-1.21243	0.109837	-11.0385	2.49296e-28	9.17043e-27
Arpin	343.19	-1.21213	0.13357	-9.07482	1.13864e-19	1.88518e-18
Atp6v1d	898.326	-1.21196	0.064955	-18.6585	1.07703e-77	2.2147e-74
Zfp9	564.741	-1.21182	0.108942	-11.1236	9.63262e-29	3.66538e-27
Serinc5	3225.77	-1.21112	0.163783	-7.39468	1.41745e-13	1.22673e-12
Dpp7	281.308	-1.21103	0.0829357	-14.602	2.72535e-48	7.09384e-46
Dcaf12l1	32.2189	-1.21083	0.232444	-5.20913	1.89733e-07	8.02291e-07
Coro1c	2068.73	-1.21023	0.105004	-11.5256	9.80151e-31	4.6763e-29
Pard6g	525.73	-1.20951	0.123967	-9.75665	1.72762e-22	3.7091e-21
Cfh	4706.74	-1.20925	0.213557	-5.66244	1.49239e-08	7.27033e-08
Gm6314	10.284	-1.20874	0.354267	-3.41195	0.00064499	0.00165973
Npl	88.9879	-1.20826	0.175175	-6.89746	5.29396e-12	3.83309e-11
Igf1	3692.68	-1.20803	0.181727	-6.64752	2.98076e-11	1.97848e-10
Tspyl5	43.948	-1.20773	0.184885	-6.53233	6.47558e-11	4.15597e-10
Itpripl2	3912.53	-1.20664	0.0900983	-13.3924	6.69393e-41	8.88046e-39
Satb2	2032.29	-1.20619	0.253584	-4.7566	1.96885e-06	7.23343e-06
Ssr4	1067.73	-1.20567	0.121546	-9.91946	3.42615e-23	7.8193e-22
Dzip1l	347.774	-1.20511	0.104358	-11.5479	7.56547e-31	3.68646e-29
Steap2	309.963	-1.20485	0.120024	-10.0384	1.03337e-23	2.48237e-22
Bdkrb2	34.3124	-1.20482	0.245365	-4.91033	9.09236e-07	3.50518e-06
Ptchd1	49.5781	-1.20397	0.193897	-6.20932	5.3215e-10	3.06087e-09
Mpzl3	41.506	-1.20372	0.186404	-6.45762	1.06363e-10	6.62169e-10
Angptl1	470.193	-1.20365	0.256691	-4.68908	2.74432e-06	9.89851e-06
Phospho1	294.328	-1.20183	0.177538	-6.76943	1.2929e-11	8.95151e-11
Eef1a1	12310.5	-1.20182	0.0960644	-12.5106	6.53215e-36	5.01021e-34
Hmgn3	210.351	-1.20116	0.128087	-9.37768	6.74398e-21	1.25955e-19
Grk3	860.292	-1.20082	0.152555	-7.87143	3.50607e-15	3.6991e-14
Selenom	695.769	-1.19885	0.148243	-8.08709	6.11091e-16	6.9348e-15
Erp29	1840.86	-1.19859	0.0940737	-12.741	3.49918e-37	3.11488e-35
Nme1	388.707	-1.19813	0.124415	-9.63016	5.96391e-22	1.21182e-20
Gja1	7073.33	-1.19649	0.167961	-7.12364	1.05116e-12	8.22486e-12
Gmds	198.651	-1.19596	0.104292	-11.4673	1.92482e-30	8.91441e-29
Cpe	3662.92	-1.19531	0.132882	-8.99529	2.35599e-19	3.76427e-18
Arhgef26	98.4853	-1.19507	0.13803	-8.65806	4.79877e-18	6.69451e-17
Fat1	11993.1	-1.19479	0.137266	-8.7042	3.19828e-18	4.54501e-17
Frrs1	341.048	-1.19451	0.137898	-8.66228	4.62425e-18	6.48625e-17
Vim	12581.1	-1.19381	0.11239	-10.6221	2.35311e-26	7.18974e-25
Mmgt2	197.371	-1.19304	0.13877	-8.59723	8.16649e-18	1.11654e-16
Chst13	139.662	-1.19286	0.196092	-6.08318	1.17821e-09	6.55407e-09
Tuba1c	182.957	-1.19213	0.160607	-7.42268	1.14775e-13	1.0026e-12
Kcna6	228.846	-1.19126	0.340342	-3.50019	0.000464925	0.00122457
Asphd2	47.3941	-1.19059	0.179991	-6.61471	3.72283e-11	2.44734e-10
Mir1907	16.8647	-1.19015	0.262616	-4.5319	5.84558e-06	2.01818e-05
Angpt2	443.304	-1.19011	0.0988425	-12.0405	2.17681e-33	1.33617e-31
Nnmt	141.892	-1.18998	0.169599	-7.0164	2.27659e-12	1.71729e-11
Elfn1	21.6427	-1.18975	0.441865	-2.69257	0.00709034	0.0150107
B4galnt3	159.625	-1.18956	0.194164	-6.12656	8.97994e-10	5.05349e-09
Itgax	261.422	-1.1891	0.161416	-7.36667	1.74939e-13	1.50074e-12
Pdk3	422.794	-1.189	0.139698	-8.51122	1.72114e-17	2.276e-16
Vash1	1174.44	-1.18805	0.144167	-8.24084	1.71006e-16	2.05517e-15
Plagl1	1073.44	-1.1861	0.142448	-8.32653	8.32482e-17	1.02813e-15
Twist1	359.599	-1.18597	0.149032	-7.95786	1.75044e-15	1.9085e-14
Krtcap2	698.343	-1.18526	0.147962	-8.01059	1.14159e-15	1.26547e-14
Cacnb3	521.795	-1.18473	0.159074	-7.44767	9.50003e-14	8.37689e-13
Ykt6	1968.16	-1.18467	0.0715111	-16.5662	1.22319e-61	8.66809e-59
Sdk2	871.663	-1.18446	0.199775	-5.92897	3.04848e-09	1.60692e-08
B3gnt7	39.2149	-1.18309	0.246872	-4.79232	1.6486e-06	6.12137e-06
Mmp17	69.2422	-1.18276	0.191389	-6.17987	6.41549e-10	3.65748e-09
1700003F12Rik	13.4252	-1.18078	0.262817	-4.4928	7.02916e-06	2.39941e-05
Gsap	519.568	-1.17927	0.126356	-9.33291	1.03004e-20	1.90131e-19
Edil3	1170.02	-1.1791	0.179212	-6.57936	4.7247e-11	3.07158e-10
Foxc2	107.319	-1.17819	0.21865	-5.38848	7.10568e-08	3.18054e-07
Slc30a4	1148.17	-1.17787	0.113477	-10.3798	3.06282e-25	8.37509e-24
Gm20036	17.3231	-1.17736	0.261642	-4.4999	6.79858e-06	2.32495e-05
Megf6	685.308	-1.17678	0.204995	-5.74053	9.43799e-09	4.6951e-08
Cdk4	1616.44	-1.17661	0.0988987	-11.8971	1.22523e-32	7.01794e-31
Ecrg4	692.359	-1.17648	0.341499	-3.44505	0.00057096	0.00148447
Car8	216.799	-1.17601	0.218909	-5.37214	7.78068e-08	3.46383e-07
Myo1d	2240.6	-1.17488	0.12521	-9.38334	6.39169e-21	1.19484e-19
Marcks	2559.12	-1.17445	0.128184	-9.16221	5.08439e-20	8.7563e-19
Gm20276	12.0862	-1.17445	0.266271	-4.41072	1.03027e-05	3.42918e-05
Galk1	610.445	-1.17436	0.123422	-9.51503	1.81663e-21	3.55426e-20
Nexmif	11.3163	-1.17434	0.295747	-3.97075	7.16478e-05	0.000213922
Nipsnap3b	245.475	-1.17413	0.128942	-9.10588	8.55706e-20	1.4411e-18
Plpp2	152.412	-1.17398	0.132475	-8.86185	7.86956e-19	1.18464e-17
Snx8	689.684	-1.1733	0.0773929	-15.1603	6.47857e-52	2.37891e-49
Anxa5	2893.61	-1.17278	0.10653	-11.0089	3.46171e-28	1.24883e-26
Slc17a9	207.633	-1.17047	0.174411	-6.71098	1.93327e-11	1.31027e-10
Selenof	2678.58	-1.17014	0.101948	-11.4779	1.70425e-30	7.94659e-29
Zfp105	76.0831	-1.1689	0.133865	-8.73189	2.50445e-18	3.60384e-17
Igfbp4	7413.43	-1.16868	0.173444	-6.73808	1.60493e-11	1.09569e-10
Wif1	1182.43	-1.16715	0.239238	-4.87864	1.06822e-06	4.07455e-06
Nans	479.955	-1.16673	0.109211	-10.6832	1.21933e-26	3.83382e-25
Psat1	528.834	-1.16657	0.145966	-7.99209	1.32669e-15	1.45964e-14
Rspo3	138.517	-1.1658	0.182737	-6.37964	1.77504e-10	1.08052e-09
Sec22b	1101.17	-1.1642	0.0945992	-12.3067	8.33676e-35	5.79151e-33
Svbp	276.192	-1.16403	0.115045	-10.118	4.59523e-24	1.13164e-22
Golt1b	1221.1	-1.16387	0.100266	-11.6079	3.7579e-31	1.92702e-29
Cd200	1423.58	-1.1637	0.157222	-7.40163	1.34526e-13	1.16819e-12
Rcan3	451.528	-1.163	0.0911807	-12.7549	2.92865e-37	2.62978e-35
B3gnt9	892.982	-1.16269	0.116524	-9.9781	1.90075e-23	4.43142e-22
Twf1	943.503	-1.16235	0.0920031	-12.6339	1.37382e-36	1.12102e-34
Pofut2	2128.51	-1.16225	0.0946765	-12.276	1.21848e-34	8.40792e-33
Fam81a	58.7389	-1.16151	0.225404	-5.15302	2.56323e-07	1.06523e-06
Alg5	391.844	-1.15927	0.0928294	-12.4882	8.65813e-36	6.56964e-34
Zfp365	89.5431	-1.15909	0.189564	-6.1145	9.68618e-10	5.43605e-09
Ccl7	153.91	-1.15889	0.317507	-3.64996	0.000262281	0.000719104
Bcl6b	293.348	-1.15858	0.185769	-6.2367	4.46895e-10	2.59664e-09
Elovl1	1087.89	-1.15838	0.097825	-11.8414	2.38553e-32	1.34393e-30
Wls	1470.09	-1.15838	0.0876807	-13.2113	7.55196e-40	9.13574e-38
Zfp991	14.59	-1.15701	0.260972	-4.43345	9.2736e-06	3.10778e-05
Slc8a3	1664.57	-1.15608	0.156797	-7.37311	1.66689e-13	1.43116e-12
Slc39a13	1611.21	-1.15597	0.102073	-11.325	9.87168e-30	4.19404e-28
Slc26a2	1152.38	-1.15552	0.142034	-8.13556	4.10031e-16	4.73944e-15
Scpep1	1009.31	-1.15409	0.0906268	-12.7346	3.79877e-37	3.36699e-35
Ppa1	772.285	-1.15383	0.146487	-7.87663	3.36319e-15	3.55565e-14
Ccn3	954.962	-1.15374	0.254031	-4.54171	5.58e-06	1.93363e-05
Gla	247.123	-1.15347	0.142597	-8.08902	6.01464e-16	6.83688e-15
Akip1	162.557	-1.15338	0.0914875	-12.6069	1.93389e-36	1.56561e-34
Pgpep1	562.75	-1.15333	0.0803698	-14.3503	1.06002e-46	2.36927e-44
Bgn	13794.7	-1.15305	0.122194	-9.43626	3.86316e-21	7.32825e-20
Zfp275	1009.87	-1.15211	0.0866461	-13.2967	2.41873e-40	3.07014e-38
Mgp	4205.33	-1.1506	0.241615	-4.76212	1.91571e-06	7.05457e-06
Pls3	1716.16	-1.15007	0.11378	-10.1078	5.0992e-24	1.24679e-22
Cdk18	176.521	-1.14956	0.176174	-6.52512	6.79489e-11	4.33385e-10
Svep1	2060.62	-1.14872	0.131782	-8.71686	2.86011e-18	4.09272e-17
Pcdh20	22.5137	-1.14748	0.29803	-3.85023	0.000118007	0.000341531
Tor2a	458.964	-1.1473	0.0848705	-13.5182	1.2213e-41	1.7562e-39
Rab31	2129.51	-1.14706	0.079327	-14.4598	2.1729e-47	5.19551e-45
Slc36a4	331.203	-1.14695	0.105036	-10.9196	9.28671e-28	3.17214e-26
C1qtnf6	997.456	-1.14679	0.201769	-5.68367	1.31831e-08	6.45439e-08
Atp6v0a4	39.5658	-1.14652	0.281703	-4.06998	4.70174e-05	0.000143915
BC028528	22.882	-1.14597	0.207025	-5.53544	3.10448e-08	1.44986e-07
Gm6377	39.1344	-1.14574	0.270948	-4.22862	2.35133e-05	7.4684e-05
2610524H06Rik	53.587	-1.14478	0.180805	-6.33155	2.42717e-10	1.45722e-09
Pcbd1	12.901	-1.14476	0.359482	-3.18448	0.00145014	0.00349252
Rnf149	1068.8	-1.1446	0.11415	-10.0272	1.15786e-23	2.76208e-22
Pxdn	2601.02	-1.14407	0.191979	-5.95936	2.53222e-09	1.35142e-08
Crispld1	328.853	-1.1438	0.414968	-2.75634	0.00584516	0.0125792
Casp6	173.16	-1.14376	0.14469	-7.90491	2.68133e-15	2.87018e-14
Lars2	2299.57	-1.14355	0.343191	-3.3321	0.000861947	0.00216519
C9orf72	365.32	-1.14301	0.0963024	-11.869	1.71577e-32	9.77326e-31
Il13ra1	811.889	-1.14274	0.126238	-9.05229	1.39995e-19	2.28289e-18
B3galnt1	165.25	-1.1418	0.149019	-7.66216	1.82834e-14	1.77508e-13
Tmem121	48.9836	-1.14129	0.179057	-6.3739	1.84278e-10	1.11845e-09
Pappa	932.842	-1.14064	0.25932	-4.39858	1.08962e-05	3.61559e-05
Lrrc75b	131.622	-1.13905	0.208002	-5.47614	4.34703e-08	1.99438e-07
Ccl8	73.8937	-1.13837	0.33495	-3.39862	0.000677275	0.00173543
Bambi	1328.92	-1.13772	0.193255	-5.88712	3.92989e-09	2.04273e-08
Atp6v1f	562.366	-1.13764	0.108475	-10.4876	9.85437e-26	2.85001e-24
Fgd1	238.238	-1.1362	0.133713	-8.49735	1.93972e-17	2.54703e-16
Mex3b	237.796	-1.13618	0.192376	-5.90603	3.50443e-09	1.83223e-08
Efnb1	922.925	-1.13613	0.163043	-6.96824	3.20927e-12	2.38153e-11
Zfp354c	653.62	-1.13558	0.13769	-8.2474	1.61876e-16	1.94887e-15
Poglut3	639.495	-1.13515	0.105764	-10.7329	7.1332e-27	2.2883e-25
Ms4a6d	355.213	-1.1341	0.252453	-4.49231	7.04541e-06	2.40456e-05
Pstpip1	883.099	-1.13406	0.138126	-8.21038	2.20488e-16	2.62226e-15
Pdia3	4817.52	-1.13387	0.101527	-11.1682	5.83376e-29	2.27628e-27
Bcar1	759.212	-1.13386	0.100017	-11.3366	8.64534e-30	3.68826e-28
Cd40	64.2444	-1.13352	0.1362	-8.32247	8.61487e-17	1.0614e-15
Guca1a	29.6525	-1.13325	0.248393	-4.56232	5.05915e-06	1.76474e-05
Enox1	82.1409	-1.13264	0.149417	-7.58041	3.44465e-14	3.21965e-13
Gli3	677.564	-1.13257	0.12616	-8.97723	2.7767e-19	4.40565e-18
Manba	465.007	-1.13239	0.0843805	-13.42	4.61455e-41	6.28404e-39
Xpot	1615.89	-1.13219	0.0729963	-15.5103	2.95454e-54	1.35009e-51
Rps4l	239.79	-1.13001	0.180296	-6.26754	3.66789e-10	2.15864e-09
Fbxo17	166.109	-1.12895	0.120157	-9.39564	5.6871e-21	1.06994e-19
Jpt2	757.886	-1.12882	0.119854	-9.41826	4.5861e-21	8.67562e-20
Dock5	1219.21	-1.12797	0.132908	-8.48683	2.12355e-17	2.77954e-16
Adamts6	309.355	-1.12795	0.154566	-7.29751	2.93132e-13	2.4453e-12
Chst2	765.498	-1.12723	0.141165	-7.98518	1.40315e-15	1.54046e-14
Hs2st1	975.977	-1.12715	0.0887373	-12.7021	5.75721e-37	4.99517e-35
Ddc	30.5987	-1.1266	0.281119	-4.00755	6.13524e-05	0.000185119
Cubn	52.8935	-1.12624	0.164128	-6.86197	6.79187e-12	4.86116e-11
Pgm3	491.605	-1.12605	0.0924452	-12.1808	3.9352e-34	2.59357e-32
Slc35a2	710.717	-1.12595	0.0882583	-12.7574	2.8355e-37	2.56856e-35
Pcdhb5	32.7368	-1.1252	0.207125	-5.43247	5.55784e-08	2.51565e-07
S1pr2	447.646	-1.1247	0.12601	-8.92546	4.43845e-19	6.90899e-18
Gnb4	501.341	-1.12394	0.123411	-9.1073	8.44578e-20	1.42353e-18
Tmem45a	453.777	-1.12345	0.192294	-5.84235	5.14705e-09	2.63871e-08
Zfp820	41.4553	-1.12307	0.162061	-6.92995	4.20999e-12	3.08627e-11
Surf4	6363.11	-1.12292	0.0821746	-13.665	1.64241e-42	2.55856e-40
Dctd	136.729	-1.12284	0.145841	-7.69905	1.37084e-14	1.35364e-13
Dbn1	832.971	-1.12273	0.142148	-7.89829	2.8276e-15	3.01733e-14
Insc	485.457	-1.12256	0.166373	-6.74721	1.50715e-11	1.03443e-10
Junb	3483.25	-1.12121	0.136621	-8.2067	2.27348e-16	2.70073e-15
Rnd3	745.218	-1.12115	0.123778	-9.05775	1.33174e-19	2.17856e-18
Slc39a14	3562.51	-1.1206	0.167566	-6.68749	2.27033e-11	1.53115e-10
Sec13	1149.06	-1.11952	0.105084	-10.6536	1.67834e-26	5.18974e-25
Tcaf2	170.563	-1.11942	0.149196	-7.50298	6.23818e-14	5.64843e-13
Cacna1b	17.6334	-1.11825	0.259264	-4.31319	1.60918e-05	5.2299e-05
Col24a1	2265.74	-1.11818	0.201214	-5.5572	2.74143e-08	1.29146e-07
Cul7	1628.55	-1.11793	0.103997	-10.7497	5.9474e-27	1.9229e-25
Batf3	29.8088	-1.1172	0.335255	-3.33239	0.000861026	0.00216314
Hyal2	445.723	-1.11712	0.0902748	-12.3746	3.58482e-35	2.61399e-33
Slc29a1	2908.35	-1.11707	0.0931643	-11.9904	3.99119e-33	2.38578e-31
Slc35b2	980.544	-1.11675	0.0840379	-13.2887	2.69253e-40	3.37601e-38
Slc39a6	682.648	-1.1167	0.114597	-9.74459	1.94567e-22	4.15461e-21
Nudcd2	378.182	-1.11662	0.123555	-9.03744	1.60379e-19	2.59675e-18
Hdhd3	31.9086	-1.11577	0.215195	-5.18492	2.16111e-07	9.06178e-07
Fnbp1l	672.398	-1.11547	0.0923591	-12.0776	1.38779e-33	8.72695e-32
Plxnb2	3894.94	-1.11524	0.0984322	-11.3301	9.31362e-30	3.96513e-28
Smo	1474.09	-1.11487	0.105407	-10.5768	3.81857e-26	1.1413e-24
Ccl4	48.4924	-1.11475	0.345695	-3.22467	0.00126118	0.00307379
Armh4	351.923	-1.11392	0.179394	-6.20934	5.32091e-10	3.06087e-09
Flvcr2	221.117	-1.11187	0.205878	-5.40062	6.64115e-08	2.97975e-07
Slc38a10	4995.88	-1.11062	0.0835596	-13.2914	2.59752e-40	3.27687e-38
Eif4a1	1840.14	-1.10975	0.0915346	-12.1238	7.90166e-34	5.09347e-32
Gpr180	799.974	-1.10949	0.123512	-8.98289	2.63736e-19	4.1878e-18
1810055G02Rik	649.82	-1.10917	0.110627	-10.0262	1.16942e-23	2.78642e-22
S100a10	1423.43	-1.10881	0.120801	-9.17878	4.35995e-20	7.59133e-19
Morc4	295.735	-1.10869	0.11173	-9.92291	3.30961e-23	7.57014e-22
Tubb2b	116.323	-1.1082	0.236583	-4.68419	2.81063e-06	1.0127e-05
Kidins220	3961.87	-1.10783	0.0516737	-21.4389	5.80254e-102	1.19318e-97
Dse	1259.65	-1.10777	0.112022	-9.88885	4.65365e-23	1.04697e-21
Cttnbp2nl	759.12	-1.10696	0.100405	-11.0249	2.89808e-28	1.06038e-26
P4ha1	3214.84	-1.10661	0.132827	-8.33119	8.00355e-17	9.90234e-16
Lgr5	38.4838	-1.10631	0.297498	-3.71873	0.000200225	0.00056116
Enpp2	571.758	-1.10553	0.211951	-5.21597	1.82861e-07	7.75293e-07
LOC100503212	14.7874	-1.10523	0.287755	-3.84086	0.000122605	0.00035424
Tram1l1	23.3155	-1.10451	0.255903	-4.31615	1.58777e-05	5.16357e-05
Csf1	2091.02	-1.10316	0.141703	-7.78501	6.97081e-15	7.12783e-14
Plod1	2238.33	-1.10309	0.100505	-10.9755	5.01345e-28	1.76829e-26
Ccl12	21.8493	-1.10295	0.347402	-3.17486	0.00149908	0.00359944
Tyro3	177.786	-1.10273	0.137922	-7.9953	1.29262e-15	1.42451e-14
Cfdp1	933.994	-1.10253	0.0682403	-16.1566	1.01991e-58	6.16834e-56
Klhl4	61.8474	-1.10203	0.183532	-6.00458	1.91828e-09	1.03996e-08
Ube2e2	132.319	-1.10157	0.10116	-10.8893	1.29571e-27	4.36781e-26
Plvap	1443.43	-1.09851	0.115819	-9.48476	2.42941e-21	4.70395e-20
Fos	1401.72	-1.09832	0.220314	-4.98526	6.1879e-07	2.43479e-06
Tvp23b	347.337	-1.09719	0.110843	-9.89851	4.22532e-23	9.55834e-22
Msr1	572.585	-1.09647	0.215446	-5.08928	3.59417e-07	1.46177e-06
Tmem176a	1090.15	-1.09609	0.146981	-7.45738	8.82575e-14	7.81248e-13
Fcrls	356.205	-1.09438	0.195445	-5.59941	2.15087e-08	1.02452e-07
Slc38a6	288.899	-1.09434	0.106078	-10.3164	5.93946e-25	1.57591e-23
Zswim6	707.92	-1.0943	0.0962453	-11.3699	5.90691e-30	2.56795e-28
Bhlha15	33.0163	-1.0941	0.273239	-4.00419	6.22297e-05	0.000187684
Arfgap3	1066.57	-1.09382	0.0906292	-12.0691	1.53724e-33	9.63728e-32
Raph1	1587.96	-1.09262	0.134291	-8.1362	4.07877e-16	4.7172e-15
Atp1b3	2247.84	-1.09234	0.136394	-8.00871	1.15918e-15	1.2829e-14
Anpep	659.066	-1.09131	0.117214	-9.31048	1.2725e-20	2.33006e-19
Arl4c	857.114	-1.09125	0.15599	-6.99562	2.64082e-12	1.97682e-11
Slamf9	67.1501	-1.09032	0.183587	-5.93896	2.86841e-09	1.51799e-08
Selenos	292.916	-1.08984	0.102721	-10.6097	2.68699e-26	8.14933e-25
Gm10647	21.1605	-1.08922	0.239832	-4.54159	5.58319e-06	1.93441e-05
Tnnt2	292.644	-1.08886	0.337127	-3.22984	0.00123861	0.00302309
Zfp810	164.578	-1.08816	0.112673	-9.65769	4.56032e-22	9.40561e-21
Lca5l	61.048	-1.08796	0.199516	-5.45303	4.95201e-08	2.25483e-07
Pgrmc1	894.411	-1.08742	0.0896933	-12.1238	7.90158e-34	5.09347e-32
Sec22a	246.844	-1.08704	0.0977247	-11.1235	9.6434e-29	3.66538e-27
2010204K13Rik	11.6503	-1.08661	0.337723	-3.21747	0.00129328	0.00314383
Triqk	59.0742	-1.08561	0.18383	-5.90554	3.51494e-09	1.83726e-08
Dcbld1	112.817	-1.08555	0.15834	-6.85581	7.09101e-12	5.05942e-11
Usp43	15.3668	-1.08493	0.23302	-4.65595	3.22491e-06	1.15368e-05
Apcdd1	355.133	-1.08463	0.198376	-5.46754	4.56314e-08	2.08654e-07
Rabl2	79.9731	-1.08462	0.149986	-7.23148	4.77761e-13	3.89385e-12
Entpd7	520.687	-1.08405	0.131217	-8.26152	1.43827e-16	1.73869e-15
Sbsn	140.731	-1.08378	0.238829	-4.53789	5.68199e-06	1.96599e-05
Btg1	2042.24	-1.08289	0.115816	-9.35006	8.75984e-21	1.62278e-19
Sh3gl1	1352.96	-1.08274	0.0684452	-15.8191	2.29602e-56	1.15154e-53
Emp1	4980.91	-1.08191	0.105825	-10.2236	1.55523e-24	4.01256e-23
Myo5a	3180.82	-1.08176	0.0957531	-11.2974	1.35232e-29	5.652e-28
Ggt5	407.915	-1.08093	0.111861	-9.66311	4.32543e-22	8.95708e-21
E030011O05Rik	39.9705	-1.07972	0.199704	-5.40661	6.42293e-08	2.88625e-07
Hmgn1	678.235	-1.07928	0.104141	-10.3636	3.63072e-25	9.87547e-24
Tusc3	446.179	-1.07863	0.117136	-9.20842	3.30953e-20	5.84655e-19
Clcn5	370.128	-1.07862	0.110986	-9.71844	2.516e-22	5.33916e-21
Nagk	324.523	-1.07828	0.10628	-10.1456	3.46485e-24	8.61521e-23
Pros1	1296.05	-1.07727	0.103116	-10.4472	1.50975e-25	4.29986e-24
Cfap300	48.2464	-1.07696	0.210133	-5.12514	2.97313e-07	1.22289e-06
Farp2	705.85	-1.07551	0.138043	-7.79114	6.64089e-15	6.80741e-14
Itm2a	3210.16	-1.07515	0.221916	-4.84487	1.26692e-06	4.78276e-06
Pcdh18	900.438	-1.07501	0.121909	-8.81812	1.164e-18	1.71949e-17
Dstn	2532.47	-1.07497	0.119168	-9.02059	1.87077e-19	3.01007e-18
Gamt	186.741	-1.07488	0.184773	-5.81732	5.97997e-09	3.0392e-08
Plau	927.157	-1.07476	0.139503	-7.70423	1.31634e-14	1.30322e-13
Wtip	407.831	-1.07381	0.0881111	-12.187	3.64641e-34	2.41875e-32
Trmt61a	284.913	-1.07373	0.107569	-9.98185	1.83026e-23	4.27678e-22
Gnai1	581.696	-1.07352	0.168332	-6.37741	1.80111e-10	1.09542e-09
Vnn1	13.7621	-1.07346	0.428429	-2.50557	0.0122254	0.0246171
Ggcx	1057.23	-1.07346	0.118334	-9.0714	1.17493e-19	1.94368e-18
Calr	6417.24	-1.07217	0.09925	-10.8027	3.34224e-27	1.09263e-25
Ext1	1909.35	-1.07058	0.0977535	-10.9518	6.51163e-28	2.2618e-26
Akr1a1	4288.03	-1.07034	0.0719775	-14.8704	5.12879e-50	1.64787e-47
Col11a1	44629	-1.07011	0.223602	-4.7858	1.70309e-06	6.31572e-06
9130024F11Rik	322.324	-1.06992	0.237102	-4.5125	6.4069e-06	2.20037e-05
Ebp	560.012	-1.06975	0.112757	-9.48722	2.37284e-21	4.60308e-20
Il10	12.2629	-1.06972	0.427296	-2.50347	0.0122982	0.0247468
Prex1	2322.28	-1.06957	0.143366	-7.46044	8.62368e-14	7.64348e-13
Ap1s1	615.438	-1.06873	0.0933079	-11.4539	2.24915e-30	1.03235e-28
Slc39a10	602.063	-1.06863	0.0848985	-12.5872	2.48353e-36	1.98711e-34
Ube2ql1	120.888	-1.0676	0.156518	-6.82095	9.0442e-12	6.35598e-11
Plk2	631.94	-1.06751	0.171335	-6.23053	4.64858e-10	2.69416e-09
Plekho1	828.696	-1.06749	0.0749126	-14.2498	4.49555e-46	9.33757e-44
Chst7	137.496	-1.06691	0.163732	-6.51623	7.20969e-11	4.5842e-10
2700069I18Rik	10.0299	-1.06623	0.313967	-3.39601	0.00068376	0.00174899
Abcg1	725.289	-1.06614	0.112337	-9.49053	2.29857e-21	4.46322e-20
Amz1	103.197	-1.06591	0.179303	-5.94473	2.76912e-09	1.46984e-08
Gga2	784.951	-1.06523	0.0710858	-14.9851	9.1893e-51	3.2027e-48
Pja1	774.231	-1.06516	0.0928109	-11.4766	1.72889e-30	8.04325e-29
Cd83	163.896	-1.06482	0.196964	-5.40618	6.4384e-08	2.89257e-07
Kdelr1	2321.68	-1.06408	0.0693242	-15.3493	3.58137e-53	1.50293e-50
Tlcd3a	128.091	-1.06368	0.159547	-6.66689	2.61288e-11	1.74898e-10
Anxa4	1143.82	-1.06334	0.0835493	-12.7271	4.18274e-37	3.69141e-35
Uchl1	140.784	-1.06237	0.131635	-8.07056	6.9975e-16	7.88042e-15
Mxd4	1293.43	-1.06	0.124269	-8.52986	1.46526e-17	1.95397e-16
Faim	111.473	-1.05989	0.10842	-9.77579	1.43033e-22	3.10016e-21
Ccn5	591.594	-1.05961	0.210436	-5.03531	4.77064e-07	1.90742e-06
Bdkrb1	51.0964	-1.05876	0.328529	-3.22272	0.0012698	0.00309224
Cyp20a1	432.883	-1.05805	0.0926535	-11.4194	3.34488e-30	1.50177e-28
Tram1	3385.07	-1.05743	0.0963985	-10.9694	5.36209e-28	1.87838e-26
Fads3	1346.62	-1.05665	0.126743	-8.33692	7.62533e-17	9.45146e-16
B4galt7	378.614	-1.05645	0.0953451	-11.0803	1.56309e-28	5.82279e-27
Zfp995	27.8354	-1.05616	0.179085	-5.89755	3.68942e-09	1.92552e-08
Ier5l	251.396	-1.05517	0.13032	-8.09674	5.64531e-16	6.42772e-15
Slc44a1	1411.03	-1.05307	0.0889411	-11.8401	2.42125e-32	1.36033e-30
Steap4	1299.07	-1.05291	0.124965	-8.42566	3.58721e-17	4.59874e-16
Faxc	168.044	-1.05272	0.139657	-7.53793	4.77484e-14	4.38326e-13
Ppp1r14b	387.707	-1.05271	0.140721	-7.48082	7.38603e-14	6.60056e-13
Tmem132a	673.925	-1.05218	0.100059	-10.5157	7.31711e-26	2.13724e-24
Gm2a	1740.36	-1.05159	0.103299	-10.1801	2.43316e-24	6.14656e-23
Cspg4	4156.3	-1.05111	0.14947	-7.03229	2.03166e-12	1.54216e-11
Esyt3	57.6904	-1.05059	0.24033	-4.37145	1.23423e-05	4.0667e-05
Crlf1	209.23	-1.05005	0.214349	-4.89879	9.64294e-07	3.70354e-06
Efs	636.992	-1.04983	0.131835	-7.96324	1.67589e-15	1.82819e-14
Arhgef19	403.381	-1.04948	0.129416	-8.10932	5.09025e-16	5.82151e-15
Fgd6	535.83	-1.04922	0.125499	-8.36035	6.25306e-17	7.80228e-16
Efna2	63.2539	-1.04918	0.194833	-5.38504	7.2428e-08	3.2391e-07
Pcdhb19	110.69	-1.04914	0.115673	-9.06983	1.19204e-19	1.96567e-18
Slc39a11	536.218	-1.04887	0.118739	-8.83344	1.01502e-18	1.51057e-17
Rtl3	361.408	-1.04873	0.271391	-3.86428	0.000111418	0.000323599
Pter	177.298	-1.0482	0.107214	-9.77671	1.41738e-22	3.07767e-21
Emp3	1376.59	-1.04819	0.154186	-6.79822	1.05922e-11	7.39584e-11
Cpxm1	1019.97	-1.04768	0.191364	-5.47479	4.38025e-08	2.00783e-07
6430562O15Rik	21.4028	-1.04747	0.234626	-4.46442	8.02863e-06	2.71668e-05
Sec31a	4616.82	-1.04719	0.0888864	-11.7812	4.87996e-32	2.71207e-30
Cttn	2161.56	-1.04646	0.0825656	-12.6743	8.21141e-37	7.00628e-35
Col6a6	88.3576	-1.0456	0.351697	-2.97301	0.00294899	0.00670575
Csnk1g3	714.301	-1.04559	0.0645104	-16.2081	4.41946e-59	2.75386e-56
Rap2a	650.884	-1.04412	0.0911931	-11.4496	2.36333e-30	1.08234e-28
Hspb11	40.9034	-1.04352	0.209288	-4.98607	6.16204e-07	2.42507e-06
AI506816	79.6966	-1.04293	0.16526	-6.31086	2.77497e-10	1.65636e-09
Slc30a7	1392.17	-1.04157	0.0825922	-12.611	1.8358e-36	1.49208e-34
Dsel	746.254	-1.04068	0.136349	-7.63245	2.30326e-14	2.20185e-13
Lnx2	549.908	-1.0403	0.109061	-9.53869	1.44644e-21	2.85991e-20
Ptprk	836.398	-1.03889	0.112564	-9.22937	2.72233e-20	4.84669e-19
A930004D18Rik	42.1933	-1.03826	0.235688	-4.40524	1.05669e-05	3.51312e-05
Armcx1	233.319	-1.03815	0.106211	-9.77441	1.44996e-22	3.13847e-21
Col6a3	26555.9	-1.03786	0.176636	-5.8757	4.2107e-09	2.18042e-08
Rpl41	1015.83	-1.03675	0.169829	-6.10468	1.03008e-09	5.76209e-09
Eif5a2	214.408	-1.0367	0.0996853	-10.3997	2.48773e-25	6.89423e-24
Nxpe5	101.704	-1.03636	0.206412	-5.02082	5.14518e-07	2.04524e-06
Tnfsf15	13.4512	-1.03572	0.356396	-2.90609	0.00365976	0.0081773
Psmd10	184.795	-1.03538	0.10247	-10.1042	5.29064e-24	1.29206e-22
Enpp1	1437.16	-1.03523	0.147025	-7.04116	1.90641e-12	1.45191e-11
Tmem120a	345.365	-1.03352	0.104011	-9.93668	2.88277e-23	6.63812e-22
P3h3	1544.71	-1.03289	0.132794	-7.7781	7.36208e-15	7.48697e-14
Pcdhb21	50.2136	-1.03239	0.152175	-6.78423	1.16711e-11	8.11608e-11
Slc27a3	353.825	-1.03217	0.140273	-7.35832	1.86242e-13	1.59437e-12
Lrp12	388.068	-1.03194	0.108803	-9.48447	2.43609e-21	4.71245e-20
Zdhhc15	119.854	-1.03175	0.157906	-6.53396	6.40517e-11	4.11335e-10
Ptprf	1598.32	-1.03121	0.128222	-8.04244	8.80678e-16	9.84205e-15
Enpp6	415.991	-1.03098	0.208109	-4.95405	7.26864e-07	2.83507e-06
Hoxa1	18.4624	-1.03093	0.245889	-4.19267	2.75685e-05	8.68667e-05
Col6a1	19034.1	-1.02993	0.153394	-6.7143	1.88976e-11	1.28206e-10
Naa80	428.88	-1.02949	0.106454	-9.6707	4.01627e-22	8.34207e-21
Slc7a6	698.334	-1.02928	0.089236	-11.5344	8.8491e-31	4.26145e-29
Ssr3	6282.16	-1.02845	0.0888145	-11.5797	5.22143e-31	2.61237e-29
Igfbp7	4206.96	-1.0276	0.131958	-7.78733	6.84377e-15	7.0049e-14
Mid2	507.713	-1.02715	0.107643	-9.54215	1.39898e-21	2.76874e-20
Zdhhc20	977.583	-1.02641	0.0784634	-13.0814	4.20812e-39	4.68996e-37
Prr5l	218.21	-1.02634	0.137653	-7.45595	8.92217e-14	7.89104e-13
Anxa2	6838.47	-1.02569	0.118714	-8.63997	5.62293e-18	7.79139e-17
Ecscr	243.721	-1.02544	0.167369	-6.12679	8.96694e-10	5.04755e-09
Lrrn3	98.5528	-1.02509	0.175064	-5.85551	4.75544e-09	2.4471e-08
Prelid1	1210.44	-1.02499	0.11816	-8.6746	4.15009e-18	5.83709e-17
Mfsd11	401.298	-1.02382	0.071177	-14.3842	6.50496e-47	1.50294e-44
Fads2	735.589	-1.02381	0.165586	-6.18293	6.29246e-10	3.59122e-09
Slc10a3	330.968	-1.02307	0.0984091	-10.3961	2.58192e-25	7.11688e-24
Morrbid	154.164	-1.02268	0.116297	-8.7937	1.44719e-18	2.12107e-17
Col6a2	14701.4	-1.02182	0.175902	-5.80905	6.28292e-09	3.18687e-08
1700030C10Rik	17.2073	-1.02163	0.284171	-3.59512	0.000324239	0.000875206
Atp1a1	7134.88	-1.0208	0.10369	-9.84475	7.22203e-23	1.60201e-21
Rpn1	4046.85	-1.02078	0.100896	-10.1172	4.63457e-24	1.13995e-22
Cyp51	675.607	-1.02047	0.151219	-6.74829	1.49595e-11	1.02777e-10
Prlr	23.9266	-1.01918	0.330798	-3.08097	0.00206329	0.00482898
Cdc16	1310.13	-1.0164	0.0780212	-13.0272	8.57144e-39	9.08528e-37
Plpp5	680.52	-1.01593	0.0935105	-10.8643	1.70501e-27	5.70084e-26
Islr	2199.2	-1.01586	0.141823	-7.16286	7.90112e-13	6.27058e-12
Chsy3	441.942	-1.01578	0.122074	-8.32106	8.71825e-17	1.07221e-15
Cercam	1032.51	-1.01547	0.111162	-9.13499	6.54113e-20	1.11901e-18
Casp3	351.731	-1.01458	0.118601	-8.55454	1.18344e-17	1.59784e-16
Layn	171.691	-1.01435	0.125847	-8.06019	7.61762e-16	8.55028e-15
Armcx6	64.2734	-1.01335	0.184926	-5.47976	4.259e-08	1.95562e-07
4930556M19Rik	35.2109	-1.01326	0.192395	-5.26658	1.38985e-07	5.98649e-07
Asah1	1252.22	-1.01234	0.0959264	-10.5533	4.90401e-26	1.45304e-24
Zfp266	1437.38	-1.01208	0.0731601	-13.8337	1.59508e-43	2.75628e-41
Osbpl10	66.7007	-1.01159	0.152568	-6.6304	3.34778e-11	2.21637e-10
Fndc4	329.84	-1.01131	0.138118	-7.32208	2.44148e-13	2.05839e-12
Sh3pxd2b	4363.92	-1.01129	0.15472	-6.53626	6.30752e-11	4.05317e-10
Stk3	432.377	-1.01083	0.0745625	-13.5567	7.22741e-42	1.05402e-39
Tns3	3869.01	-1.0103	0.112445	-8.98484	2.5912e-19	4.11768e-18
Pxylp1	900.714	-1.00892	0.149113	-6.76613	1.32271e-11	9.14248e-11
Gm6929	19.52	-1.00884	0.214596	-4.7011	2.58765e-06	9.36791e-06
Wdr6	711.994	-1.00821	0.124114	-8.1233	4.5369e-16	5.22939e-15
Smad1	819.51	-1.00815	0.0761386	-13.241	5.08491e-40	6.29886e-38
Slc30a6	225.38	-1.00809	0.094008	-10.7235	7.89764e-27	2.51392e-25
Slc17a5	332.844	-1.0071	0.0795665	-12.6573	1.0189e-36	8.48988e-35
Duoxa1	29.3239	-1.00636	0.22643	-4.44448	8.81041e-06	2.96027e-05
Cibar1	217.085	-1.006	0.117347	-8.57285	1.00955e-17	1.36845e-16
Spi1	1100.7	-1.00529	0.162487	-6.18693	6.1349e-10	3.50714e-09
Grb14	465.019	-1.00528	0.195379	-5.1453	2.67098e-07	1.1051e-06
Tmppe	489.608	-1.00455	0.096616	-10.3974	2.54817e-25	7.04273e-24
Septin10	255.139	-1.00435	0.117623	-8.53877	1.3566e-17	1.82057e-16
Ajuba	348.296	-1.00361	0.15282	-6.56724	5.12562e-11	3.32276e-10
Igfbp2	36.7297	-1.00257	0.373293	-2.68574	0.00723686	0.0152847
Gper1	221.93	-1.00131	0.124563	-8.03856	9.08987e-16	1.01529e-14
Cep41	132.896	-1.00068	0.116894	-8.56057	1.12311e-17	1.51937e-16
Dixdc1	277.476	-1.0005	0.17899	-5.5897	2.27459e-08	1.08036e-07
Slc7a7	275.041	-0.999509	0.110011	-9.08558	1.03152e-19	1.72168e-18
Atp6ap1	3304.81	-0.999496	0.0672482	-14.8628	5.74761e-50	1.81828e-47
M6pr	1694.8	-0.999121	0.089519	-11.161	6.32797e-29	2.45513e-27
Rpn2	3070.95	-0.998849	0.0975629	-10.238	1.33966e-24	3.47822e-23
Pdia6	3852.34	-0.998412	0.0996764	-10.0165	1.28947e-23	3.05829e-22
Pald1	745.156	-0.998189	0.104963	-9.50993	1.90787e-21	3.72569e-20
Agbl2	18.2811	-0.99811	0.341562	-2.92219	0.00347574	0.00780344
Srprb	1341.68	-0.998087	0.0797607	-12.5135	6.29655e-36	4.84929e-34
Cfap161	18.7714	-0.99771	0.334695	-2.98095	0.00287356	0.00654726
Spaca1	11.0866	-0.997526	0.305914	-3.26081	0.00111096	0.00273294
Cda	37.2077	-0.99741	0.307084	-3.24801	0.00116215	0.00284662
Gsg1	13.5732	-0.997316	0.300851	-3.31498	0.000916484	0.00229071
Cetn4	12.3347	-0.997278	0.316166	-3.15429	0.00160891	0.00384207
Arhgap42	447.786	-0.997219	0.109437	-9.11231	8.0649e-20	1.36156e-18
Ssr1	3968.55	-0.997013	0.0853568	-11.6805	1.60296e-31	8.4301e-30
Tm4sf1	1292.91	-0.996106	0.153535	-6.48783	8.70815e-11	5.48105e-10
Xkr8	149.072	-0.995335	0.0961835	-10.3483	4.25998e-25	1.1526e-23
Kcp	80.5907	-0.995271	0.196302	-5.07012	3.97574e-07	1.60836e-06
Arcn1	2724.4	-0.995193	0.0649227	-15.3289	4.90252e-53	1.97668e-50
Bzw1	1856.36	-0.994374	0.0889875	-11.1743	5.44675e-29	2.13743e-27
Gli2	181.164	-0.993073	0.189145	-5.25033	1.51827e-07	6.50013e-07
Snd1	4376.36	-0.992023	0.0751246	-13.205	8.20599e-40	9.81045e-38
Cox8a	1444.9	-0.992	0.12002	-8.2653	1.39338e-16	1.6856e-15
Txndc12	392.511	-0.991539	0.078073	-12.7002	5.90132e-37	5.07736e-35
Cyp4f16	142.95	-0.991361	0.118207	-8.38665	5.00211e-17	6.31421e-16
Eml4	1140.1	-0.990469	0.0881664	-11.2341	2.77337e-29	1.12261e-27
Cd302	336.273	-0.990419	0.137583	-7.19868	6.07991e-13	4.8932e-12
Ankrd42	57.9502	-0.990399	0.141599	-6.9944	2.6639e-12	1.99264e-11
Septin2	3956.94	-0.990046	0.0876999	-11.289	1.48685e-29	6.20165e-28
Emilin1	5867.79	-0.989882	0.110506	-8.95775	3.31382e-19	5.23365e-18
Prcp	937.906	-0.988466	0.11131	-8.88032	6.66707e-19	1.01157e-17
Ftl1	3465.46	-0.988443	0.129986	-7.60422	2.86632e-14	2.71488e-13
Gm17308	13.9093	-0.9883	0.28134	-3.51283	0.000443355	0.00117181
Golm2	725.981	-0.988173	0.102324	-9.6573	4.57764e-22	9.43186e-21
Mrc2	4865.88	-0.986312	0.109126	-9.03831	1.59113e-19	2.57829e-18
Cmpk1	1042.27	-0.985155	0.0887553	-11.0997	1.25902e-28	4.73296e-27
Slco2a1	345.311	-0.985108	0.169166	-5.82331	5.76933e-09	2.93941e-08
Rcn2	795.405	-0.98423	0.112766	-8.72811	2.58972e-18	3.72134e-17
Tmem35a	23.8799	-0.983627	0.252178	-3.90053	9.59831e-05	0.000281475
Rapgefl1	85.5968	-0.981527	0.248094	-3.95627	7.61284e-05	0.000226382
Lix1l	842.428	-0.98152	0.10506	-9.34251	9.40776e-21	1.74124e-19
Shf	285.648	-0.981444	0.131443	-7.46669	8.22368e-14	7.30469e-13
Marveld1	1429.23	-0.981257	0.0899976	-10.9031	1.11339e-27	3.77178e-26
Ddb1	8341.74	-0.981177	0.0736342	-13.325	1.65575e-40	2.16862e-38
Egfr	1491.37	-0.98034	0.153253	-6.39689	1.5857e-10	9.72174e-10
Efna1	341.734	-0.979722	0.13671	-7.16641	7.69914e-13	6.13634e-12
Prdm5	292.919	-0.979323	0.117926	-8.30455	1.00194e-16	1.2271e-15
Tmem189	715.686	-0.979147	0.0961018	-10.1886	2.22853e-24	5.66444e-23
Gba	823.251	-0.979139	0.0764534	-12.807	1.498e-37	1.413e-35
Stac2	40.1899	-0.978933	0.212598	-4.60463	4.13206e-06	1.45542e-05
Luzp1	2217.77	-0.978585	0.0837649	-11.6825	1.56595e-31	8.25658e-30
Adgrl2	632.448	-0.978427	0.0894968	-10.9325	8.05654e-28	2.77034e-26
Ctsb	14991.4	-0.978188	0.108493	-9.01615	1.94812e-19	3.13206e-18
Colgalt1	3418.04	-0.977911	0.0588347	-16.6213	4.8842e-62	3.71977e-59
Gm4887	11.3953	-0.976203	0.322103	-3.03072	0.00243972	0.00563559
Cyfip1	2261.31	-0.974956	0.0671476	-14.5196	9.10481e-48	2.2832e-45
Glis3	671.209	-0.974727	0.149452	-6.52199	6.93784e-11	4.42228e-10
Plekha8	347.46	-0.974572	0.0975684	-9.98861	1.70958e-23	4.02221e-22
Rrbp1	11137.3	-0.973253	0.11176	-8.70841	3.08167e-18	4.3884e-17
Fjx1	138.907	-0.972562	0.18443	-5.27334	1.33961e-07	5.78463e-07
Pcdhb16	147.243	-0.971404	0.148753	-6.53031	6.56342e-11	4.20185e-10
Emid1	165.059	-0.971327	0.164446	-5.90666	3.49111e-09	1.8262e-08
Decr2	201.582	-0.971211	0.0851358	-11.4078	3.82379e-30	1.70192e-28
Tulp3	305.877	-0.971068	0.0931329	-10.4267	1.87293e-25	5.26853e-24
Rpl27a	2092.61	-0.970263	0.152363	-6.36811	1.91377e-10	1.16017e-09
Slfn9	222.126	-0.970245	0.172734	-5.617	1.94304e-08	9.32216e-08
Trpv2	395.134	-0.970079	0.109808	-8.83428	1.00743e-18	1.50115e-17
Cp	1421.82	-0.969844	0.146982	-6.59838	4.1568e-11	2.72044e-10
Tbl2	961.874	-0.969821	0.0880859	-11.0099	3.42199e-28	1.23667e-26
Tspan31	1014.42	-0.969712	0.060174	-16.1151	1.99762e-58	1.17363e-55
E2f5	152.455	-0.969403	0.104972	-9.23484	2.5867e-20	4.61722e-19
Rpl22l1	129.671	-0.969402	0.149241	-6.49554	8.27384e-11	5.22527e-10
Tmem158	143.63	-0.969142	0.152316	-6.36272	1.98218e-10	1.20022e-09
Tnfaip6	346.127	-0.967859	0.199305	-4.85616	1.19684e-06	4.53483e-06
Bex3	225.149	-0.967632	0.155197	-6.23485	4.52223e-10	2.62463e-09
Rhpn2	114.044	-0.967156	0.157841	-6.12742	8.93171e-10	5.0291e-09
Enpp3	105.939	-0.965961	0.154362	-6.25778	3.90499e-10	2.28926e-09
Calm2	3132.05	-0.965345	0.0852819	-11.3195	1.05118e-29	4.45679e-28
Olfml2a	512.728	-0.964365	0.145612	-6.62283	3.52392e-11	2.32475e-10
Copg1	3306.81	-0.963935	0.0847299	-11.3766	5.47121e-30	2.39882e-28
Nab2	735.849	-0.963814	0.10465	-9.20986	3.26556e-20	5.77574e-19
Leprot	939.025	-0.963369	0.0984676	-9.78361	1.32397e-22	2.88093e-21
Chst11	2771.96	-0.962905	0.162833	-5.91346	3.34986e-09	1.75588e-08
Tuft1	49.4482	-0.962816	0.138032	-6.97531	3.05196e-12	2.26889e-11
Tpm4	7148.17	-0.962324	0.0922766	-10.4287	1.83397e-25	5.17311e-24
Lum	8458.42	-0.962097	0.196666	-4.89204	9.97946e-07	3.82066e-06
Pcdhb14	85.5941	-0.961375	0.16876	-5.69672	1.22135e-08	5.99967e-08
Kif26b	269.001	-0.961022	0.179285	-5.36029	8.30877e-08	3.68536e-07
Erf	938.305	-0.959393	0.0869242	-11.0371	2.53033e-28	9.29127e-27
Gpr39	14.4713	-0.958757	0.424668	-2.25766	0.0239666	0.045011
Smco4	166.298	-0.958235	0.168522	-5.68613	1.29953e-08	6.36546e-08
Abracl	334.57	-0.957762	0.132326	-7.23792	4.55631e-13	3.72087e-12
Mcfd2	1319.11	-0.957236	0.077757	-12.3106	7.94263e-35	5.53641e-33
Ak5	109.113	-0.957012	0.157941	-6.05931	1.36708e-09	7.53453e-09
Frmd6	1196.77	-0.956725	0.0699964	-13.6682	1.5722e-42	2.46787e-40
Pkd1l2	19.467	-0.956402	0.358301	-2.66927	0.00760161	0.0159943
Gli1	181.986	-0.956358	0.209239	-4.57065	4.86215e-06	1.69948e-05
Ddah2	454.131	-0.95617	0.137287	-6.96478	3.28926e-12	2.43737e-11
Rasgef1b	222.735	-0.955243	0.152937	-6.24597	4.21172e-10	2.45759e-09
Socs3	1893.59	-0.955238	0.170669	-5.59703	2.18055e-08	1.03817e-07
A730049H05Rik	27.9504	-0.954744	0.27714	-3.44499	0.000571078	0.00148459
Scfd1	648.08	-0.954106	0.0958066	-9.95866	2.31152e-23	5.35906e-22
Itgb8	44.7171	-0.95299	0.176523	-5.39867	6.71358e-08	3.00897e-07
Cadps2	106.315	-0.951977	0.184119	-5.17044	2.33539e-07	9.75671e-07
Tmed9	1333.8	-0.951528	0.0924798	-10.289	7.89695e-25	2.07919e-23
Zfp184	19.3509	-0.951314	0.220078	-4.32263	1.54182e-05	5.02207e-05
Tmem258	449.765	-0.951298	0.146536	-6.49192	8.47504e-11	5.34578e-10
Mmp27	14.853	-0.950335	0.341081	-2.78624	0.0053323	0.0115736
Dnm3os	1438.56	-0.949397	0.150595	-6.30432	2.89455e-10	1.72573e-09
Rpl3	1633.87	-0.949146	0.11068	-8.57561	9.85605e-18	1.33687e-16
Wscd2	187.153	-0.948514	0.32972	-2.87673	0.00401819	0.00892194
Plekhf1	492.098	-0.947432	0.116105	-8.16012	3.34695e-16	3.91264e-15
Hsd17b12	547.29	-0.947423	0.113148	-8.37332	5.60158e-17	7.02349e-16
Mettl24	27.8491	-0.947388	0.204326	-4.63666	3.54085e-06	1.26035e-05
Nim1k	148.92	-0.94695	0.199758	-4.74049	2.13204e-06	7.79676e-06
Gm19514	150.921	-0.946689	0.248218	-3.81395	0.000136765	0.00039234
Tmem151a	51.6478	-0.945919	0.213277	-4.43516	9.2005e-06	3.08479e-05
Cd96	23.1451	-0.945838	0.211781	-4.46611	7.96538e-06	2.69835e-05
Hebp2	86.7894	-0.945641	0.199102	-4.74954	2.03881e-06	7.4811e-06
Spin4	77.9283	-0.945483	0.152945	-6.18185	6.33532e-10	3.61368e-09
Rin1	147.863	-0.945134	0.104418	-9.05146	1.41073e-19	2.29864e-18
Pdgfa	610.189	-0.944682	0.109367	-8.63771	5.73511e-18	7.94148e-17
Cyp7b1	32.3838	-0.944289	0.228732	-4.12837	3.65348e-05	0.000113245
Uba5	750.877	-0.943921	0.0735233	-12.8384	9.99288e-38	9.64712e-36
Clec11a	2701.84	-0.943615	0.157779	-5.9806	2.22315e-09	1.19609e-08
Tubb3	223.857	-0.943435	0.256102	-3.68383	0.000229754	0.000636201
Fgfr3	1587.9	-0.943352	0.238276	-3.95907	7.52407e-05	0.000223936
Tyrobp	1190.54	-0.943097	0.1543	-6.11211	9.83242e-10	5.51361e-09
Itga10	1309.8	-0.94303	0.184302	-5.11677	3.10814e-07	1.27494e-06
Smarca1	306.716	-0.940635	0.167614	-5.6119	2.00117e-08	9.57644e-08
Tspan17	288.693	-0.940291	0.0777458	-12.0944	1.13039e-33	7.13013e-32
Nrk	215.773	-0.939183	0.230772	-4.06975	4.70638e-05	0.000144035
Tmem176b	1474.47	-0.937968	0.144837	-6.47602	9.41735e-11	5.90393e-10
H3c14	76.3179	-0.937748	0.164673	-5.69462	1.23645e-08	6.07092e-08
Hmgcr	1220.38	-0.937671	0.116322	-8.06096	7.56947e-16	8.50552e-15
AW551984	105.234	-0.937639	0.330958	-2.8331	0.00460985	0.0101231
Gss	228.428	-0.936695	0.0794903	-11.7838	4.73251e-32	2.63725e-30
S1pr3	1231.57	-0.936593	0.163499	-5.72843	1.01365e-08	5.03108e-08
Fam149a	296.827	-0.935693	0.127357	-7.347	2.02698e-13	1.72663e-12
BC048671	11.1778	-0.935469	0.296827	-3.15156	0.00162398	0.00387315
Ergic3	974.208	-0.93536	0.0925106	-10.1108	4.94549e-24	1.21182e-22
Bad	284.475	-0.935287	0.114361	-8.17841	2.87617e-16	3.37593e-15
Jkamp	379.943	-0.935109	0.0809603	-11.5502	7.36296e-31	3.59631e-29
Otulinl	379.154	-0.935095	0.141067	-6.62873	3.38594e-11	2.24091e-10
Rpl32l	73.7771	-0.934967	0.206257	-4.53302	5.81474e-06	2.00787e-05
Nav3	891.124	-0.932729	0.132417	-7.04387	1.86972e-12	1.42608e-11
Exo5	118.87	-0.932521	0.118076	-7.8976	2.84324e-15	3.03245e-14
Gmfb	1292.32	-0.931986	0.0820851	-11.3539	7.09321e-30	3.05781e-28
Rilpl2	320.338	-0.931953	0.102982	-9.04966	1.43411e-19	2.33303e-18
Ralb	942.404	-0.931749	0.0713602	-13.057	5.79868e-39	6.34246e-37
Tbx18	242.011	-0.931404	0.12095	-7.70071	1.35312e-14	1.33706e-13
Prkcsh	1571.54	-0.931389	0.0872245	-10.6781	1.28935e-26	4.04159e-25
Rerg	227.647	-0.931102	0.219418	-4.2435	2.2006e-05	7.0124e-05
Septin11	3534.71	-0.931059	0.0775202	-12.0105	3.12862e-33	1.88662e-31
Tpp1	1347.79	-0.930974	0.065244	-14.2691	3.40913e-46	7.22701e-44
Phex	3434.93	-0.930961	0.207031	-4.49672	6.90094e-06	2.35839e-05
Gars	2136.76	-0.930535	0.0670283	-13.8827	8.06223e-44	1.41695e-41
Ece2	291.282	-0.930113	0.116288	-7.99833	1.26115e-15	1.392e-14
Stard3	488.744	-0.929853	0.0745996	-12.4646	1.16477e-35	8.7733e-34
Fam180a	217.705	-0.929832	0.356441	-2.60866	0.00908978	0.0188004
Pltp	701.468	-0.929502	0.119897	-7.75251	9.00949e-15	9.07703e-14
A930017M01Rik	33.4756	-0.92878	0.221016	-4.20233	2.64184e-05	8.34473e-05
Slc30a5	1136.27	-0.928575	0.0850541	-10.9175	9.51202e-28	3.24371e-26
Lgr6	238.102	-0.928159	0.208191	-4.4582	8.26515e-06	2.788e-05
Dnajb14	281.765	-0.928145	0.084372	-11.0006	3.79485e-28	1.36184e-26
Impa2	296.927	-0.92704	0.134056	-6.91529	4.66894e-12	3.40935e-11
Sema4d	1721.29	-0.926978	0.12627	-7.34121	2.11666e-13	1.80031e-12
Ppia	562.076	-0.926047	0.150824	-6.13992	8.25611e-10	4.65762e-09
Stambpl1	170.623	-0.925452	0.150389	-6.15371	7.56928e-10	4.2878e-09
Exoc3l	109.775	-0.925163	0.12911	-7.1657	7.73924e-13	6.16113e-12
Cryl1	136.338	-0.924269	0.121465	-7.60933	2.75519e-14	2.61203e-13
Atp6v1g1	424.062	-0.923957	0.117741	-7.8474	4.24756e-15	4.44492e-14
Mob3b	134.425	-0.923914	0.152379	-6.06325	1.33399e-09	7.36002e-09
Col11a2	25385.6	-0.923446	0.23861	-3.87011	0.000108786	0.000316229
Stx6	687.811	-0.923293	0.0671696	-13.7457	5.40441e-43	8.6821e-41
Asxl3	45.1801	-0.923284	0.214575	-4.30285	1.68617e-05	5.45854e-05
Dab2	1652.95	-0.922474	0.0923689	-9.98684	1.74044e-23	4.0808e-22
Gm5637	135.269	-0.922329	0.129449	-7.12502	1.04063e-12	8.14557e-12
Pcdhb17	157.199	-0.922186	0.143772	-6.41421	1.41554e-10	8.72272e-10
Arl1	686.836	-0.921902	0.0891065	-10.3461	4.35983e-25	1.17476e-23
Bc1	95.9875	-0.921486	0.249241	-3.69717	0.000218014	0.000606386
Fmnl3	1814.65	-0.920929	0.0974022	-9.45491	3.23286e-21	6.20123e-20
Cyb561d2	150.102	-0.920651	0.116774	-7.88405	3.16936e-15	3.36456e-14
Mmp2	12933.4	-0.920096	0.151432	-6.07597	1.23237e-09	6.83606e-09
Ccdc149	109.609	-0.919803	0.14117	-6.51556	7.24213e-11	4.6034e-10
Sdc3	6524.38	-0.919746	0.126835	-7.25151	4.12139e-13	3.38586e-12
Mcub	150.165	-0.919414	0.15108	-6.0856	1.16055e-09	6.46209e-09
Arfip2	697.581	-0.91902	0.087441	-10.5102	7.7549e-26	2.2619e-24
Mphosph6	179.641	-0.918892	0.152726	-6.01661	1.78105e-09	9.69139e-09
Galnt7	400.182	-0.918841	0.0941761	-9.75663	1.72802e-22	3.7091e-21
Ptgis	1569.1	-0.918831	0.156898	-5.85622	4.73525e-09	2.43793e-08
Zfp647	65.7394	-0.918483	0.113185	-8.11487	4.86318e-16	5.58356e-15
Ggt7	89.0487	-0.917986	0.139439	-6.58342	4.59733e-11	2.9954e-10
Fubp3	668.959	-0.917865	0.0641668	-14.3044	2.05533e-46	4.44882e-44
Aga	271.014	-0.917682	0.12389	-7.40723	1.28961e-13	1.12223e-12
Tbc1d2b	2412.74	-0.91709	0.0948189	-9.67201	3.96494e-22	8.25213e-21
Gm266	59.601	-0.916671	0.210146	-4.36207	1.28839e-05	4.23349e-05
Mir99ahg	133.311	-0.915764	0.119555	-7.65979	1.86244e-14	1.80563e-13
Elk3	1183.16	-0.915414	0.0732516	-12.4968	7.76685e-36	5.91517e-34
Tank	548.384	-0.915163	0.0877121	-10.4337	1.73947e-25	4.92003e-24
Eaf1	1133.24	-0.915033	0.0889991	-10.2814	8.5502e-25	2.24831e-23
Atp10a	900.316	-0.914834	0.087748	-10.4257	1.89271e-25	5.30967e-24
Arpc1b	3450.47	-0.914656	0.102671	-8.90859	5.16865e-19	7.97321e-18
Gpr55	20.9541	-0.91455	0.29586	-3.09116	0.00199377	0.00468148
Col4a1	16002.8	-0.914213	0.151151	-6.04834	1.46345e-09	8.03336e-09
Lbh	1353.81	-0.913463	0.121286	-7.53149	5.01628e-14	4.59055e-13
Ywhaq	656.285	-0.913302	0.0996107	-9.16872	4.78675e-20	8.25754e-19
Glmp	846.404	-0.913263	0.0797327	-11.4541	2.24379e-30	1.03219e-28
Stab1	3915.01	-0.91324	0.134898	-6.76984	1.28929e-11	8.92946e-11
Eef1b2	2799.06	-0.91253	0.100597	-9.07118	1.17733e-19	1.94605e-18
Myzap	165.968	-0.912469	0.195385	-4.67012	3.01024e-06	1.08103e-05
Arl14ep	443.052	-0.911126	0.0855172	-10.6543	1.66501e-26	5.16403e-25
Skap2	775.804	-0.910861	0.109581	-8.31221	9.39377e-17	1.15184e-15
Rnf227	36.7929	-0.910456	0.165148	-5.51298	3.528e-08	1.6402e-07
Lrp11	79.7712	-0.91021	0.144569	-6.29604	3.05342e-10	1.81414e-09
Mpdu1	503.601	-0.909838	0.106597	-8.53529	1.39805e-17	1.86919e-16
Ccdc88a	1596.28	-0.909535	0.0919692	-9.88957	4.62028e-23	1.04174e-21
Gucy1a1	656.77	-0.90952	0.15271	-5.95585	2.5873e-09	1.3783e-08
Rgs16	223.371	-0.909195	0.158541	-5.73477	9.76472e-09	4.85474e-08
Lrrc25	228.469	-0.909036	0.117439	-7.7405	9.90285e-15	9.91394e-14
Sfrp1	860.151	-0.908564	0.17775	-5.11146	3.19672e-07	1.3097e-06
Meis3	199.971	-0.906648	0.124033	-7.30972	2.67704e-13	2.24778e-12
Fbxo4	194.797	-0.906642	0.0873626	-10.3779	3.12518e-25	8.53426e-24
Trmt10a	113.37	-0.906202	0.11657	-7.77389	7.6112e-15	7.72503e-14
Kif7	300.734	-0.906139	0.126951	-7.13771	9.49006e-13	7.47106e-12
Sh3bgrl3	2002.18	-0.905772	0.166307	-5.4464	5.14005e-08	2.33632e-07
Pdzd11	300.517	-0.905693	0.0944841	-9.58567	9.18592e-22	1.84283e-20
2310022B05Rik	1258.4	-0.905644	0.129779	-6.97836	2.98652e-12	2.22346e-11
Gdi2	3630.92	-0.905158	0.075635	-11.9675	5.26209e-33	3.10932e-31
Lfng	734.879	-0.904841	0.135928	-6.65678	2.79889e-11	1.86439e-10
Tmem39a	828.626	-0.904752	0.0845243	-10.7041	9.7419e-27	3.08664e-25
Ndnf	426.377	-0.904048	0.184554	-4.89854	9.65491e-07	3.70619e-06
Gcnt4	47.7524	-0.904044	0.22177	-4.0765	4.57194e-05	0.000140088
Lifr	6899.39	-0.903726	0.164754	-5.48532	4.12723e-08	1.90075e-07
Mex3d	340.49	-0.903273	0.110808	-8.15168	3.58904e-16	4.18138e-15
Exoc3l4	275.345	-0.902054	0.121175	-7.4442	9.75353e-14	8.58937e-13
Pomt2	607.776	-0.901992	0.064016	-14.0901	4.37027e-45	8.39867e-43
Ppp1r18os	17.9304	-0.900108	0.243288	-3.69976	0.000215801	0.000600802
Ripk1	987.596	-0.899957	0.0712141	-12.6373	1.31444e-36	1.07685e-34
Gk5	124.427	-0.899888	0.122837	-7.32588	2.37344e-13	2.00679e-12
Ttc37	942.135	-0.899396	0.0848031	-10.6057	2.80362e-26	8.47525e-25
B3glct	336.231	-0.898713	0.089398	-10.053	8.91564e-24	2.15179e-22
Zcchc14	2074.96	-0.898547	0.0704399	-12.7562	2.8783e-37	2.5959e-35
Creb3	746.548	-0.898265	0.0943876	-9.51676	1.78659e-21	3.49883e-20
Gngt2	164.874	-0.89802	0.133111	-6.7464	1.51556e-11	1.03951e-10
Efhd2	1093.66	-0.897915	0.102316	-8.77593	1.6949e-18	2.47706e-17
Adra2a	100.056	-0.897083	0.196148	-4.57351	4.7962e-06	1.677e-05
Armcx3	206.622	-0.896359	0.0975046	-9.19299	3.82084e-20	6.70375e-19
Vdr	970.099	-0.896257	0.198001	-4.52653	5.9961e-06	2.06806e-05
C730036E19Rik	10.2665	-0.89621	0.361859	-2.47668	0.013261	0.0265002
Bet1	339.548	-0.896205	0.097937	-9.15083	5.65001e-20	9.72227e-19
Bet1l	444.772	-0.895766	0.0787703	-11.3719	5.77311e-30	2.51509e-28
Mxra8	2864.72	-0.894595	0.133732	-6.68947	2.23984e-11	1.51109e-10
Sgsh	347.674	-0.894109	0.103229	-8.6614	4.66015e-18	6.52771e-17
Rab26os	41.0285	-0.894088	0.217401	-4.11261	3.91203e-05	0.00012086
Tmem214	1236.33	-0.8936	0.060147	-14.8569	6.27305e-50	1.95443e-47
Phc2	1374.74	-0.89358	0.0846635	-10.5545	4.84293e-26	1.43909e-24
Sumf1	569.218	-0.893299	0.0755303	-11.827	2.82978e-32	1.58552e-30
Actg1	3012.68	-0.893223	0.113024	-7.90295	2.72388e-15	2.91269e-14
Nfatc1	2024.26	-0.893152	0.12128	-7.36437	1.77987e-13	1.52498e-12
Tes	371.856	-0.893136	0.106789	-8.36359	6.08391e-17	7.60507e-16
Mrpl52	530.71	-0.892956	0.127174	-7.02155	2.19415e-12	1.66059e-11
Shc1	1333.86	-0.892699	0.0687288	-12.9887	1.41788e-38	1.47999e-36
Gnpnat1	126.01	-0.892625	0.133929	-6.66489	2.64858e-11	1.77115e-10
Ephb3	428.443	-0.892525	0.18353	-4.86311	1.15554e-06	4.38403e-06
Tpk1	82.7071	-0.892429	0.12723	-7.01432	2.31072e-12	1.74049e-11
Cyth4	1307.92	-0.891824	0.132578	-6.72678	1.73455e-11	1.18027e-10
Tgif1	379.136	-0.891601	0.0927577	-9.61215	7.105e-22	1.43376e-20
Ufsp2	589.81	-0.891194	0.0773052	-11.5283	9.5053e-31	4.54552e-29
Plod3	2384.15	-0.890858	0.0943465	-9.44241	3.64305e-21	6.94273e-20
Aprt	828.49	-0.890692	0.129068	-6.90095	5.16545e-12	3.74928e-11
Adcy1	102.895	-0.890614	0.189126	-4.70909	2.48822e-06	9.02544e-06
Arfgap1	1629.81	-0.889962	0.0643754	-13.8246	1.81216e-43	3.05438e-41
Zdhhc9	518.9	-0.889397	0.0995173	-8.93711	3.99482e-19	6.24206e-18
Iffo2	681.274	-0.888506	0.102771	-8.64552	5.35625e-18	7.44193e-17
Tmem241	128.128	-0.888073	0.128888	-6.8903	5.56763e-12	4.01146e-11
Folr2	113.887	-0.887283	0.198775	-4.46375	8.05394e-06	2.7239e-05
1110038B12Rik	186.6	-0.887107	0.116611	-7.60742	2.79613e-14	2.64962e-13
Ctsc	1819.16	-0.887026	0.137542	-6.44914	1.12485e-10	6.98591e-10
Nckap5l	368.813	-0.88682	0.142158	-6.23827	4.42432e-10	2.57289e-09
Rps28	1246.6	-0.886517	0.175477	-5.05204	4.37117e-07	1.75708e-06
Chaf1b	240.598	-0.886306	0.14624	-6.06063	1.35586e-09	7.4767e-09
Cdk15	11.7044	-0.886118	0.326717	-2.71219	0.00668402	0.0142163
Dpm3	270.441	-0.885854	0.17218	-5.14494	2.67605e-07	1.10697e-06
Wdr86	69.3963	-0.885167	0.293588	-3.01499	0.00256984	0.00590893
Itpr3	865.306	-0.88378	0.123933	-7.13113	9.95482e-13	7.80705e-12
Snord12	10.0327	-0.883679	0.337303	-2.61984	0.0087971	0.0182611
Pop4	279.807	-0.883655	0.0772656	-11.4366	2.74438e-30	1.24576e-28
Nostrin	51.1776	-0.883596	0.157473	-5.61111	2.01031e-08	9.61574e-08
Fchsd2	603.668	-0.882745	0.107989	-8.17438	2.97393e-16	3.48649e-15
Ncs1	375.948	-0.881967	0.124171	-7.10287	1.22195e-12	9.48187e-12
Lrfn4	470.078	-0.88176	0.105105	-8.38932	4.88955e-17	6.1797e-16
Klhl25	554.054	-0.881647	0.108307	-8.14028	3.94366e-16	4.57639e-15
Gnb1l	85.407	-0.87983	0.102785	-8.55991	1.12956e-17	1.52709e-16
Tnip3	13.0253	-0.879795	0.348246	-2.52636	0.0115251	0.023342
Mpzl1	475.401	-0.87934	0.13473	-6.52667	6.72476e-11	4.29445e-10
Hhat	161.364	-0.878211	0.216201	-4.06201	4.86529e-05	0.000148721
Gng11	485.24	-0.87751	0.155309	-5.65011	1.60344e-08	7.77449e-08
Ap2s1	1185.05	-0.877364	0.105979	-8.27869	1.24539e-16	1.51086e-15
N4bp3	256.497	-0.877225	0.104239	-8.41548	3.91287e-17	4.99444e-16
Rps12	1506.5	-0.876477	0.144409	-6.0694	1.28391e-09	7.10276e-09
Prkra	231.59	-0.87638	0.104302	-8.40232	4.37724e-17	5.5527e-16
Fam91a1	1541	-0.875573	0.100421	-8.71903	2.80583e-18	4.02065e-17
Zfand2a	611.781	-0.875488	0.0843158	-10.3834	2.94974e-25	8.07663e-24
Commd6	133.911	-0.874986	0.117603	-7.44018	1.00545e-13	8.83549e-13
Kctd11	523.939	-0.874893	0.10878	-8.04275	8.7842e-16	9.82216e-15
Yes1	492.169	-0.874656	0.112371	-7.78365	7.04629e-15	7.19428e-14
Rac3	101.556	-0.874437	0.133605	-6.54496	5.95123e-11	3.83501e-10
Col19a1	53.4758	-0.874385	0.372679	-2.34621	0.0189653	0.0364845
Il2rg	289.33	-0.873758	0.117184	-7.45631	8.89791e-14	7.87296e-13
Dmp1	9240.76	-0.873716	0.231353	-3.77655	0.000159019	0.00045277
Chst14	229.382	-0.87362	0.0936158	-9.33197	1.0392e-20	1.91479e-19
Snord104	58.2228	-0.873617	0.203524	-4.29246	1.76705e-05	5.7078e-05
Cavin3	906.043	-0.872351	0.142915	-6.10399	1.03453e-09	5.78069e-09
Aif1	128.228	-0.872329	0.172454	-5.05832	4.2297e-07	1.70439e-06
Zfp334	318.793	-0.872244	0.0878005	-9.93439	2.94988e-23	6.77747e-22
Vps29	350.329	-0.87164	0.0919261	-9.48196	2.49544e-21	4.81368e-20
Wdr45b	696.79	-0.871142	0.0658067	-13.2379	5.30204e-40	6.52849e-38
Slc25a10	549.078	-0.869834	0.114212	-7.61595	2.61758e-14	2.48616e-13
Gtf2e2	408.483	-0.869241	0.106068	-8.1951	2.50389e-16	2.96075e-15
Azin2	133.572	-0.867401	0.132021	-6.57017	5.02589e-11	3.25914e-10
Fut4	170.742	-0.867385	0.11809	-7.34512	2.05577e-13	1.75042e-12
Clip2	1052.02	-0.867209	0.106556	-8.13856	3.99996e-16	4.63648e-15
Ampd2	1021.19	-0.866897	0.105641	-8.20603	2.2863e-16	2.71439e-15
Uggt2	367.565	-0.866883	0.0892156	-9.71671	2.55905e-22	5.41375e-21
Cdh24	76.9914	-0.866473	0.19023	-4.55486	5.24203e-06	1.82482e-05
Pmepa1	1658.53	-0.866416	0.119973	-7.22173	5.13303e-13	4.16866e-12
Stam2	611.342	-0.866102	0.0660805	-13.1068	3.01188e-39	3.38433e-37
Sh3bp4	380.68	-0.865957	0.145805	-5.93913	2.86532e-09	1.51698e-08
Ptrh1	69.7941	-0.865503	0.14975	-5.77967	7.48491e-09	3.76589e-08
Sec23a	2553.99	-0.865227	0.110026	-7.86382	3.7259e-15	3.927e-14
Plxna1	2245.81	-0.864526	0.106564	-8.11275	4.94859e-16	5.67212e-15
Pdgfb	947.445	-0.864241	0.0867211	-9.96574	2.1526e-23	5.00724e-22
Abitram	228.529	-0.863916	0.122185	-7.07055	1.54317e-12	1.18669e-11
B9d1	71.5003	-0.863378	0.160541	-5.37792	7.53512e-08	3.36251e-07
Cd300c2	183.288	-0.863031	0.193469	-4.46081	8.165e-06	2.75783e-05
Fzd3	205.099	-0.862681	0.113556	-7.59695	3.03194e-14	2.85728e-13
Tm9sf3	5336.09	-0.862369	0.0760542	-11.3389	8.42249e-30	3.60066e-28
Ankrd6	218.932	-0.862332	0.114095	-7.55804	4.09178e-14	3.79177e-13
Pik3c2a	1253.34	-0.861924	0.0896755	-9.61159	7.14401e-22	1.44022e-20
Cd2ap	1151.74	-0.861858	0.0919533	-9.37278	7.06479e-21	1.31827e-19
Liph	11.3162	-0.861706	0.309956	-2.78009	0.00543443	0.0117741
Chpf2	1957.66	-0.861642	0.0794864	-10.8401	2.22169e-27	7.38039e-26
Pgam1	273.103	-0.860821	0.131816	-6.53046	6.55673e-11	4.19888e-10
Sra1	716.929	-0.860348	0.107446	-8.00729	1.1726e-15	1.29635e-14
Gm20367	37.0115	-0.860263	0.275424	-3.12342	0.00178765	0.00423155
Lgr4	1073.86	-0.860243	0.102429	-8.39843	4.52479e-17	5.7328e-16
Il10rb	615.99	-0.860165	0.109244	-7.87378	3.44088e-15	3.63218e-14
Gm4924	21.7129	-0.859955	0.193422	-4.44601	8.748e-06	2.94122e-05
St6gal1	578.501	-0.859758	0.109956	-7.81911	5.31987e-15	5.5193e-14
S100a13	275.211	-0.85969	0.165912	-5.18161	2.19979e-07	9.21268e-07
Klhl5	697.79	-0.859672	0.0848588	-10.1306	4.0406e-24	9.98725e-23
Ndrg4	584.377	-0.859404	0.182981	-4.69667	2.64433e-06	9.56302e-06
Impdh1	954.689	-0.859403	0.100149	-8.58123	9.38606e-18	1.27649e-16
Hid1	167.779	-0.8594	0.151812	-5.66096	1.50524e-08	7.326e-08
Sall2	301.811	-0.859075	0.103652	-8.28807	1.15102e-16	1.40133e-15
Spef1	141.735	-0.859034	0.106807	-8.0429	8.77399e-16	9.81608e-15
Clptm1l	1943.96	-0.85893	0.0746335	-11.5086	1.19333e-30	5.64104e-29
Nr2f6	765.502	-0.858771	0.101448	-8.46514	2.55848e-17	3.32344e-16
Msmo1	260.632	-0.858414	0.205081	-4.18573	2.84247e-05	8.94138e-05
Sdcbp	3199.51	-0.858164	0.103666	-8.27817	1.25079e-16	1.51651e-15
Lca5	108.525	-0.857924	0.113526	-7.55708	4.12211e-14	3.81643e-13
Hspa5	11147.7	-0.857847	0.114968	-7.46159	8.54814e-14	7.58306e-13
Tro	196.725	-0.857509	0.184064	-4.65875	3.18137e-06	1.13851e-05
Pafah1b2	1384.5	-0.857454	0.0814849	-10.5229	6.77891e-26	1.98531e-24
Vgll3	158.538	-0.857165	0.202608	-4.23066	2.33008e-05	7.4032e-05
Snx2	894.247	-0.857139	0.081333	-10.5386	5.73246e-26	1.68878e-24
Spcs1	700.268	-0.857068	0.0994603	-8.61719	6.86147e-18	9.45026e-17
Vipas39	521.936	-0.856457	0.0653223	-13.1113	2.83854e-39	3.20708e-37
Aagab	678.236	-0.856307	0.0580358	-14.7548	2.86477e-49	8.06963e-47
Nme4	101.566	-0.855969	0.133242	-6.42416	1.32596e-10	8.20021e-10
Gm16386	15.3912	-0.855803	0.22876	-3.74106	0.000183246	0.000516744
Dnajc25	354.367	-0.855716	0.0877834	-9.74804	1.8807e-22	4.02842e-21
Sgsm3	397.621	-0.855032	0.0716457	-11.9342	7.85353e-33	4.57485e-31
Tmod3	1597.55	-0.854855	0.0704899	-12.1273	7.5663e-34	4.90807e-32
Wfdc17	134.629	-0.854244	0.265966	-3.21186	0.00131881	0.00320173
Fbxo25	253.186	-0.853995	0.0922053	-9.26188	2.00855e-20	3.6198e-19
Alyref2	96.7673	-0.853377	0.119569	-7.13709	9.53276e-13	7.5018e-12
Stx1a	105.563	-0.853233	0.180479	-4.72761	2.27177e-06	8.27242e-06
Arfip1	787.744	-0.853136	0.0976272	-8.73872	2.35776e-18	3.40229e-17
Abhd17c	314.847	-0.852471	0.0836367	-10.1925	2.14082e-24	5.44824e-23
Zfp260	1005.68	-0.851591	0.105199	-8.09501	5.7259e-16	6.51587e-15
Selenoh	306.829	-0.851165	0.153583	-5.54204	2.98969e-08	1.39943e-07
Gorab	189.262	-0.851016	0.100167	-8.49593	1.9636e-17	2.57674e-16
Qsox2	292.267	-0.850637	0.0965352	-8.81169	1.23278e-18	1.81719e-17
Gm5566	14.357	-0.850373	0.281331	-3.02267	0.00250552	0.00577266
2200002D01Rik	38.4432	-0.850181	0.194446	-4.37232	1.22935e-05	4.0527e-05
Fam171a1	782.717	-0.849982	0.118614	-7.16593	7.72593e-13	6.15451e-12
Coro1b	1504.15	-0.849859	0.0929574	-9.14245	6.10506e-20	1.04703e-18
Thg1l	124.892	-0.849198	0.127728	-6.64848	2.96132e-11	1.96621e-10
Rps4x	778.033	-0.84912	0.124414	-6.82498	8.7937e-12	6.18416e-11
Wasf1	17.2683	-0.848742	0.229371	-3.70029	0.00021535	0.000599708
1110020C17Rik	21.0725	-0.84871	0.214166	-3.96286	7.40564e-05	0.000220635
Vstm2b	12.0873	-0.848317	0.350395	-2.42103	0.0154766	0.0303814
Heph	179.096	-0.847965	0.179679	-4.71933	2.36621e-06	8.59503e-06
Gm17762	14.9296	-0.847643	0.242279	-3.49862	0.000467676	0.00123119
Rpl38	764.08	-0.847474	0.183685	-4.61373	3.95502e-06	1.39689e-05
Dusp6	1119.31	-0.847278	0.0914986	-9.26	2.04429e-20	3.67775e-19
Spsb1	741.801	-0.847223	0.160264	-5.28643	1.24728e-07	5.40981e-07
Cnpy4	429.044	-0.846936	0.119053	-7.11397	1.12753e-12	8.80571e-12
Pbdc1	365.018	-0.846534	0.0754286	-11.223	3.14501e-29	1.2631e-27
Cyp2r1	23.0223	-0.846252	0.228318	-3.70646	0.000210175	0.000586966
Ifitm2	1386.4	-0.845802	0.134771	-6.27584	3.47754e-10	2.05249e-09
Ptpn1	1989.9	-0.843916	0.0968066	-8.71754	2.84308e-18	4.07119e-17
Dpy19l1	1292.24	-0.843831	0.101072	-8.34885	6.89308e-17	8.56968e-16
Tctn2	90.965	-0.843673	0.120178	-7.0202	2.21544e-12	1.67609e-11
Lgals1	6433.12	-0.843506	0.18777	-4.49223	7.04808e-06	2.40507e-05
Pgbd5	138.732	-0.843147	0.249432	-3.38027	0.000724156	0.00184498
Ly96	32.3472	-0.842953	0.185742	-4.53829	5.67119e-06	1.96291e-05
Mcoln2	68.7697	-0.842553	0.173634	-4.85247	1.21934e-06	4.61332e-06
Il33	226.343	-0.842416	0.265647	-3.17118	0.00151821	0.00364153
Homer3	262.154	-0.84231	0.108488	-7.76407	8.22473e-15	8.31899e-14
Ap3m1	686.97	-0.842207	0.0808134	-10.4216	1.97542e-25	5.52662e-24
Ndfip1	1015.11	-0.842176	0.101573	-8.29131	1.1201e-16	1.3653e-15
F2r	888.441	-0.841793	0.136631	-6.16107	7.22563e-10	4.10217e-09
Kcnmb4	16.5322	-0.841183	0.24143	-3.48417	0.00049367	0.0012958
Mthfd2	511.065	-0.841177	0.124345	-6.76486	1.33441e-11	9.21715e-11
Chn1os3	19.5057	-0.840946	0.262258	-3.20656	0.00134331	0.00325621
Sh3bp2	645.428	-0.840844	0.110175	-7.63191	2.31301e-14	2.21015e-13
Mras	552.761	-0.840424	0.0993921	-8.45564	2.77557e-17	3.59409e-16
Ngf	203.355	-0.840334	0.222463	-3.77741	0.000158465	0.000451255
Dlx3	330.58	-0.839281	0.246817	-3.40043	0.00067281	0.00172463
Tex264	687.961	-0.838769	0.0840565	-9.97863	1.89055e-23	4.41264e-22
Cdk7	735.871	-0.838583	0.0689793	-12.157	5.26409e-34	3.45832e-32
H2af-ps2	34.6966	-0.83845	0.190556	-4.40003	1.08238e-05	3.5933e-05
Pwwp3b	122.615	-0.838081	0.172176	-4.86759	1.12965e-06	4.29214e-06
Cfl1	5360.84	-0.838073	0.116908	-7.16867	7.57277e-13	6.0403e-12
Slc25a32	319.218	-0.837894	0.109629	-7.643	2.12213e-14	2.04199e-13
Mapk6	1837.49	-0.837488	0.0818941	-10.2265	1.5092e-24	3.89869e-23
Rbms3	1112.24	-0.8371	0.103964	-8.05185	8.15548e-16	9.13902e-15
Ppt1	1007.38	-0.836806	0.079363	-10.544	5.41286e-26	1.59691e-24
Hsp90b1	9791.78	-0.836361	0.0999682	-8.36628	5.94673e-17	7.44718e-16
Chtf8	1565.44	-0.836315	0.0866654	-9.64992	4.91942e-22	1.01158e-20
Gpc1	7283.53	-0.835958	0.095623	-8.74223	2.28552e-18	3.30036e-17
Pigf	49.007	-0.835627	0.157578	-5.30294	1.13954e-07	4.96872e-07
Hpgds	188.196	-0.835416	0.165419	-5.05031	4.41089e-07	1.77151e-06
Tmco1	696.847	-0.834643	0.0952206	-8.76535	1.86194e-18	2.71539e-17
Myo10	5137.64	-0.833915	0.0902061	-9.24455	2.36235e-20	4.22408e-19
Pdcl	591.3	-0.833263	0.0881777	-9.44981	3.39453e-21	6.49924e-20
Sqle	306.489	-0.833047	0.173387	-4.80456	1.55094e-06	5.77963e-06
Ltbr	1270.43	-0.832871	0.0632447	-13.169	1.32297e-39	1.53696e-37
Stk11ip	558.317	-0.832493	0.0800957	-10.3937	2.64789e-25	7.28898e-24
Rpl7a	620.605	-0.832154	0.129032	-6.44923	1.12422e-10	6.98411e-10
Ostm1	807.401	-0.8318	0.087728	-9.48157	2.50475e-21	4.82711e-20
Txlna	1522.42	-0.831631	0.0612142	-13.5856	4.87599e-42	7.31862e-40
Slc36a2	656.689	-0.831523	0.212691	-3.90953	9.24763e-05	0.000271733
Thbs3	1872.91	-0.831454	0.197651	-4.20667	2.59158e-05	8.19477e-05
Idh1	910.392	-0.8295	0.104912	-7.9066	2.64513e-15	2.83438e-14
Septin9	3012.44	-0.829306	0.0723446	-11.4633	2.01734e-30	9.32191e-29
Agrn	1399.27	-0.82904	0.0942599	-8.79526	1.42714e-18	2.09317e-17
Parva	1446.25	-0.828861	0.0932576	-8.88787	6.22895e-19	9.50191e-18
Ankrd50	572.507	-0.827805	0.115453	-7.17008	7.49557e-13	5.98104e-12
Igf2r	6232.23	-0.827467	0.0957581	-8.64122	5.56155e-18	7.71675e-17
Scarf1	341.619	-0.827157	0.0970292	-8.52482	1.53041e-17	2.03425e-16
Snord43	10.1177	-0.827035	0.33829	-2.44475	0.0144951	0.0286847
Cand1	2052.06	-0.826462	0.0726483	-11.3762	5.49346e-30	2.40345e-28
Lama4	2909.74	-0.825909	0.109484	-7.54368	4.56903e-14	4.20748e-13
Rab2b	203.638	-0.825887	0.0882697	-9.3564	8.24984e-21	1.53106e-19
Fzd5	852.898	-0.825319	0.10548	-7.8244	5.10085e-15	5.31083e-14
Il1rl2	130.972	-0.825249	0.143973	-5.73198	9.92651e-09	4.9316e-08
Lrrc1	305.385	-0.824949	0.112117	-7.35791	1.86816e-13	1.59828e-12
Prkci	599.983	-0.824694	0.0766969	-10.7526	5.75937e-27	1.86504e-25
Ndfip2	431.071	-0.823913	0.0909296	-9.06099	1.29269e-19	2.11974e-18
Slc39a7	3596.25	-0.82359	0.0824798	-9.98535	1.76673e-23	4.13774e-22
Pafah1b3	172.302	-0.822401	0.191524	-4.29398	1.75502e-05	5.67073e-05
Chpf	1686.76	-0.822083	0.140967	-5.83174	5.48536e-09	2.80446e-08
Traf4	381.387	-0.821897	0.123129	-6.67508	2.47104e-11	1.65889e-10
Tmem167	1031.2	-0.821751	0.0800046	-10.2713	9.49126e-25	2.48623e-23
Smim15	517.882	-0.820669	0.0914726	-8.97174	2.91854e-19	4.62357e-18
Sec11a	657.948	-0.820372	0.0961214	-8.53474	1.40466e-17	1.8768e-16
Gatd1	331.841	-0.820341	0.0825129	-9.94198	2.73345e-23	6.30839e-22
Zfp442	43.2532	-0.820257	0.187888	-4.36566	1.26739e-05	4.16715e-05
Asic3	109.854	-0.820201	0.200008	-4.10083	4.11664e-05	0.000126836
Ext2	1077.58	-0.819563	0.0792306	-10.344	4.45457e-25	1.19426e-23
Faf2	999.228	-0.819456	0.0641675	-12.7706	2.39368e-37	2.21717e-35
Ift74	149.802	-0.818931	0.096982	-8.44415	3.06256e-17	3.95077e-16
Ttc21b	266.426	-0.818724	0.110175	-7.43115	1.07659e-13	9.42444e-13
Plod2	4841.95	-0.818607	0.231741	-3.53242	0.000411771	0.00109396
Wdr61	356.834	-0.81845	0.108597	-7.53662	4.82321e-14	4.42569e-13
Rnf19b	1713.23	-0.81768	0.0974181	-8.39352	4.71809e-17	5.97402e-16
Dad1	1286.65	-0.817173	0.103698	-7.88029	3.2663e-15	3.45677e-14
Ltc4s	40.4215	-0.817137	0.226554	-3.60682	0.000309975	0.000839459
Shroom1	85.9626	-0.816986	0.158391	-5.15803	2.49557e-07	1.03859e-06
Slc38a2	4688.9	-0.816942	0.091652	-8.91352	4.94354e-19	7.64891e-18
Spns2	1388.8	-0.81649	0.122282	-6.67711	2.43699e-11	1.63818e-10
Sar1a	3559.02	-0.816303	0.0910774	-8.96274	3.16713e-19	5.00967e-18
Btg3	84.8644	-0.816303	0.130925	-6.23489	4.52106e-10	2.62463e-09
Gm6548	533.012	-0.81614	0.126272	-6.46335	1.02408e-10	6.39094e-10
Plxna2	1956.23	-0.81518	0.167952	-4.85365	1.21212e-06	4.58767e-06
Pi4k2a	555.369	-0.815174	0.0577568	-14.1139	3.11842e-45	6.10705e-43
Rnf4	1476.39	-0.814731	0.0752426	-10.8281	2.53464e-27	8.36595e-26
Xkr4	19.3908	-0.814521	0.25206	-3.23146	0.00123159	0.00300766
Kctd12b	288.877	-0.814474	0.14876	-5.4751	4.3726e-08	2.00477e-07
Dancr	56.9647	-0.814199	0.136825	-5.95065	2.67076e-09	1.41946e-08
Ermp1	1080.3	-0.81369	0.0879473	-9.25202	2.20284e-20	3.94918e-19
Cdkn1a	1437.84	-0.813668	0.215879	-3.76909	0.000163841	0.000465469
Gm6194	24.1376	-0.813567	0.219058	-3.71393	0.000204064	0.000570829
Dusp12	206.488	-0.813371	0.0791191	-10.2803	8.64234e-25	2.26964e-23
Nynrin	807.23	-0.813101	0.111	-7.32526	2.38439e-13	2.01521e-12
Manf	1268.82	-0.813059	0.124364	-6.53773	6.24584e-11	4.01605e-10
Rps23	567.363	-0.813005	0.143962	-5.64735	1.62941e-08	7.89295e-08
Emilin3	104.581	-0.812807	0.210366	-3.86377	0.000111648	0.000324177
Ccdc8	374.782	-0.812249	0.134436	-6.04188	1.52328e-09	8.34839e-09
Nr4a2	363.843	-0.811927	0.199166	-4.07663	4.56923e-05	0.000140026
Slc9a5	214.628	-0.811392	0.139257	-5.82659	5.65712e-09	2.88869e-08
Nectin2	216.978	-0.81119	0.117759	-6.88854	5.6366e-12	4.05973e-11
Acy1	135.044	-0.810753	0.109823	-7.38239	1.55474e-13	1.33878e-12
Rhbdl2	130.226	-0.810262	0.162847	-4.9756	6.50444e-07	2.55055e-06
Pqlc3	420.04	-0.809872	0.0977746	-8.28305	1.2006e-16	1.45823e-15
Ldb2	214.1	-0.809732	0.151624	-5.34041	9.27343e-08	4.08591e-07
Gm11478	546.329	-0.809634	0.125466	-6.45304	1.0963e-10	6.81886e-10
Fuca1	956.866	-0.809014	0.077797	-10.399	2.50477e-25	6.93211e-24
Trpm6	67.813	-0.808866	0.242932	-3.32959	0.000869726	0.00218259
Gm10638	28.2565	-0.808801	0.195888	-4.12889	3.64513e-05	0.00011302
Ier3ip1	486.472	-0.808749	0.0970388	-8.33429	7.79674e-17	9.65228e-16
Ptbp1	2799.62	-0.808562	0.103064	-7.84522	4.32207e-15	4.51829e-14
Ggh	234.885	-0.808522	0.129147	-6.26047	3.83821e-10	2.25372e-09
Ormdl3	1223.56	-0.808295	0.0695383	-11.6237	3.12205e-31	1.60497e-29
Ddost	3017.97	-0.807792	0.0910298	-8.87392	7.0613e-19	1.06766e-17
Hdlbp	11144.7	-0.807767	0.0655361	-12.3255	6.6002e-35	4.63208e-33
Gm21399	172.02	-0.807703	0.163855	-4.92936	8.24984e-07	3.19837e-06
Acap2	2101.44	-0.807118	0.102077	-7.90694	2.63794e-15	2.82816e-14
Get1	303.462	-0.806638	0.117972	-6.83752	8.0578e-12	5.69586e-11
Snn	532.884	-0.806618	0.125305	-6.43724	1.21663e-10	7.54224e-10
Fam110b	150.487	-0.806586	0.107529	-7.50108	6.32942e-14	5.72348e-13
Tnfrsf10b	107.242	-0.806544	0.14641	-5.50879	3.61303e-08	1.67595e-07
Cnn2	3801.67	-0.806366	0.109797	-7.34417	2.07045e-13	1.76219e-12
Eid1	1260.07	-0.805608	0.0945869	-8.51712	1.63576e-17	2.16728e-16
Dtx4	878.376	-0.805525	0.145142	-5.5499	2.85835e-08	1.34223e-07
Pelo	193.892	-0.805281	0.0874372	-9.20982	3.26664e-20	5.77574e-19
Rdh10	257.905	-0.805255	0.110482	-7.28855	3.13314e-13	2.60311e-12
Cadm1	1194.6	-0.804072	0.152219	-5.28235	1.2754e-07	5.52361e-07
Zcwpw1	48.3694	-0.802994	0.14492	-5.54094	3.00855e-08	1.40794e-07
Cdc42ep1	775.192	-0.802974	0.102373	-7.84364	4.37676e-15	4.57313e-14
Col8a1	7022.67	-0.802563	0.20803	-3.85792	0.000114356	0.000331619
Gm19412	10.6306	-0.802369	0.267076	-3.00427	0.00266218	0.00610692
Clta	2237.58	-0.802198	0.094761	-8.46549	2.55083e-17	3.31623e-16
Eno1b	56.475	-0.801688	0.192937	-4.15519	3.25018e-05	0.000101494
Gnai3	1990.22	-0.801672	0.0927074	-8.64734	5.27157e-18	7.32923e-17
Alg14	182.542	-0.801432	0.0936516	-8.55759	1.1525e-17	1.55708e-16
Ranbp1	1037.95	-0.801154	0.104033	-7.70093	1.35083e-14	1.33544e-13
Btd	354.933	-0.801131	0.0828061	-9.67478	3.85928e-22	8.04036e-21
Slc22a17	319.179	-0.800666	0.13487	-5.93657	2.91042e-09	1.53808e-08
Sox18	433.795	-0.800056	0.120384	-6.64587	3.01424e-11	1.99877e-10

## Sheet: Fig. 1E
p21Cip1						p21Cip1
0.2	1	3	7	14		Tukey's multiple comparisons test	Mean Diff.	95.00% CI of diff.	Below threshold?	Summary	Adjusted P Value			For the comparison to baseline, please see res_intactsvs4hr ...
1.16523	1.08134	1.02241	1.12106	1.11631		0.2 vs. 1	0.0957	0.05330 to 0.1381	Yes	****	<0.0001	A-B
1.17658	1.10871	1.08722	1.06455	1.10083		0.2 vs. 3	0.1171	0.07467 to 0.1595	Yes	****	<0.0001	A-C
1.22263	1.07673	1.092	1.10676	1.08354		0.2 vs. 7	0.07394	0.03154 to 0.1163	Yes	***	0.0004	A-D
1.16758	1.10083	1.06462	1.13214	1.08811		0.2 vs. 14	0.08394	0.04154 to 0.1263	Yes	****	<0.0001	A-E
1.17647	1.06239	1.05687	1.11429	1.10001		1 vs. 3	0.02138	-0.02102 to 0.06378	No	ns	0.569	B-C
						1 vs. 7	-0.02176	-0.06416 to 0.02064	No	ns	0.5527	B-D
p16Ink4a						1 vs. 14	-0.01176	-0.05416 to 0.03064	No	ns	0.9181	B-E
0.912861	1.12027	1.55129	1.80487	1.90782		3 vs. 7	-0.04314	-0.08554 to -0.0007358	Yes	*	0.0449	C-D
1.01176	1.0513	1.48178	1.97758	1.7754		3 vs. 14	-0.03314	-0.07554 to 0.009264	No	ns	0.174	C-E
0.912768	1.12049	1.56214	1.92432	1.59258		7 vs. 14	0.01	-0.03240 to 0.05240	No	ns	0.9528	D-E
1.12053	1.15057	1.48114	1.70148	1.59263
0.542026	1.31266	1.61066	1.84353	1.9425		p16Ink4a
						0.2 vs. 1	-0.2511	-0.5178 to 0.01568	No	ns	0.0713	A-B
Mki67						0.2 vs. 3	-0.6374	-0.9042 to -0.3707	Yes	****	<0.0001	A-C
1.14783	0.998354	1.0003	0.881079	0.897944		0.2 vs. 7	-0.9504	-1.217 to -0.6836	Yes	****	<0.0001	A-D
1.13992	1.04583	0.977911	0.885377	0.898238		0.2 vs. 14	-0.8622	-1.129 to -0.5954	Yes	****	<0.0001	A-E
1.10463	1.02336	0.971883	0.935893	0.914797		1 vs. 3	-0.3863	-0.6531 to -0.1196	Yes	**	0.0027	B-C
1.04812	0.980793	0.984648	0.918031	0.902466		1 vs. 7	-0.6993	-0.9661 to -0.4326	Yes	****	<0.0001	B-D
1.14375	1.03035	0.970718	0.882985	0.928049		1 vs. 14	-0.6111	-0.8779 to -0.3444	Yes	****	<0.0001	B-E
						3 vs. 7	-0.313	-0.5797 to -0.04620	Yes	*	0.0167	C-D
						3 vs. 14	-0.2248	-0.4915 to 0.04197	No	ns	0.1253	C-E
						7 vs. 14	0.08817	-0.1786 to 0.3549	No	ns	0.8571	D-E
						Mki67
						0.2 vs. 1	0.1011	0.05191 to 0.1503	Yes	****	<0.0001	A-B
						0.2 vs. 3	0.1358	0.08655 to 0.1850	Yes	****	<0.0001	A-C
						0.2 vs. 7	0.2162	0.1670 to 0.2654	Yes	****	<0.0001	A-D
						0.2 vs. 14	0.2086	0.1593 to 0.2578	Yes	****	<0.0001	A-E
						1 vs. 3	0.03464	-0.01456 to 0.08385	No	ns	0.2558	B-C
						1 vs. 7	0.1151	0.06586 to 0.1643	Yes	****	<0.0001	B-D
						1 vs. 14	0.1074	0.05823 to 0.1566	Yes	****	<0.0001	B-E
						3 vs. 7	0.08042	0.03121 to 0.1296	Yes	***	0.0008	C-D
						3 vs. 14	0.07279	0.02359 to 0.1220	Yes	**	0.0022	C-E
						7 vs. 14	-0.007626	-0.05683 to 0.04158	No	ns	0.9898	D-E
