# Supplementary material for: Modulation of fracture healing by the transient accumulation of senescent cells
Source: eLife. 2021 Oct 7;10:e69958. doi: 10.7554/eLife.69958 (PMC8526061; doi:10.7554/eLife.69958)
Supplement: Figure 2—source data 1. [file elife-69958-fig2-data1.xlsx]

## Sheet: Fig. 2B
p21Cip1		Control			Treated
	Days	Mean	SD	N	Mean	SD	N		P value	Mean of Control	Mean of Treated	Difference	SE of difference	t ratio	df	q value	q value
4	4	1	0.126071	6	8	1.38748	6		4	Yes	<0.000001	1	8	-7	0.5688	12.31	10	<0.000001
8	8	1	0.111754	6	23	2.68752	6		8	Yes	<0.000001	1	23	-22	1.098	20.03	10	<0.000001
14	14	1	0.076334	6	21	1.81266	6		14	Yes	<0.000001	1	21	-20	0.7407	27	10	<0.000001
28	28	1	0.084761	6	3	0.693295	6		28	Yes	3.7e-05	1	3	-2	0.2851	7.014	10	3.7e-05
p16Ink4a		Control			Treated
	Days	Mean	SD	N	Mean	SD	N			P value	Mean of Control	Mean of Treated	Difference	SE of difference	t ratio	df	q value
4	4	1	0.170096	6	10.1245	1.57347	6		4	Yes	0.002959	1	10.12	-9.125	2.883	3.165	40	0.000996
8	8	1	0.688941	6	5.43114	0.749983	6		8	No	0.132117	1	5.431	-4.431	2.883	1.537	40	0.03336
14	14	1	0.130117	6	106.732	12.6372	6		14	Yes	<0.000001	1	106.7	-105.7	2.883	36.68	40	<0.000001
28	28	1	0.301027	6	27.6197	6.00649	6		28	Yes	<0.000001	1	27.62	-26.62	2.883	9.235	40	<0.000001

## Sheet: Fig. 2D
upper part (SADS %)			Table Analyzed	Col: Entering replicate data
Contra	Fx
4	24		Column B	Fx
6	30		vs.	vs.
2	34		Column A	Contra
4	14
2	42		Unpaired t test
4	30		P value	<0.0001
8	42		P value summary	****
4	28		Significantly different (P < 0.05)?	Yes
4	30		One- or two-tailed P value?	Two-tailed
4	40		t, df	t=8.171, df=30
12	24
6	44		How big is the difference?
4	16		Mean of column A	4.75
2	12		Mean of column B	27.63
6	20		Difference between means (B - A) ± SEM	22.88 ± 2.799
4	12		95% confidence interval	17.16 to 28.59
			R squared (eta squared)	0.69
			F test to compare variances
			F, DFn, Dfd	18.80, 15, 15
			P value	<0.0001
			P value summary	****
			Significantly different (P < 0.05)?	Yes
lower part (SADS number)
		Control			Treated
	Days	Mean	SD	N	Mean	SD	N		Days	P value	Mean of Control	Mean of Treated	Difference	SE of difference	t ratio	df	q value
4	4	2	0.70711	4	12.8	3.77	4		4	0.001342	2	12.8	-10.8	1.918	5.631	6	0.001355
8	8	2.25	1.08972	4	17.8	3.27	4		8	0.000104	2.25	17.8	-15.55	1.723	9.023	6	0.000419
14	14	3.25	1.63936	4	17.3	3.96	4		14	0.000603	3.25	17.3	-14.05	2.143	6.556	6	0.001194
28	28	2	0.70711	4	7.5	1.66	4		28	0.000887	2	7.5	-5.5	0.9022	6.096	6	0.001194

## Sheet: Fig. 2F
upper-left (TAF+ cells (day 14))			Table Analyzed	Col: Entering replicate data
1.36986	34.7222
2.5641	30.5556		Column B	Fx
1.2987	31.3253		vs.	vs.
3.8961	33.3333		Column A	Contra
			Unpaired t test
			P value	<0.0001
			P value summary	****
			Significantly different (P < 0.05)?	Yes
			One- or two-tailed P value?	Two-tailed
			t, df	t=26.77, df=6
			How big is the difference?
			Mean of column A	2.282
			Mean of column B	32.48
			Difference between means (B - A) ± SEM	30.20 ± 1.128
			95% confidence interval	27.44 to 32.96
			R squared (eta squared)	0.9917
			F test to compare variances
			F, DFn, Dfd	2.407, 3, 3
			P value	0.4895
			P value summary	ns
			Significantly different (P < 0.05)?	No
			Data analyzed
			Sample size, column A	4
			Sample size, column B	4
upper-right (TAF time course)		Fracture
	Days	Mean	SD	N
4	4	19.0201	2.25298	4
8	8	26.3301	1.13002	4
14	14	32.4841	1.89671	4
28	28	24.6107	2.40402	4
bottom (TAF per cell %)
	˂1				≥1				≥2				≥3
Contra	70.32	60.1	51.07	38.23	29.68	41.23	48.93	61.77	10.84	17.95	8.89	18.27	1.18	2.72	1.3	3.41
4	24.5	29.53	21.25	55.96	75.5	70.47	78.75	44.04	48.46	28.66	43.04	30.62	19.77	17.79	21.61	17.82
8	19.12	15.95	13.83	13.59	80.88	84.05	86.17	86.41	52.65	52.38	61.29	75.49	25.26	25.71	26.14	27.77
14	20	21.56	20.94	24.62	80	78.44	79.06	75.38	48.13	46.25	55.41	48.67	34.06	30.94	31.35	33.81
28	18.93	43.33	38.01	12.31	81.07	56.67	61.99	87.69	55.89	37.96	40.4	57.98	28.04	22.41	23.86	25.3
