# Supplementary material for: Modulation of fracture healing by the transient accumulation of senescent cells
Source: eLife. 2021 Oct 7;10:e69958. doi: 10.7554/eLife.69958 (PMC8526061; doi:10.7554/eLife.69958)
Supplement: Figure 3—source data 1. [file elife-69958-fig3-data1.xlsx]

## Sheet: Fig. 3C
Days post fracture	WT							p16Luc
2	29.2	73.5	44.54	47.14	13.97	39.93		197	180	27.63	84.34	94.53	50.91	38.32	32.69
9	343	318	240	99.85	138	47.97		320	573	363	745	2130	266	334	398.3
15	153	285	103	142	79.4	83.25		988	216	1470	1020	953	1500	998	807
18	223	291	429.8	166.1	63.72	73.88		67.7	187	430	834	352	981.1	253	245.1
23	231	234	87.84	94.81	88.79	81.22		262	55.23	301	62.35	21.32	28.79	94.69	2122
	P value	Mean rank of WT	Mean rank of p16Luc	Mean rank diff.	Mann-Whitney U	q value
2	0.228438	5.833	8.75	-2.917	14	0.230723
9	0.007992	4.167	10	-5.833	4	0.016144
15	0.001332	3.667	10.38	-6.708	1	0.005381
18	0.181152	5.667	8.875	-3.208	13	0.230723
23	0.754579	8	7.125	0.875	21	0.6097

## Sheet: Fig. 3D
Days post fracture	WT								L/L
0	0	0	0	0	0	0			0	0	0	0	0	0
7	0	0	0	0	0	0			0	1	0	1	0	0
14	0	2	2	1	0	1			1	2	1	2	1	2
21	2	3	3	2	1	2			3	3	3	4	2	3
28	3	4	3	4	3	2			3	4	4	4	4	4
35	4	4	4	4	3	3			4	4	4	4	4	4
	P value	Mean of WT	Mean of L/L	Difference	SE of difference	t ratio	df	q value
0		0	0	0	0
7	0.144928	0	0.3333	-0.3333	0.2108	1.581	10	0.182971
14	0.269996	1	1.5	-0.5	0.4282	1.168	10	0.272696
21	0.064615	2.167	3	-0.8333	0.4014	2.076	10	0.182971
28	0.085638	3.167	3.833	-0.6667	0.3496	1.907	10	0.182971
35	0.144928	3.667	4	-0.3333	0.2108	1.581	10	0.182971

## Sheet: Fig. 3E
weeks after fracture	WT						L/L
0	0.627317	1.14025	0.597913	0.972127	1.6624	30.1438	0.770227	0.145805	1.66362	1.41083	1.00952	3.89652
1	3.3155	55.7565	5.10964	14.6601	4.85037	104.973	28.8343	34.4113	15.1502	15.9259	6.31153	11.2794
2	85.67	339.171	719.092	548.911	58.4405	464.48	199.767	824.045	230.687	496.217	934.985	62.4574
3	385.566	501.968	942.699	719.621	431.474	661.089	734.396	814.919	446.904	792.358	1002.33	601.954
4	577.303	875.561	905.129	874.157	564.239	704.659	897.477	992.138	701.899	1215.59	771.616	680.613
5	770.404	935.701	826.778	877.594	694.461	841.397	684.498	835.446	985.07	1131.98	1059.59	1190.53
weeks after fracture	P value	Mean of WT	Mean of L/L	Difference	SE of difference	t ratio	df	q value
0	0.96651	5.857	1.483	4.375	103.8	0.04216	60	0.976175
1	0.902289	31.44	18.65	12.79	103.8	0.1233	60	0.976175
2	0.395843	369.3	458	-88.73	103.8	0.8552	60	0.599703
3	0.23276	607.1	732.1	-125.1	103.8	1.205	60	0.470175
4	0.22797	750.2	876.6	-126.4	103.8	1.218	60	0.470175
5	0.135984	824.4	981.2	-156.8	103.8	1.511	60	0.470175

## Sheet: Fig. 3F
WT	p16LUC
49	63
77	84
70	77
63	91
38.5	63
45.5	77
Table Analyzed	Col: Entering replicate data
Column B	p16LUC
vs.	vs.
Column A	WT
Unpaired t test
P value	0.0355
P value summary	*
Significantly different (P < 0.05)?	Yes
One- or two-tailed P value?	Two-tailed
t, df	t=2.429, df=10
How big is the difference?
Mean of column A	57.17
Mean of column B	75.83
Difference between means (B - A) ± SEM	18.67 ± 7.686
95% confidence interval	1.542 to 35.79
R squared (eta squared)	0.371
F test to compare variances
F, DFn, Dfd	1.818, 5, 5
P value	0.5276
P value summary	ns
Significantly different (P < 0.05)?	No
Data analyzed
Sample size, column A	6
Sample size, column B	6

## Sheet: Fig. 3G
WT	p16LUC
3.1256	6.9542
6.8051	10.2306
6.1808	8.3468
6.4439	9.8651
1.6069	8.8462
3.6985	5.7963
Table Analyzed	Col: Entering replicate data
Column B	p16LUC
vs.	vs.
Column A	WT
Unpaired t test
P value	0.0078
P value summary	**
Significantly different (P < 0.05)?	Yes
One- or two-tailed P value?	Two-tailed
t, df	t=3.318, df=10
How big is the difference?
Mean of column A	4.643
Mean of column B	8.34
Difference between means (B - A) ± SEM	3.696 ± 1.114
95% confidence interval	1.214 to 6.179
R squared (eta squared)	0.524
F test to compare variances
F, DFn, Dfd	1.560, 5, 5
P value	0.6374
P value summary	ns
Significantly different (P < 0.05)?	No
Data analyzed
Sample size, column A	6
Sample size, column B	6
