# Supplementary material for: Modulation of fracture healing by the transient accumulation of senescent cells
Source: eLife. 2021 Oct 7;10:e69958. doi: 10.7554/eLife.69958 (PMC8526061; doi:10.7554/eLife.69958)
Supplement: Figure 4—figure supplement 1—source data 1. [file elife-69958-fig4-figsupp1-data1.xlsx]

## Sheet: Figure 4 – figure supplement 1
Ccl8	Cdkn1a	Cdkn2a (p16Ink4a)	Cdkn2a (pan)	Fas	Faslg	Ifng	Igfbp3	Irf1	Pappa	Ccl3	Ccl5	Ccl7	Csf1	Csf2	Csf3	Cxcl1	Cxcl15	Cxcl2	Hmgb1	Icam1	Igfbp2	Igfbp4	Il17a	Il1a	Il1b	Il6	Inhba	Mmp12	Mmp13	Mmp9	Nfkb1	Serpinb2	Serpine1	Tnf	Vcam1	Vegfa	Foxo4	Gata4	Ccl2	Pdgfa	Tp53	Il8	Tgfb1	Tgfbr1	Tgfb2	Tgfb3	Cxcl12	Mif	Sparc
5.4929	9.88436	5.5792	11.0423	1.32131	0.391514	0.168725	2.94647	0.728947	2.16661	0.972154	0.162947	32.7178	3.26975	0.114544	4.33142	14.7485	1.41153	5.0743	1.07047	0.847759	1.17348	1.37153	47.027	0.393945	0.333756	1.12586	3.13163	12.7349	25.412	1.14163	0.757356	0.304206	44.3504	0.382387	0.312963	2.46519	1.00682	0.733734	15.1426	6.35158	1.00398	58.4587	0.996614	2.95949	14.9565	10.6492	0.533996	2.07623	18.0157
4.16378	6.66928	12.5072	12.8446	1.38916	0.447774	0.0562058	3.24322	0.912346	2.22711	1.29321	0.379921	13.2215	2.40734	0.555789	1.6471	7.50782	0.917847	5.57278	0.886244	0.871555	2.72332	1.87621	0.917847	0.422899	1.21747	0.874256	2.13379	13.3004	11.774	1.32873	1.24612	0.355927	39.4594	0.355825	0.484913	1.32708	0.767875	0.421221	13.8239	5.37298	0.883089	0.378795	1.15485	2.29692	7.92139	7.27522	0.98057	1.28361	21.0712
3.29753	3.82434	6.62046	6.32352	1.23805	0.865337	0.170905	1.98382	0.875537	2.0892	0.455843	0.525483	4.60022	1.67337	0.322884	0.999518	2.99276	0.693715	1.76903	1.01218	0.755566	1.17884	1.26112	0.693715	0.598368	1.16741	0.597826	1.74384	12.8415	6.5148	1.04818	0.973785	0.563411	16.8144	0.482643	0.645783	1.28467	0.91792	0.337224	3.76089	3.813	1.09477	4.68417	1.26717	2.38079	7.78176	7.36555	1.17077	1.52052	13.8909
5.81866	12.6246	7.97851	18.6643	1.43692	0.137033	0.389164	4.30972	0.827696	3.24632	1.55929	0.107774	40.0125	3.57265	0.00598027	5.27514	19.7043	2.20352	16.3255	1.29872	1.27711	1.35326	2.09785	2.20352	0.154894	0.712832	11.1234	5.17353	13.5468	17.803	1.00036	1.12244	0.109407	102.79	0.346647	0.419421	4.10613	1.85449	0.810269	19.9578	7.86304	0.82405	0.165909	0.992834	2.86309	18.6212	11.5993	0.366912	2.3454	15.3301
6.0703	10.3105	14.548	14.8415	2.21206	0.433768	0.128952	2.75633	0.913848	2.56517	0.743083	0.217742	52.9748	2.47991	0.365876	1.65783	15.4407	0.820122	4.1016	1.28829	0.801718	1.42828	0.976862	46.428	0.368243	0.702099	1.4334	1.7785	22.0987	10.5755	0.878487	0.988284	0.282914	59.2102	0.431212	0.512777	1.46219	0.988825	0.445405	16.0402	3.8119	1.22511	93.446	1.58773	3.43274	13.8366	11.4674	0.717669	2.71627	19.5089
7.24756	5.1189	13.5136	20.6102	1.37365	0.336674	0.154005	3.80116	0.737321	3.59399	0.859432	0.239378	32.9835	2.43574	0.916143	1.99406	5.70116	1.72054	1.41486	0.936342	1.26336	1.76546	2.73761	21.1333	0.274498	0.425715	0.979558	3.78029	6.10856	14.4072	0.971803	1.1105	0.133701	48.3978	0.423026	0.347998	2.08219	1.13367	0.652706	8.54562	5.60654	0.639003	3.47686	1.56738	3.59565	37.8563	14.9273	0.559726	5.17916	72.5012
4.3855	25.48	6.82065	129.467	1.56158	0.265842	0.00391442	25.056	1.30527	5.34479	1.88837	0.176367	69.2968	4.16024	0.00579346	0.958535	0.517345	0.657178	11.3489	1.50719	0.601527	2.86789	2.82811	6.74764	0.294596	0.477886	11.7516	11.941	28.6035	53.391	2.86353	1.46315	0.234099	77.1089	0.438756	0.997652	5.71999	2.60839	0.374224	33.4688	17.0845	8.96892	100.063	2.00253	5.61615	22.8307	32.9326	0.661413	4.45787	41.1101
30.8572	23.1701	5.79277	124.662	2.04557	0.243563	0.199866	40.4108	1.34791	6.06613	1.68145	0.0871929	53.4172	3.78056	1.71661	0.860299	0.188776	0.733787	8.90389	1.46912	0.801603	2.86191	3.90708	12.1203	0.2079	0.639526	22.9613	9.56868	22.2049	58.2309	4.38245	1.02719	0.0623917	72.8257	0.116634	0.619148	7.07853	3.4944	0.430047	17.8101	22.4061	1.59885	35.1116	1.44688	5.04031	10.059	14.588	1.77641	2.07881	25.1487
2.94475	13.972	6.75435	71.177	0.814051	1.69809	0.361211	7.43293	1.53034	3.03109	1.1827	0.311393	17.9932	4.05485	1.07163	2.81813	0.0378673	0.448115	2.3801	1.51743	0.783794	1.68563	3.36277	0.0878285	0.463348	0.815674	2.70311	3.42074	9.74863	33.7125	4.68623	1.67687	0.130835	18.0278	0.41301	1.44024	4.3892	2.42238	0.29608	10.1893	15.1447	1.91467	0.399506	1.35293	6.36637	17.4219	25.3162	0.880454	5.20711	44.713
17.2256	26.8338	6.97277	119.43	2.81213	0.580102	0.179164	17.0927	1.3975	6.57226	1.19722	0.276719	60.4642	4.54357	0.304615	1.20954	0.20814	0.470173	3.89522	2.9886	1.05904	5.38555	4.9004	27.3147	0.30005	0.939702	29.5856	6.41158	26.8683	44.0666	3.26414	3.13654	0.0568496	98.9617	0.320909	1.212	5.06307	3.973	4.80089	38.7424	19.5609	2.17411	26.9023	1.42073	5.70132	21.5164	32.5099	0.937423	2.44101	56.2713
98.4482	33.1179	2.99772	65.4353	2.54841	0.1134	0.00427594	24.6511	1.9679	5.10329	2.55298	0.270384	100.958	5.31155	0.454249	10.4449	0.276609	0.851503	25.8999	1.54613	1.06607	3.54992	5.28087	1.44991	0.229368	1.05532	31.8472	8.28107	4.28732	51.4818	4.45025	2.29952	0.112587	104.608	0.543926	1.23299	10.1279	3.29483	0.563046	40.1481	23.807	7.53482	83.7318	2.4293	5.96102	15.7165	18.9145	1.12213	2.83004	34.1881
42.1067	19.2156	3.24856	102.971	2.02681	0.20486	0.38372	17.5567	1.11648	3.93272	1.71792	0.456085	25.0733	3.32779	0.689	1.54143	0.0293613	0.534911	2.00291	1.19414	0.946944	2.36643	3.71402	4.56707	0.326427	0.261021	5.65901	3.29264	3.86298	44.3451	3.84181	1.50748	0.173582	29.5867	0.586976	0.880758	4.09725	3.24547	3.05608	15.025	23.3507	1.17216	0.259523	0.949501	3.99698	8.92151	12.2114	0.759852	1.80194	20.3452
31.9655	23.7121	136.662	90.7939	0.67666	0.252984	0.867354	32.7086	0.993391	4.58596	1.10595	0.127339	72.2536	11.2564	0.0400123	1.02015	0.497611	2.94445	3.3587	1.54522	0.989363	5.3071	4.2158	2.94445	0.0586346	0.131136	0.830185	1.38415	35.2556	61.4408	4.11251	1.09325	0.125169	19.84	0.158607	0.904071	3.96669	1.72312	3.31767	16.8617	11.289	3.35858	10.7146	1.41504	6.69135	8.8479	9.914	1.58786	1.60821	38.1626
8.09157	14.9733	64.9917	70.4138	1.81845	0.278736	1.16821	11.9627	1.47068	3.99479	0.616627	0.323103	31.2279	8.01588	0.0029433	1.69112	0.272542	1.87806	0.768607	0.85832	0.985417	4.79743	3.88202	1.87806	0.329437	0.57851	0.820033	1.26031	15.0826	38.1608	3.20797	1.72676	0.339458	15.36	0.566132	1.305	7.18207	1.95639	1.87216	9.99384	7.962	1.33155	0.00369912	1.46362	5.51608	10.2185	9.14197	1.72193	1.46946	26.712
1.83052	17.0219	102.412	73.8228	0.52392	0.263688	0.495437	14.603	1.03774	6.74582	1.33971	0.183349	91.8507	8.03526	0.00249846	1.24761	0.595854	1.59422	3.49602	2.10004	1.17501	4.83064	2.95658	1.59422	0.179807	0.853486	1.98542	0.851334	25.4122	67.8392	5.90873	2.05289	0.0490731	13.9902	0.158398	1.3025	4.5609	2.22406	2.31967	39.9824	13.2015	7.057	3.38291	1.62384	9.49274	8.7676	10.3424	1.71737	1.6128	29.3336
14.3572	25.2189	88.5115	80.0897	0.929816	0.219797	0.00277127	34.1107	1.04446	5.6373	1.05848	0.139158	58.5694	8.86455	0.122587	1.57649	0.349448	1.42213	4.25663	1.11119	1.00625	7.97749	4.21273	1.42213	0.255028	0.323746	1.28211	1.6812	32.6631	58.1317	4.78715	1.59692	0.0681462	24.2491	0.384075	1.44634	5.47094	2.65086	1.90032	23.3102	12.1323	2.30141	0.875227	1.80965	6.3022	15.0303	18.6047	2.78854	2.25132	34.3808
11.7614	24.3224	99.2871	83.3181	0.603165	0.558006	0.789794	23.1984	1.03633	3.64675	0.861904	0.350778	54.5433	8.89612	0.00248969	0.906154	0.463236	1.58862	1.22194	1.38298	1.0805	4.89515	3.08146	1.58862	0.102618	0.285274	0.782898	0.909011	17.0756	48.2382	3.71011	1.49234	0.0774611	11.9527	0.17923	1.03299	4.996	3.8021	3.35262	30.7425	15.1656	2.90902	0.253069	1.58985	7.09882	10.8667	14.2801	1.98291	2.52277	36.1928
13.6331	24.556	148.527	153.551	0.65084	0.192117	0.00364255	28.2673	0.992105	4.45427	1.4453	0.15957	139.476	12.3701	0.00339528	1.0885	0.772822	2.16646	2.19569	1.78928	0.822423	10.7349	5.07017	2.16646	0.149486	0.52318	2.02875	2.37116	37.3197	66.849	3.5942	1.5378	0.0194092	32.5089	0.32568	1.17649	8.71895	3.34219	2.71303	44.8617	16.3524	1.82314	0.115894	1.61095	6.12279	14.2527	16.8239	1.60874	3.06214	39.7475
3.16684	3.11498	23.185	29.9753	0.906405	0.524533	1.282	1.4	0.99678	2.2438	0.716701	0.576041	1.74163	1.30025	1.68007	1.28296	0.388313	1.89612	2.67858	1.39659	0.693559	7.16273	1.41822	1.89612	0.524172	1.28058	0.916609	1.09831	57.4303	12.3041	1.02005	1.35024	0.288491	1.82598	0.67572	0.678799	1.07061	0.559212	0.79719	1.49376	3.19427	1.30259	79.0221	0.525885	2.30636	1.86813	4.07297	1.377	0.770294	7.16841
5.65393	6.46386	54.662	62.033	0.977575	0.444974	0.91041	5.59292	1.37722	2.74645	0.469289	0.364533	10.5514	2.10085	0.319301	2.17296	4.56461	1.54155	2.45421	0.963303	1.17058	13.1514	2.3119	1.54155	0.515416	1.09554	0.819523	2.11456	43.5371	18.6433	1.97838	1.80752	0.251441	13.9541	1.31644	0.555944	1.98463	0.761053	3.51869	6.12828	3.65621	0.953269	0.177352	0.705084	2.38804	5.4054	10.8411	1.55593	0.874729	10.0054
0.477543	2.08523	18.1998	18.4926	1.17975	0.334653	0.866044	1.24054	1.04886	2.15014	0.623986	0.340423	1.35287	1.62016	0.4265	0.992478	0.333911	1.26601	0.721056	0.823069	0.779081	4.87905	1.6251	1.26601	0.674364	0.915831	0.531784	0.996236	22.5371	12.3104	1.15782	1.38836	0.321829	1.8865	0.483039	0.804387	0.998227	1.10481	0.466952	1.10167	2.18393	1.20469	30.6815	0.808121	1.82686	0.899915	1.96571	1.86788	0.604222	6.53749
2.11672	1.70489	19.7794	21.6982	1.20505	0.425084	1.06219	1.63795	1.42269	4.08371	0.590537	0.329558	1.66723	1.65282	0.592355	1.12141	0.403843	1.29336	1.16394	1.80024	0.686196	8.48758	1.97081	1.29336	0.426197	1.00609	0.698119	1.29049	71.2756	15.2952	1.25688	1.60932	0.390052	4.13517	0.588463	1.1191	1.18961	1.25355	0.455895	1.1993	1.62328	1.5963	0.285554	0.866145	1.8064	0.973936	2.03062	1.58995	0.814143	5.73277
1.68936	2.67824	15.8114	12.6092	0.88078	0.82115	0.850763	1.06414	1.21354	4.28332	0.57941	0.798464	1.70332	2.25036	0.241023	1.77242	0.316829	1.49683	0.439305	2.19032	0.98159	4.41434	2.14764	1.49683	0.48386	0.60121	0.88554	0.827921	24.7251	20.1771	1.43378	1.56998	0.297439	3.20749	0.395304	0.793998	1.26469	0.87654	3.9085	1.25764	1.59485	0.935492	8.16	0.731528	1.89127	1.77561	2.2894	2.09425	0.763076	8.06595
0.987119	3.10077	34.0808	36.1378	0.510635	0.363492	1.06247	2.01899	0.951647	2.87115	0.761946	0.469091	3.58364	2.35054	0.499945	1.26083	1.64513	1.26704	0.730686	1.80803	0.924194	11.4367	3.02346	1.26704	0.664049	1.69456	1.13477	1.16272	19.6874	25.8838	2.13878	2.05346	0.210711	7.09714	0.501032	1.07511	1.40119	0.89602	1.38381	2.50686	2.81366	0.886977	1.03006	0.871082	2.09128	2.16054	3.79053	2.88525	0.952779	9.44977
[truncated: 21 more columns]
