# Supplementary material for: Modulation of fracture healing by the transient accumulation of senescent cells
Source: eLife. 2021 Oct 7;10:e69958. doi: 10.7554/eLife.69958 (PMC8526061; doi:10.7554/eLife.69958)
Supplement: Figure 4—source data 1. [file elife-69958-fig4-data1.xlsx]

## Sheet: Fig. 4A
Vegfa		Control			Treated
	days	Mean	SEM	N	Mean	SEM	N	tests		P value	Mean of Control	Mean of Treated	Difference	SE of difference	t ratio	df	q value
	4	1	0.066422	6	2.12124	0.440625	6			0.030584	1	2.121	-1.121	0.4456	2.516	10	0.020593
	8	1	0.183987	6	6.07933	0.918997	6			0.000293	1	6.079	-5.079	0.9372	5.419	10	0.000296
	14	1	0.064306	6	5.81593	0.732119	6			6.4e-05	1	5.816	-4.816	0.7349	6.553	10	0.00013
	28	1	0.149675	6	1.31816	0.145384	6			0.158297	1	1.318	-0.3182	0.2087	1.525	10	0.07994
Igfbp3
	4	1	0.21336	6	3.17345	0.333203	6			<0.000001	1	3.173	-2.173	0.1615	13.46	10	<0.000001
	8	1	0.093317	6	22.0334	4.51421	6			<0.000001	1	22.03	-21.03	1.843	11.41	10	<0.000001
	14	1	0.076999	6	24.1418	3.78593	6			<0.000001	1	24.14	-23.14	1.546	14.97	10	<0.000001
	28	1	0.120881	6	2.15909	0.700031	6			0.002532	1	2.159	-1.159	0.29	3.997	10	0.002557
Igfbp4
	4	1	0.115593	6	1.7202	0.263752	6			0.031396	1	1.72	-0.7202	0.288	2.501	10	0.007927
	8	1	0.057371	6	3.99887	0.379524	6			1.4e-05	1	3.999	-2.999	0.3838	7.813	10	7e-06
	14	1	0.146221	6	3.90313	0.322859	6			1e-05	1	3.903	-2.903	0.3544	8.191	10	7e-06
	28	1	0.06819	6	2.08286	0.231316	6			0.00116	1	2.083	-1.083	0.2412	4.49	10	0.000391

## Sheet: Fig. 4B
Ccl2		Control			Treated				tests
	days	Mean	SEM	N	Mean	SEM	N		P value	Mean of Control	Mean of Treated	Difference	SE of difference	t ratio	df	q value
	4	1	0.185795	6	13.3022	2.85315	6		0.001555	1	13.3	-12.3	2.859	4.303	10	0.000687
	8	1	0.218367	6	19.4126	4.45163	6		0.00204	1	19.41	-18.41	4.457	4.131	10	0.000687
	14	1	0.154	6	14.9103	2.94429	6		0.000819	1	14.91	-13.91	2.948	4.718	10	0.000687
	28	1	0.177925	6	2.87661	0.837293	6		0.053126	1	2.877	-1.877	0.856	2.192	10	0.013414
Ccl7	4	1	0.350869	6	29.4184	7.23191	6		2e-06	1	29.42	-28.42	2.956	9.614	10	3e-06
	8	1	0.527931	6	54.5338	12.3999	6		<0.000001	1	54.53	-53.53	5.067	10.57	10	2e-06
	14	1	0.162497	6	74.6535	15.3323	6		<0.000001	1	74.65	-73.65	6.26	11.77	10	1e-06
	28	1	0.184753	6	3.43334	1.46049	6		0.002328	1	3.433	-2.433	0.601	4.049	10	0.002351
Pdgfa	4	1	0.103969	6	5.46984	0.633163	6		8.3e-05	1	5.47	-4.47	1.021	4.38	40	2.8e-05
	8	1	0.159391	6	20.2256	1.45455	6		<0.000001	1	20.23	-19.23	1.021	18.84	40	<0.000001
	14	1	0.107009	6	12.6838	1.21698	6		<0.000001	1	12.68	-11.68	1.021	11.45	40	<0.000001
	28	1	0.030803	6	2.51103	0.346618	6		0.146561	1	2.511	-1.511	1.021	1.481	40	0.037007

## Sheet: Fig. 4C
Serpine1		Control			Treated				tests
	days	Mean	SEM	N	Mean	SEM	N		P value	Mean of Control	Mean of Treated	Difference	SE of difference	t ratio	df	q value
	4	1	0.111381	6	51.837	11.6879	6		<0.000001	1	51.84	-50.84	4.772	10.65	10	1e-06
	8	1	0.324646	6	66.8531	14.5716	6		<0.000001	1	66.85	-65.85	5.95	11.07	10	1e-06
	14	1	0.168306	6	19.6502	3.14232	6		<0.000001	1	19.65	-18.65	1.285	14.52	10	<0.000001
	28	1	0.119272	6	5.35106	1.89352	6		0.000222	1	5.351	-4.351	0.7746	5.617	10	0.000224
Mmp9	4	1	0.156065	6	1.06153	0.064107	6		0.39267	1	1.062	-0.06153	0.06888	0.8933	10	0.099149
	8	1	0.090779	6	3.91474	0.296331	6		<0.000001	1	3.915	-2.915	0.1265	23.04	10	<0.000001
	14	1	0.042399	6	4.22011	0.402526	6		<0.000001	1	4.22	-3.22	0.1652	19.49	10	<0.000001
	28	1	0.071593	6	1.49761	0.186885	6		0.000117	1	1.498	-0.4976	0.0817	6.091	10	3.9e-05
Mmp13	4	1	0.156493	6	14.4144	2.68664	6		<0.000001	1	14.41	-13.41	1.099	12.21	10	<0.000001
	8	1	0.198158	6	47.538	3.54748	6		<0.000001	1	47.54	-46.54	1.451	32.08	10	<0.000001
	14	1	0.079139	6	56.7766	4.71479	6		<0.000001	1	56.78	-55.78	1.925	28.97	10	<0.000001
	28	1	0.085064	6	17.4356	2.14109	6		<0.000001	1	17.44	-16.44	0.8748	18.79	10	<0.000001

## Sheet: Fig. 4D
Foxo4		Control			Treated				tests
	days	Mean	SEM	N	Mean	SEM	N		P value	Mean of Control	Mean of Treated	Difference	SE of difference	t ratio	df	q value
	4	1	0.153048	6	1.1116	0.156427	6		0.621158	1	1.112	-0.1116	0.2188	0.5099	10	0.313685
	8	1	0.19906	6	3.17308	0.234207	6		3.4e-05	1	3.173	-2.173	0.3074	7.07	10	6.9e-05
	14	1	0.125367	6	2.61645	0.332733	6		0.001065	1	2.616	-1.616	0.3556	4.546	10	0.001075
	28	1	0.029446	6	0.908531	0.100419	6		0.402583	1	0.9085	0.09147	0.1046	0.8741	10	0.271073
Nfkb1	4	1	0.176285	6	1.03308	0.068534	6		0.86465	1	1.033	-0.03308	0.1891	0.1749	10	0.436648
	8	1	0.149319	6	1.85179	0.307202	6		0.031785	1	1.852	-0.8518	0.3416	2.494	10	0.021402
	14	1	0.096946	6	1.58333	0.128032	6		0.004595	1	1.583	-0.5833	0.1606	3.632	10	0.004641
	28	1	0.080108	6	1.62982	0.108246	6		0.000872	1	1.63	-0.6298	0.1347	4.677	10	0.001761
Tp53	4	1	0.251672	6	0.945	0.084944	6		0.840117	1	0.945	0.055	0.2656	0.2071	10	0.848518
	8	1	0.060485	6	3.89392	1.39717	6		0.065356	1	3.894	-2.894	1.398	2.069	10	0.132019
	14	1	0.197594	6	3.13012	0.839668	6		0.033139	1	3.13	-2.13	0.8626	2.469	10	0.132019
	28	1	0.108252	6	1.14655	0.11244	6		0.369882	1	1.147	-0.1466	0.1561	0.9389	10	0.498108

## Sheet: Fig. 4E
Tgfbr1		Control			Treated				tests
	days	Mean	SEM	N	Mean	SEM	N		P value	Mean of Control	Mean of Treated	Difference	SE of difference	t ratio	df	q value
	4	1	0.115285	6	2.92145	0.216269	6		1.4e-05	1	2.921	-1.921	0.2451	7.84	10	1.4e-05
	8	1	0.100503	6	5.44702	0.340133	6		<0.000001	1	5.447	-4.447	0.3547	12.54	10	<0.000001
	14	1	0.079175	6	6.87066	0.567945	6		1e-06	1	6.871	-5.871	0.5734	10.24	10	3e-06
	28	1	0.037274	6	2.0517	0.102633	6		2e-06	1	2.052	-1.052	0.1092	9.632	10	3e-06
Tgfb1	4	1	0.209958	6	1.2611	0.242809	6		0.074323	1	1.261	-0.2611	0.131	1.992	10	0.037533
	8	1	0.074068	6	1.60031	0.481238	6		0.012895	1	1.6	-0.6003	0.1988	3.02	10	0.008683
	14	1	0.128463	6	1.58549	0.126682	6		1.2e-05	1	1.585	-0.5855	0.07366	7.949	10	2.5e-05
	28	1	0.118265	6	0.751307	0.118395	6		0.004535	1	0.7513	0.2487	0.06832	3.64	10	0.00458
Tgfb2	4	1	0.157922	6	16.8289	4.54246	6		7e-06	1	16.83	-15.83	1.856	8.531	10	9e-06
	8	1	0.197354	6	16.0777	2.34205	6		<0.000001	1	16.08	-15.08	0.9595	15.71	10	<0.000001
	14	1	0.073043	6	11.3306	1.10168	6		<0.000001	1	11.33	-10.33	0.4507	22.92	10	<0.000001
	28	1	0.141965	6	2.18059	0.677189	6		0.001889	1	2.181	-1.181	0.2825	4.18	10	0.001908

## Sheet: Fig. 4F
Il1b		Control			Treated				tests
	days	Mean	SEM	N	Mean	SEM	N		P value	Mean of Control	Mean of Treated	Difference	SE of difference	t ratio	df	q value
	4	1	0.173905	6	0.368808	0.060803	6		0.00648	1	0.3688	0.6312	0.1842	3.426	10	0.02618
	8	1	0.205553	6	0.698188	0.121486	6		0.234888	1	0.6982	0.3018	0.2388	1.264	10	0.316316
	14	1	0.169954	6	0.449222	0.104788	6		0.02018	1	0.4492	0.5508	0.1997	2.759	10	0.040763
	28	1	0.135555	6	1.09897	0.150294	6		0.635398	1	1.099	-0.09897	0.2024	0.489	10	0.641752
Il6	4	1	0.594445	6	2.68905	1.69064	6		0.043608	1	2.689	-1.689	0.7316	2.309	10	0.029363
	8	1	0.195702	6	17.418	5.07901	6		1.3e-05	1	17.42	-16.42	2.075	7.912	10	2.6e-05
	14	1	0.268969	6	1.28823	0.239364	6		0.078323	1	1.288	-0.2882	0.147	1.961	10	0.039553
	28	1	0.061912	6	0.831057	0.083645	6		0.002615	1	0.8311	0.1689	0.04248	3.977	10	0.002642
Il17a	4	1	0.240457	6	19.7339	9.09823	6		0.000505	1	19.73	-18.73	3.716	5.042	10	0.00068
	8	1	0.793667	6	8.71457	4.10622	6		0.001111	1	8.715	-7.715	1.707	4.518	10	0.001122
	14	1	0.075691	6	1.93232	0.229122	6		3e-06	1	1.932	-0.9323	0.09851	9.464	10	5e-06
	28	1	0.039255	6	1.46015	0.100141	6		1e-06	1	1.46	-0.4602	0.04391	10.48	10	4e-06

## Sheet: Fig. 4G
Cdkn1a (p21)	Cdkn2a (pan)	Igfbp3	Mmp13	Vegfa	Foxo4	Pdgfa	Tgfbr1	Igfbp4
9.88436	11.0423	2.94647	25.412	2.46519	1.00682	6.35158	2.95949	1.37153
6.66928	12.8446	3.24322	11.774	1.32708	0.767875	5.37298	2.29692	1.87621
3.82434	6.32352	1.98382	6.5148	1.28467	0.91792	3.813	2.38079	1.26112
12.6246	18.6643	4.30972	17.803	4.10613	1.85449	7.86304	2.86309	2.09785
10.3105	14.8415	2.75633	10.5755	1.46219	0.988825	3.8119	3.43274	0.976862
5.1189	20.6102	3.80116	14.4072	2.08219	1.13367	5.60654	3.59565	2.73761
25.48	129.467	25.056	53.391	5.71999	2.60839	17.0845	5.61615	2.82811
23.1701	124.662	40.4108	58.2309	7.07853	3.4944	22.4061	5.04031	3.90708
13.972	71.177	7.43293	33.7125	4.3892	2.42238	15.1447	6.36637	3.36277
26.8338	119.43	17.0927	44.0666	5.06307	3.973	19.5609	5.70132	4.9004
33.1179	65.4353	24.6511	51.4818	10.1279	3.29483	23.807	5.96102	5.28087
19.2156	102.971	17.5567	44.3451	4.09725	3.24547	23.3507	3.99698	3.71402
23.7121	90.7939	32.7086	61.4408	3.96669	1.72312	11.289	6.69135	4.2158
14.9733	70.4138	11.9627	38.1608	7.18207	1.95639	7.962	5.51608	3.88202
17.0219	73.8228	14.603	67.8392	4.5609	2.22406	13.2015	9.49274	2.95658
25.2189	80.0897	34.1107	58.1317	5.47094	2.65086	12.1323	6.3022	4.21273
24.3224	83.3181	23.1984	48.2382	4.996	3.8021	15.1656	7.09882	3.08146
24.556	153.551	28.2673	66.849	8.71895	3.34219	16.3524	6.12279	5.07017
3.11498	29.9753	1.4	12.3041	1.07061	0.559212	3.19427	2.30636	1.41822
6.46386	62.033	5.59292	18.6433	1.98463	0.761053	3.65621	2.38804	2.3119
2.08523	18.4926	1.24054	12.3104	0.998227	1.10481	2.18393	1.82686	1.6251
1.70489	21.6982	1.63795	15.2952	1.18961	1.25355	1.62328	1.8064	1.97081
2.67824	12.6092	1.06414	20.1771	1.26469	0.87654	1.59485	1.89127	2.14764
3.10077	36.1378	2.01899	25.8838	1.40119	0.89602	2.81366	2.09128	3.02346
