# Supplementary material for: Modulation of fracture healing by the transient accumulation of senescent cells
Source: eLife. 2021 Oct 7;10:e69958. doi: 10.7554/eLife.69958 (PMC8526061; doi:10.7554/eLife.69958)
Supplement: Figure 5—source data 1. [file elife-69958-fig5-data1.xlsx]

## Sheet: Fig. 5B
Veh	D+Q
0.889868	0.880726
0.725475	1.05795		Table Analyzed	Col: Entering replicate data
0.723328	0.831601
1.04716	0.825818		Column B	D+Q
1.34224	0.62348		vs.	vs.
0.969448	0.669136		Column A	Veh
1.26904	0.885737
1.03344	0.888051		Unpaired t test
			P value	0.0947
			P value summary	ns
			Significantly different (P < 0.05)?	No
			One- or two-tailed P value?	Two-tailed
			t, df	t=1.792, df=14
			How big is the difference?
			Mean of column A	1
			Mean of column B	0.8328
			Difference between means (B - A) ± SEM	-0.1672 ± 0.09329
			95% confidence interval	-0.3673 to 0.03289
			R squared (eta squared)	0.1866
			F test to compare variances
			F, DFn, Dfd	2.763, 7, 7
			P value	0.2033
			P value summary	ns
			Significantly different (P < 0.05)?	No
			Data analyzed
			Sample size, column A	8
			Sample size, column B	8

## Sheet: Fig. 5F
Veh	D+Q
0.889868	1.49765
0.725475	1.14612		Table Analyzed	Col: Entering replicate data
0.723328	0.697939
1.04716	1.49077		Column B	D+Q
1.34224	1.48432		vs.	vs.
0.969448	1.64607		Column A	Veh
1.26904	1.57723
1.03344	1.61353		Unpaired t test
			P value	0.0131
			P value summary	*
			Significantly different (P < 0.05)?	Yes
			One- or two-tailed P value?	Two-tailed
			t, df	t=2.842, df=14
			How big is the difference?
			Mean of column A	1
			Mean of column B	1.394
			Difference between means (B - A) ± SEM	0.3942 ± 0.1387
			95% confidence interval	0.09672 to 0.6917
			R squared (eta squared)	0.3659
			F test to compare variances
			F, DFn, Dfd	2.011, 7, 7
			P value	0.3771
			P value summary	ns
			Significantly different (P < 0.05)?	No
			Data analyzed
			Sample size, column A	8
			Sample size, column B	8

## Sheet: Fig. 5C
Veh	Veh + DQ	Veh + H2O2	Veh + H2O2 + DQ
0.0604	0.0481	0.3047	0.2725
0.0153	0.0293	0.3027	0.0705		Number of families	1
0.017	0.0228	0.3192	0.0228		Number of comparisons per family	6
0.0762	0.0486	0.5359	0.1492		Q	0.05
0.0714	0.0673	0.3198	0.0751
0.0479	0.024	0.3424	0.0881		Original FDR method of Benjamini and Hochberg	Mean rank diff.	Discovery?	q value	Individual P Value
0.0836	0.0142	0.2621	0.1274		Veh vs. Veh + DQ	3.35	No	0.5217	0.5217	A-B
0.0287	0.0329	0.3051	0.1476		Veh vs. Veh + H2O2	-21.8	Yes	<0.0001	<0.0001	A-C
0.088	0.0729	0.3161	0.1894		Veh vs. Veh + H2O2 + DQ	-9.15	No	0.0961	0.0801	A-D
0.0872	0.0822	0.2998	0.1697		Veh + DQ vs. Veh + H2O2	-25.15	Yes	<0.0001	<0.0001	B-C
					Veh + DQ vs. Veh + H2O2 + DQ	-12.5	Yes	0.0252	0.0168	B-D
					Veh + H2O2 vs. Veh + H2O2 + DQ	12.65	Yes	0.0252	0.0155	C-D
					Test details	Mean rank 1	Mean rank 2	Mean rank diff.	n1	n2
					Veh vs. Veh + DQ	13.6	10.25	3.35	10	10
					Veh vs. Veh + H2O2	13.6	35.4	-21.8	10	10
					Veh vs. Veh + H2O2 + DQ	13.6	22.75	-9.15	10	10
					Veh + DQ vs. Veh + H2O2	10.25	35.4	-25.15	10	10
					Veh + DQ vs. Veh + H2O2 + DQ	10.25	22.75	-12.5	10	10
					Veh + H2O2 vs. Veh + H2O2 + DQ	35.4	22.75	12.65	10	10

## Sheet: Fig. 5G
Veh	Veh + DQ	Veh + H2O2	Veh + DQ + H2O2
0.0604	0.0699	0.3047	0.3191
0.0153	0.0222	0.3027	0.2816		Number of families	1
0.017	0.0277	0.3192	0.2648		Number of comparisons per family	6
0.0762	0.035	0.5359	0.3054		Q	0.05
0.0714	0.0294	0.3198	0.2046
0.0479	0.0528	0.3424	0.3072		Original FDR method of Benjamini and Hochberg	Mean rank diff.	Discovery?	q value	Individual P Value
0.0836	0.0288	0.2621	0.2891		Veh vs. Veh + DQ	4	No	0.4442	0.4442	A-B
0.0287	0.0206	0.3051	0.214		Veh vs. Veh + H2O2	-21.1	Yes	0.0002	<0.0001	A-C
0.088	0.0449	0.3161	0.2507		Veh vs. Veh + DQ + H2O2	-14.9	Yes	0.0066	0.0044	A-D
0.0872	0.0346	0.2998	0.2559		Veh + DQ vs. Veh + H2O2	-25.1	Yes	<0.0001	<0.0001	B-C
					Veh + DQ vs. Veh + DQ + H2O2	-18.9	Yes	0.0006	0.0003	B-D
					Veh + H2O2 vs. Veh + DQ + H2O2	6.2	No	0.2828	0.2357	C-D
					Test details	Mean rank 1	Mean rank 2	Mean rank diff.	n1	n2
					Veh vs. Veh + DQ	12.5	8.5	4	10	10
					Veh vs. Veh + H2O2	12.5	33.6	-21.1	10	10
					Veh vs. Veh + DQ + H2O2	12.5	27.4	-14.9	10	10
					Veh + DQ vs. Veh + H2O2	8.5	33.6	-25.1	10	10
					Veh + DQ vs. Veh + DQ + H2O2	8.5	27.4	-18.9	10	10
					Veh + H2O2 vs. Veh + DQ + H2O2	33.6	27.4	6.2	10	10
