# Supplementary material for: Modulation of fracture healing by the transient accumulation of senescent cells
Source: eLife. 2021 Oct 7;10:e69958. doi: 10.7554/eLife.69958 (PMC8526061; doi:10.7554/eLife.69958)
Supplement: Figure 6—figure supplement 1—source data 1. — Raw scores for Figure 6—figure supplement 1, panel B. [file elife-69958-fig6-figsupp1-data1.xlsx]

## Sheet: Figure 6 – figure supplement 1A
	Veh			DQ
	Mean	SEM	N	Mean	SEM	N
Cdkn1a	1	0.14182	5	0.948867	0.255522	6
Cdkn2a-pan	1	0.131973	5	0.290941	0.107338	6
Igfbp3	1	0.252802	5	1.51052	0.278203	6
Igfbp4	1	0.302267	5	3.18357	0.603928	6
Spp1	1	0.351447	5	0.375493	0.15394	6
Sparc	1	0.207708	5	1.11155	0.113326	6
Vegfa	1	0.499287	5	0.304676	0.076231	6
Icam1	1	0.447157	5	0.553479	0.154201	6
Serpine1	1	0.211251	5	1.86389	0.268762	6
Pdgfb	1	0.182524	5	2.161	0.357125	6
Igf1	1	0.404075	5	0.455642	0.113698	6
Gdf15	1	0.169586	5	3.49198	1.4089	6
Csf1	1	0.219237	5	1.17674	0.144134	6
Gas6	1	0.257551	5	1.24624	0.219825	6
Mif	1	0.286837	5	0.625267	0.347363	6
Il1b	1	0.500523	5	0.290914	0.070576	6
Il6	1	0.456738	5	1.98017	0.129142	6
Il10	1	0.252737	5	4.94226	0.851741	6
Il12a	1	0.481031	5	1.99623	0.299784	6
Il15	1	0.456522	5	1.37103	0.404804	6
Il17a	1	0.947711	5	0.00324	0.001734	6
Ccl2	1	0.395229	5	3.59657	0.22604	6
Ccl7	1	0.547653	5	1.31393	0.403164	6
Cxcl1	1	0.15384	5	0.280577	0.081535	6
Cxcl2	1	0.174828	5	0.086765	0.021853	6
Cxcl10	1	0.235659	5	1.27555	0.55272	6
Cxcl12	1	0.360079	5	0.444494	0.133667	6
Cxcl16	1	0.141328	5	2.65493	0.587464	6
Mmp2	1	0.390249	5	0.774345	0.160009	6
Mmp7	1	0.273201	5	17.5532	5.26848	6
Mmp9	1	0.307059	5	0.494008	0.150816	6
Mmp13	1	0.258511	5	0.395897	0.20611	6
Tgfb1	1	0.237691	5	0.738235	0.180343	6
Tgfbr1	1	0.389047	5	0.316965	0.068191	6
Tgfb2	1	0.301758	5	1.99855	0.181212	6
Tnf	1	0.708567	5	1.30662	0.351478	6
Tnfsf10	1	0.230036	5	1.27498	0.229922	6
Tnfsf11	1	0.420234	5	1.05709	0.287551	6
Tnfrsf11b	1	0.433125	5	1.83543	0.380952	6
Tnfrsf12a	1	0.568716	5	0.5109	0.198954	6
Cdkn2a-pan			Gdf15			Tgfbr1			Mmp9			Il6			Il12a			Il1b			Cxcl12			Vegfa			Spp1			Tnfrsf11b			Mmp13
Table Analyzed	Cdkn2a-pan		Table Analyzed	Gdf15		Table Analyzed	Tgfbr1		Table Analyzed	Mmp9		Table Analyzed	Il6		Table Analyzed	Il12a		Table Analyzed	Il1b		Table Analyzed	Cxcl12		Table Analyzed	Vegfa		Table Analyzed	Spp1		Table Analyzed	Tnfrsf11b		Table Analyzed	Mmp13
Column B	DQ		Column B	DQ		Column B	DQ		Column B	DQ		Column B	DQ		Column B	DQ		Column B	DQ		Column B	DQ		Column B	DQ		Column B	DQ		Column B	DQ		Column B	DQ
vs.	vs.		vs.	vs.		vs.	vs.		vs.	vs.		vs.	vs.		vs.	vs.		vs.	vs.		vs.	vs.		vs.	vs.		vs.	vs.		vs.	vs.		vs.	vs.
Column A	Veh		Column A	Veh		Column A	Veh		Column A	Veh		Column A	Veh		Column A	Veh		Column A	Veh		Column A	Veh		Column A	Veh		Column A	Veh		Column A	Veh		Column A	Veh
Mann Whitney test			Mann Whitney test			Unpaired t test			Unpaired t test			Unpaired t test			Unpaired t test			Unpaired t test			Unpaired t test			Mann Whitney test			Unpaired t test			Unpaired t test			Mann Whitney test
P value	0.0303		P value	0.0303		P value	0.0897		P value	0.1522		P value	0.0513		P value	0.1015		P value	0.1564		P value	0.1542		P value	0.4286		P value	0.1168		P value	0.18		P value	0.1255
Exact or approximate P value?	Exact		Exact or approximate P value?	Exact		P value summary	ns		P value summary	ns		P value summary	ns		P value summary	ns		P value summary	ns		P value summary	ns		Exact or approximate P value?	Exact		P value summary	ns		P value summary	ns		Exact or approximate P value?	Exact
P value summary	*		P value summary	*		Significantly different (P < 0.05)?	No		Significantly different (P < 0.05)?	No		Significantly different (P < 0.05)?	No		Significantly different (P < 0.05)?	No		Significantly different (P < 0.05)?	No		Significantly different (P < 0.05)?	No		P value summary	ns		Significantly different (P < 0.05)?	No		Significantly different (P < 0.05)?	No		P value summary	ns
Significantly different (P < 0.05)?	Yes		Significantly different (P < 0.05)?	Yes		One- or two-tailed P value?	Two-tailed		One- or two-tailed P value?	Two-tailed		One- or two-tailed P value?	Two-tailed		One- or two-tailed P value?	Two-tailed		One- or two-tailed P value?	Two-tailed		One- or two-tailed P value?	Two-tailed		Significantly different (P < 0.05)?	No		One- or two-tailed P value?	Two-tailed		One- or two-tailed P value?	Two-tailed		Significantly different (P < 0.05)?	No
One- or two-tailed P value?	Two-tailed		One- or two-tailed P value?	Two-tailed		t, df	t=1.902, df=9		t, df	t=1.564, df=9		t, df	t=2.247, df=9		t, df	t=1.824, df=9		t, df	t=1.547, df=9		t, df	t=1.556, df=9		One- or two-tailed P value?	Two-tailed		t, df	t=1.735, df=9		t, df	t=1.454, df=9		One- or two-tailed P value?	Two-tailed
Sum of ranks in column A,B	18 , 48		Sum of ranks in column A,B	18 , 48																				Sum of ranks in column A,B	35 , 31								Sum of ranks in column A,B	39 , 27
Mann-Whitney U	3		Mann-Whitney U	3		How big is the difference?			How big is the difference?			How big is the difference?			How big is the difference?			How big is the difference?			How big is the difference?			Mann-Whitney U	10		How big is the difference?			How big is the difference?			Mann-Whitney U	6
						Mean of column A	1		Mean of column A	1		Mean of column A	1		Mean of column A	1		Mean of column A	1		Mean of column A	1					Mean of column A	1		Mean of column A	1
Difference between medians			Difference between medians			Mean of column B	0.317		Mean of column B	0.494		Mean of column B	1.98		Mean of column B	1.996		Mean of column B	0.2909		Mean of column B	0.4445		Difference between medians			Mean of column B	0.3755		Mean of column B	1.835		Difference between medians
Median of column A	0.6738, n=5		Median of column A	1.124, n=5		Difference between means (B - A) ± SEM	-0.6830 ± 0.3592		Difference between means (B - A) ± SEM	-0.5060 ± 0.3235		Difference between means (B - A) ± SEM	0.9802 ± 0.4363		Difference between means (B - A) ± SEM	0.9962 ± 0.5462		Difference between means (B - A) ± SEM	-0.7091 ± 0.4585		Difference between means (B - A) ± SEM	-0.5555 ± 0.3570		Median of column A	0.4641, n=5		Difference between means (B - A) ± SEM	-0.6245 ± 0.3600		Difference between means (B - A) ± SEM	0.8354 ± 0.5747		Median of column A	0.7120, n=5
Median of column B	3.511, n=6		Median of column B	2.142, n=6		95% confidence interval	-1.496 to 0.1295		95% confidence interval	-1.238 to 0.2257		95% confidence interval	-0.006822 to 1.967		95% confidence interval	-0.2395 to 2.232		95% confidence interval	-1.746 to 0.3281		95% confidence interval	-1.363 to 0.2522		Median of column B	0.1990, n=6		95% confidence interval	-1.439 to 0.1899		95% confidence interval	-0.4645 to 2.135		Median of column B	0.08422, n=6
Difference: Actual	2.837		Difference: Actual	1.017		R squared (eta squared)	0.2866		R squared (eta squared)	0.2138		R squared (eta squared)	0.3593		R squared (eta squared)	0.2698		R squared (eta squared)	0.21		R squared (eta squared)	0.212		Difference: Actual	-0.2651		R squared (eta squared)	0.2506		R squared (eta squared)	0.1902		Difference: Actual	-0.6278
Difference: Hodges-Lehmann	2.638		Difference: Hodges-Lehmann	1.186																				Difference: Hodges-Lehmann	-0.2651								Difference: Hodges-Lehmann	-0.6124
						F test to compare variances			F test to compare variances			F test to compare variances			F test to compare variances			F test to compare variances			F test to compare variances						F test to compare variances			F test to compare variances
						F, DFn, Dfd	27.12, 4, 5		F, DFn, Dfd	3.454, 4, 5		F, DFn, Dfd	10.42, 4, 5		F, DFn, Dfd	2.146, 4, 5		F, DFn, Dfd	41.91, 4, 5		F, DFn, Dfd	6.047, 4, 5					F, DFn, Dfd	4.343, 4, 5		F, DFn, Dfd	1.077, 4, 5
						P value	0.0028		P value	0.2064		P value	0.0243		P value	0.4242		P value	0.001		P value	0.0746					P value	0.1389		P value	0.9122
						P value summary	**		P value summary	ns		P value summary	*		P value summary	ns		P value summary	***		P value summary	ns					P value summary	ns		P value summary	ns
						Significantly different (P < 0.05)?	Yes		Significantly different (P < 0.05)?	No		Significantly different (P < 0.05)?	Yes		Significantly different (P < 0.05)?	No		Significantly different (P < 0.05)?	Yes		Significantly different (P < 0.05)?	No					Significantly different (P < 0.05)?	No		Significantly different (P < 0.05)?	No
						Data analyzed			Data analyzed			Data analyzed			Data analyzed			Data analyzed			Data analyzed						Data analyzed			Data analyzed
						Sample size, column A	5		Sample size, column A	5		Sample size, column A	5		Sample size, column A	5		Sample size, column A	5		Sample size, column A	5					Sample size, column A	5		Sample size, column A	5
						Sample size, column B	6		Sample size, column B	6		Sample size, column B	6		Sample size, column B	6		Sample size, column B	6		Sample size, column B	6					Sample size, column B	6		Sample size, column B	6

## Sheet: Figure 6 – figure supplement 1B
Undale	Wehrle
0	0			Wehrle
0	0		Best-fit values
0	0		Slope	0.8595
0	0		Y-intercept	-0.4563
0	0		X-intercept	0.5309
			1/slope	1.163
0	0
0	0		Std. Error
0	0		Slope	0.03867
0	0		Y-intercept	0.1246
0	0
1	0		95% Confidence Intervals
1	0		Slope	0.7821 to 0.9369
2	0		Y-intercept	-0.7057 to -0.2069
0	0		X-intercept	0.2599 to 0.7667
1	0
			Goodness of Fit
1	0		R squared	0.8949
1	0		Sy.x	0.5344
1	0
2	0		Is slope significantly non-zero?
1	0		F	494
4	3		DFn, DFd	1, 58
4	2		P value	<0.0001
4	2		Deviation from zero?	Significant
2	1
2	1		Equation	Y = 0.8595*X - 0.4563
2	1		Data
2	1		Number of X values	120
2	1		Maximum number of Y replicates	1
4	3		Total number of values	60
3	1		Number of missing values	60
5	4
4	3
4	3
3	2
3	1
3	2
2	1
2	2
4	4
4	3
5	4
5	4
5	4
4	3
4	3
3	2
3	2
3	2
5	4
5	4
5	4
5	4
5	4
5	4
4	4
4	4
3	2
4	4
5	4
5	4
