# Supplementary material for: Modulation of fracture healing by the transient accumulation of senescent cells
Source: eLife. 2021 Oct 7;10:e69958. doi: 10.7554/eLife.69958 (PMC8526061; doi:10.7554/eLife.69958)
Supplement: Figure 6—source data 1. — Raw scores for Figure 6, panel D. Raw callus area values for Figure 6, panel F. Raw values for Figure 6, panel G and H. [file elife-69958-fig6-data1.xlsx]

## Sheet: Fig. 6B
Cdkn2a
Veh		D+Q
0.638666		0.06675		Table Analyzed	Col: Entering replicate data		Gender:
1.01435		0.1847					Cdkn2a	Pdgfa	Foxo4	group	gender	gender_text		Cdkn2a:
1.35421		0.110326		Column B	D+Q		0.64	0.76	0.81	VEH	1	female		Source		Type III Sum of Squares	df	Mean Square	F	Sig.
1.21096		0.387884		vs.	vs.		1.01	1.97	0.62	VEH	2	male		group	Hypothesis	1.41995	1	1.41995	16.6468	0.00353389
0.781819		0.777577		Column A	Veh		1.35	0.93	0.75	VEH	2	male			Error	0.68239	8	.085b
		0.173073					1.21	0.69	1.76	VEH	1	female
				Unpaired t test			0.78	0.65	1.07	VEH	2	male		Pdgfa:
				P value	0.0022		0.07	0.62	0.53	DQ	1	female		group	Hypothesis	0.876947	1	0.876947	5.02431	0.055296
				P value summary	**		0.18	0.32	0.64	DQ	2	male			Error	1.39632	8	.175b
				Significantly different (P < 0.05)?	Yes		0.11	0.17	0.78	DQ	2	male
				One- or two-tailed P value?	Two-tailed		0.39	0.55	0.26	DQ	1	female		Foxo4:
				t, df	t=4.237, df=9		0.78	0.59	0.44	DQ	1	female		group	Hypothesis	0.758848	1	0.758848	6.09668	0.038762
							0.17	0.31	0.25	DQ	2	male			Error	0.995751	8	.124b
				How big is the difference?
				Mean of column A	1
				Mean of column B	0.2834
				Difference between means (B - A) ± SEM	-0.7166 ± 0.1691
				95% confidence interval	-1.099 to -0.3340
				R squared (eta squared)	0.666
				F test to compare variances
				F, DFn, Dfd	1.230, 4, 5
				P value	0.8078
				P value summary	ns
				Significantly different (P < 0.05)?	No
				Data analyzed
				Sample size, column A	5
				Sample size, column B	6
Pdgfa
Veh		D+Q
0.755179		0.621449
1.97188		0.323067		Table Analyzed	Col: Entering replicate data
0.930875		0.166865
0.694685		0.549979		Column B	D+Q
0.647382		0.590893		vs.	vs.
		0.312681		Column A	Veh
				Mann Whitney test
				P value	0.0043
				Exact or approximate P value?	Exact
				P value summary	**
				Significantly different (P < 0.05)?	Yes
				One- or two-tailed P value?	Two-tailed
				Sum of ranks in column A,B	45 , 21
				Mann-Whitney U	0
				Difference between medians
				Median of column A	0.7552, n=5
				Median of column B	0.4365, n=6
				Difference: Actual	-0.3187
				Difference: Hodges-Lehmann	-0.3815
Foxo4
Veh		D+Q
0.811856		0.528651
0.620999		0.642457		Table Analyzed	Col: Entering replicate data
0.745613		0.778299
1.75516		0.259679		Column B	D+Q
1.06638		0.439041		vs.	vs.
		0.24796		Column A	Veh
				Mann Whitney test
				P value	0.0303
				Exact or approximate P value?	Exact
				P value summary	*
				Significantly different (P < 0.05)?	Yes
				One- or two-tailed P value?	Two-tailed
				Sum of ranks in column A,B	42 , 24
				Mann-Whitney U	3
				Difference between medians
				Median of column A	0.8119, n=5
				Median of column B	0.4838, n=6
				Difference: Actual	-0.328
				Difference: Hodges-Lehmann	-0.3985

## Sheet: Fig. 6D
Healing score
Days post fracture	Veh																	D+Q
0	0	0	0	0	0	0	0	0	0	0	0	0	0	0	0	0	0	0	0	0	0	0	0	0	0	0	0	0	0	0	0	0	0	0
7	0	0	1	0	0	1	0	0	0	0	0	0	0	0	0	0	0	0	1	0	0	0	0	0	1	1	0	0	1	0	0	0	1	0
14	0	1	2	1	1	1	1	1	1	1	1	1	1	1	1	1	1	1	2	2	2	2	2	2	2	2	2	2	2	2	2	2	3	3
21	1	2	2	2	1	1	2	2	2	1	2	1	2	2	2	2	1	2	3	4	3	3	2	3	4	3	3	4	3	3	3	4	4	3
28	2	2	3	2	2	1	2	4	2	1	3	2	3	3	3	3	3	3	4	4	3	4	4	4	4	4	3	4	3	4	4	4	4	3
35	3	4	4	3	4	3	4	4	4	3	4	4	4	4	4	4	4	4	4	4	4	4	4	4	4	4	4	4	4	4	4	4	4	4
	Discovery?	P value	Mean of Veh	Mean of D+Q	Difference	SE of difference	t ratio	df	q value
0			0	0	0	0
7	No	0.269388	0.1176	0.2941	-0.1765	0.1542	1.144	16	0.108833
14	Yes	<0.000001	1	2.059	-1.059	0.104	10.18	16	<0.000001
21	Yes	<0.000001	1.647	3.176	-1.529	0.1248	12.26	16	<0.000001
28	Yes	3e-06	2.412	3.706	-1.294	0.1872	6.914	16	2e-06
35	No	0.04131	3.765	4	-0.2353	0.106	2.219	16	0.020862
AUC
31.5	56
49	84		Table Analyzed	Col: Entering replicate data
70	84
45.5	70		Column B	D+Q
42	77		vs.	vs.
38.5	70		Column A	Veh
49	77
63	91		Unpaired t test
49	84		P value	<0.0001
31.5	70		P value summary	****
56	84		Significantly different (P < 0.05)?	Yes
42	77		One- or two-tailed P value?	Two-tailed
56	77		t, df	t=8.610, df=32
56	77
56	84		How big is the difference?
56	98		Mean of column A	49.41
49	77		Mean of column B	78.65
			Difference between means (B - A) ± SEM	29.24 ± 3.395
			95% confidence interval	22.32 to 36.15
			R squared (eta squared)	0.6985
			F test to compare variances
			F, DFn, Dfd	1.202, 16, 16
			P value	0.7168
			P value summary	ns
			Significantly different (P < 0.05)?	No
			Data analyzed
			Sample size, column A	17
			Sample size, column B	17

## Sheet: Fig. 6F
Relative Callus Area
	Veh																	D+Q
0	1.72296	0.099866	0.876628	0.943682	0.428085	0.610804	0.538954	1.30222	0.293137	1.62588	1.82038	0.856579	1.29643	0.928518	1.32672	1.329	1.00016	1.30898	1.56372	1.32922	1.31188	1.49482	1.44445	1.90187	1.41802	1.25668	0.934369	0.799205	0.90445	0.925435	0.416145	0.73123	0.728106	0.505006
1	10.4289	14.4685	3.11459	2.68802	2.8011	5.6428	10.3987	12.5071	0.377249	25.6516	7.13738	8.69246	3.79473	7.63522	2.86979	10.9598	8.96731	3.11448	11.5395	6.60157	5.35923	5.26836	8.09455	8.70038	11.8131	5.58217	2.53315	29.1502	9.58251	22.332	7.287	86.8926	15.5671	6.33786
2	19.2651	5.73629	223.914	72.4534	31.2189	24.7328	23.9078	68.4711	13.2593	39.2774	34.4822	14.3637	25.4561	12.6369	24.7392	76.2887	55.2434	52.3545	86.4205	110.409	74.8553	117.045	98.1864	44.3699	81.5237	181.132	40.7227	71.5973	42.818	154.406	78.8168	231.889	39.0563	140.466
3	161.651	107.61	123.684	243.446	87.4029	93.5367	73.9697	173.87	43.0577	90.1491	95.923	56.8605	33.744	59.786	144.979	150.817	166.037	88.8617	198.264	330.212	109.55	168.803	183.965	91.7714	111.296	219.22	211.572	315.667	362.07	310.562	149.697	267.277	346.258	215.592
4	233.054	283.747	400.517	353.267	166.046	179.783	280.044	382.256	195.31	230.267	227.891	92.0782	59.6363	183.011	188.218	313.202	288.317	332.787	236.739	465.016	402.75	458.139	474.771	391.907	383.424	373.02	483.635	475.743	386.883	394.643	562.088	616.012	431.3	534.297
5	578.145	286.222	354.069	356.726	235.202	321.202	350.038	512.772	298.677	334.669	271.334	109.812	179.487	373.002	303.156	372.454	345.63	312.732	204.536	431.417	369.422	371.792	376.524	282.627	344.159	325.927	455.451	420.043	353.807	367.166	508.069	535.466	394.56	481.667
	Discovery?	P value	Mean of Veh	Mean of D+Q	Difference	SE of difference	t ratio	df	q value
0	No	0.465018	1	1.116	-0.1161	0.157	0.7395	32	0.313112
1	No	0.218458	8.126	14.46	-6.331	5.043	1.255	32	0.176514
2	Yes	0.007231	45.03	96.83	-51.8	18.05	2.869	32	0.009738
3	Yes	0.000336	112.1	216.5	-104.4	25.99	4.015	32	0.000678
4	Yes	<0.000001	238.6	435.5	-196.9	31.54	6.24	32	2e-06
5	No	0.100444	328.4	384.4	-56.05	33.13	1.692	32	0.101449
AUC
Veh	D+Q
714.3	634.1		Table Analyzed	Col: Entering replicate data
554.7	636
928.7	1129		Column B	D+Q
850.7	777.9		vs.	vs.
405.3	935.9		Column A	Veh
464.6	954
563.6	679		Unpaired t test
894.1	760.8		P value	<0.0001
401.5	942.5		P value summary	****
553.5	966.7		Significantly different (P < 0.05)?	Yes
502	1103		One- or two-tailed P value?	Two-tailed
227.3	978.7		t, df	t=5.325, df=32
213	1066
450	1052		How big is the difference?
513	1470		Mean of column A	568.6
738.2	1030		Mean of column B	956.1
691.9	1138		Difference between means (B - A) ± SEM	387.5 ± 72.77
			95% confidence interval	239.3 to 535.7
			R squared (eta squared)	0.4698
			F test to compare variances
			F, DFn, Dfd	1.026, 16, 16
			P value	0.9593
			P value summary	ns
			Significantly different (P < 0.05)?	No
			Data analyzed
			Sample size, column A	17
			Sample size, column B	17

## Sheet: Fig. 6G
Veh	D+Q
2.5755	3.257
3.1163	4.4482		Table Analyzed	Col: Entering replicate data
2.1072	3.0799
2.6774	1.4907		Column B	D+Q
2.7036	4.8477		vs.	vs.
1.0217	3.3451		Column A	Veh
1.9677	4.4083
2.2126	2.9347		Unpaired t test
1.1191	4.112		P value	0.0003
2.8642	5.3564		P value summary	***
2.2226	4.3485		Significantly different (P < 0.05)?	Yes
1.7442	2.5726		One- or two-tailed P value?	Two-tailed
3.727	2.4086		t, df	t=4.080, df=32
3.367	3.9916
1.8098	3.5484		How big is the difference?
2.5817	3.6099		Mean of column A	2.324
1.6819	2.5775		Mean of column B	3.549
			Difference between means (B - A) ± SEM	1.226 ± 0.3004
			95% confidence interval	0.6138 to 1.838
			R squared (eta squared)	0.3422
			F test to compare variances
			F, DFn, Dfd	1.811, 16, 16
			P value	0.2455
			P value summary	ns
			Significantly different (P < 0.05)?	No
			Data analyzed
			Sample size, column A	17
			Sample size, column B	17

## Sheet: Fig. 6H
Stiffness
Veh	D+Q
0.159	0.114		Table Analyzed	Col: Entering replicate data
0.196	0.143
0.193	0.126		Column B	D+Q
0.116	0.125		vs.	vs.
	0.166		Column A	Veh
0.027	0.132
0.097	0.173		Unpaired t test
0.007	0.238		P value	0.1162
0.011	0.116		P value summary	ns
0.105	0.086		Significantly different (P < 0.05)?	No
0.034	0.154		One- or two-tailed P value?	Two-tailed
0.041	0.106		t, df	t=1.619, df=29
0.166	0.011
0.136	0.2		How big is the difference?
0.18	0.19		Mean of column A	0.1049
	0.192		Mean of column B	0.1403
	0.113		Difference between means (B - A) ± SEM	0.03544 ± 0.02189
			95% confidence interval	-0.009326 to 0.08020
			R squared (eta squared)	0.08291
			F test to compare variances
			F, DFn, Dfd	1.783, 13, 16
			P value	0.2722
			P value summary	ns
			Significantly different (P < 0.05)?	No
			Data analyzed
			Sample size, column A	14
			Sample size, column B	17
Max torque
Veh	D+Q
2.121	2.913		Table Analyzed	Col: Entering replicate data
2.172	2.357
2.004	1.835		Column B	D+Q
1.33	1.78		vs.	vs.
	2.727		Column A	Veh
0.841	1.599
1.237	2.626		Unpaired t test
0.387	3.165		P value	0.0366
0.765	1.568		P value summary	*
0.948	1.69		Significantly different (P < 0.05)?	Yes
0.892	1.477		One- or two-tailed P value?	Two-tailed
1.935	1.111		t, df	t=2.191, df=29
1.99	0.743
1.316	2.288		How big is the difference?
2.353	2.033		Mean of column A	1.449
	2.258		Mean of column B	1.965
	1.239		Difference between means (B - A) ± SEM	0.5159 ± 0.2354
			95% confidence interval	0.03433 to 0.9974
			R squared (eta squared)	0.142
			F test to compare variances
			F, DFn, Dfd	1.104, 16, 13
			P value	0.8682
			P value summary	ns
			Significantly different (P < 0.05)?	No
			Data analyzed
			Sample size, column A	14
			Sample size, column B	17
